# Supplementary material for: Global investigation of composition and interaction networks in gut microbiomes of individuals belonging to diverse geographies and age-groups
Source: PubMed Central journal article supplement (PMC4858888; doi:10.1186/s13099-016-0099-z), 2016-05-06
Supplement: 13099_2016_99_MOESM4_ESM.pdf [file 13099_2016_99_MOESM4_ESM.pdf]

**Additional File 4: Centrality measures of different genera in the gut microbiomes of America, China, Denmark, France, India, Italy, Japan, Spain for co-occurrence and mutual exclusion networks**

America

Co-occurrence network

| Node_Index | Label                | Degree | Cluster_Coeff | Closeness | Betweenness | Eigen_Vector | PageRank | HubScore |
|------------|----------------------|--------|---------------|-----------|-------------|--------------|----------|----------|
| 1          | Abiotrophia          | 32     | 0.556         | 0.533     | 0.163       | 0.120        | 0.017    | 0.120    |
| 2          | Acholeplasma         | 38     | 0.686         | 0.593     | 0.218       | 0.162        | 0.019    | 0.162    |
| 3          | Alkaliphilus         | 44     | 0.631         | 0.640     | 0.205       | 0.183        | 0.021    | 0.183    |
| 4          | Anaerococcus         | 30     | 0.789         | 0.553     | 0.032       | 0.132        | 0.015    | 0.132    |
| 5          | Anaerofustis         | 37     | 0.592         | 0.579     | 0.165       | 0.148        | 0.019    | 0.148    |
| 6          | Anaerostipes         | 19     | 0.626         | 0.490     | 0.213       | 0.073        | 0.011    | 0.073    |
| 7          | Atopobium            | 42     | 0.632         | 0.608     | 0.140       | 0.176        | 0.021    | 0.176    |
| 8          | Bifidobacterium      | 28     | 0.685         | 0.545     | 0.055       | 0.117        | 0.014    | 0.117    |
| 9          | Bulleidia            | 8      | 0.786         | 0.429     | 0.002       | 0.031        | 0.006    | 0.031    |
| 10         | Butyrivibrio         | 10     | 0.622         | 0.451     | 0.231       | 0.032        | 0.009    | 0.032    |
| 11         | Caldicellulosiruptor | 33     | 0.782         | 0.566     | 0.038       | 0.149        | 0.016    | 0.149    |
| 12         | Catenibacterium      | 36     | 0.643         | 0.579     | 0.148       | 0.149        | 0.018    | 0.149    |
| 13         | Collinsella          | 37     | 0.692         | 0.584     | 0.091       | 0.158        | 0.018    | 0.158    |
| 14         | Coprobacillus        | 6      | 0.733         | 0.432     | 0.002       | 0.023        | 0.005    | 0.023    |
| 15         | Coproccoccus         | 31     | 0.630         | 0.557     | 0.107       | 0.126        | 0.016    | 0.126    |
| 16         | Dorea                | 21     | 0.614         | 0.493     | 0.050       | 0.075        | 0.012    | 0.075    |
| 17         | Eubacterium          | 4      | 1.000         | 0.415     | 0.000       | 0.014        | 0.004    | 0.014    |
| 18         | Fingoldia            | 22     | 0.857         | 0.514     | 0.016       | 0.094        | 0.012    | 0.094    |
| 19         | Gemella              | 36     | 0.706         | 0.589     | 0.086       | 0.155        | 0.018    | 0.155    |
| 20         | Mesoplasma           | 37     | 0.743         | 0.589     | 0.057       | 0.165        | 0.018    | 0.165    |
| 21         | Oribacterium         | 44     | 0.605         | 0.624     | 0.334       | 0.178        | 0.022    | 0.178    |
| 22         | Pelotomaculum        | 44     | 0.646         | 0.629     | 0.212       | 0.186        | 0.022    | 0.186    |
| 23         | Peptoniphilus        | 26     | 0.643         | 0.500     | 0.079       | 0.100        | 0.014    | 0.100    |
| 24         | Peptostreptococcus   | 29     | 0.754         | 0.541     | 0.063       | 0.133        | 0.015    | 0.133    |
| 25         | Ruminococcus         | 12     | 0.697         | 0.448     | 0.079       | 0.039        | 0.008    | 0.039    |
| 26         | Shuttleworthia       | 35     | 0.731         | 0.566     | 0.053       | 0.157        | 0.017    | 0.157    |
| 27         | Solobacterium        | 36     | 0.563         | 0.579     | 0.223       | 0.139        | 0.019    | 0.139    |
| 28         | Streptobacillus      | 23     | 0.798         | 0.507     | 0.025       | 0.100        | 0.012    | 0.100    |
| 29         | Subdoligranulum      | 20     | 0.684         | 0.510     | 0.041       | 0.080        | 0.011    | 0.080    |
| 30         | Thermanaerovibrio    | 41     | 0.685         | 0.624     | 0.146       | 0.178        | 0.020    | 0.178    |
| 31         | Thermoanaerobacter   | 42     | 0.641         | 0.613     | 0.186       | 0.175        | 0.021    | 0.175    |
| 32         | Treponema            | 43     | 0.657         | 0.624     | 0.145       | 0.183        | 0.021    | 0.183    |
| 33         | Turicibacter         | 35     | 0.709         | 0.584     | 0.101       | 0.150        | 0.017    | 0.150    |
| 34         | Acetivibrio          | 17     | 0.934         | 0.497     | 0.006       | 0.073        | 0.009    | 0.073    |
| 35         | Fusobacterium        | 19     | 0.836         | 0.510     | 0.026       | 0.079        | 0.010    | 0.079    |
| 36         | Oxalobacter          | 21     | 0.743         | 0.533     | 0.941       | 0.089        | 0.013    | 0.089    |
| 37         | Aerococcus           | 24     | 0.725         | 0.514     | 0.023       | 0.107        | 0.012    | 0.107    |
| 38         | Akkermansia          | 3      | 1.000         | 0.401     | 0.000       | 0.015        | 0.003    | 0.015    |
| 39         | Alicyclobacillus     | 33     | 0.822         | 0.557     | 0.018       | 0.156        | 0.016    | 0.156    |
| 40         | Fibrobacter          | 33     | 0.748         | 0.593     | 0.436       | 0.149        | 0.017    | 0.149    |
| 41         | Mitsuokella          | 35     | 0.790         | 0.566     | 0.024       | 0.162        | 0.017    | 0.162    |
| 42         | Moorella             | 37     | 0.728         | 0.584     | 0.057       | 0.164        | 0.018    | 0.164    |
| 43         | Parascardovia        | 39     | 0.699         | 0.629     | 0.648       | 0.170        | 0.020    | 0.170    |
| 44         | Pseudoramibacter     | 39     | 0.677         | 0.593     | 0.108       | 0.166        | 0.019    | 0.166    |
| 45         | Pyramidobacter       | 39     | 0.717         | 0.603     | 0.094       | 0.172        | 0.019    | 0.172    |
| 46         | Selenomonas          | 40     | 0.728         | 0.608     | 0.076       | 0.179        | 0.019    | 0.179    |
| 47         | Slackia              | 41     | 0.694         | 0.613     | 0.112       | 0.179        | 0.020    | 0.179    |
| 48         | Symbiobacterium      | 35     | 0.714         | 0.566     | 0.081       | 0.152        | 0.017    | 0.152    |
| 49         | Acidaminococcus      | 1      | 0.000         | 0.260     | 0.000       | 0.000        | 0.003    | 0.000    |
| 50         | Blautia              | 5      | 0.300         | 0.349     | 0.237       | 0.005        | 0.008    | 0.005    |

America

|    |                      |    |       |       |       |          |       |          |
|----|----------------------|----|-------|-------|-------|----------|-------|----------|
| 51 | Bilophila            | 25 | 0.763 | 0.521 | 0.036 | 0.110    | 0.013 | 0.110    |
| 52 | Dehalococcoides      | 13 | 0.705 | 0.462 | 0.007 | 0.057    | 0.008 | 0.057    |
| 53 | Desulfitobacterium   | 35 | 0.630 | 0.575 | 0.199 | 0.142    | 0.018 | 0.142    |
| 54 | Eggerthella          | 30 | 0.724 | 0.541 | 0.108 | 0.125    | 0.016 | 0.125    |
| 55 | Heliobacterium       | 31 | 0.746 | 0.549 | 0.092 | 0.134    | 0.016 | 0.134    |
| 56 | Holdemania           | 28 | 0.743 | 0.545 | 0.205 | 0.119    | 0.015 | 0.119    |
| 57 | Jonquetella          | 23 | 0.874 | 0.518 | 0.013 | 0.106    | 0.012 | 0.106    |
| 58 | Alistipes            | 2  | 0.000 | 0.317 | 0.167 | 0.000    | 0.006 | 0.000    |
| 59 | Bacteroides          | 4  | 0.500 | 0.251 | 0.011 | 1.99E-05 | 0.010 | 1.99E-05 |
| 60 | Dyadobacter          | 7  | 0.286 | 0.448 | 1.000 | 0.013    | 0.011 | 0.013    |
| 61 | Clostridium          | 16 | 0.583 | 0.480 | 0.163 | 0.057    | 0.010 | 0.057    |
| 62 | Succinatimonas       | 8  | 0.786 | 0.440 | 0.002 | 0.035    | 0.006 | 0.035    |
| 63 | Anaerotruncus        | 3  | 0.333 | 0.369 | 0.017 | 0.006    | 0.004 | 0.006    |
| 64 | Pseudoflavonifractor | 16 | 0.825 | 0.456 | 0.049 | 0.064    | 0.010 | 0.064    |
| 65 | Capnocytophaga       | 6  | 0.600 | 0.253 | 0.011 | 3.85E-05 | 0.014 | 3.85E-05 |
| 66 | Parabacteroides      | 6  | 0.733 | 0.284 | 0.032 | 0.000    | 0.013 | 0.000    |
| 67 | Paraprevotella       | 6  | 0.733 | 0.284 | 0.032 | 0.000    | 0.013 | 0.000    |
| 68 | Faecalibacterium     | 6  | 0.867 | 0.412 | 0.000 | 0.024    | 0.005 | 0.024    |
| 69 | Roseburia            | 1  | 0.000 | 0.312 | 0.000 | 0.001    | 0.003 | 0.001    |
| 70 | Dysgonomonas         | 7  | 0.571 | 0.326 | 0.140 | 0.000    | 0.014 | 0.000    |
| 71 | Prevotella           | 5  | 0.900 | 0.282 | 0.010 | 0.000    | 0.011 | 0.000    |
| 72 | Sphingobacterium     | 3  | 0.667 | 0.320 | 0.084 | 0.000    | 0.007 | 0.000    |
| 73 | Mobiluncus           | 3  | 1.000 | 0.384 | 0.000 | 0.012    | 0.003 | 0.012    |
| 74 | Porphyromonas        | 6  | 0.533 | 0.376 | 0.665 | 0.003    | 0.011 | 0.003    |

Mutual exclusion network

| Node_Index | Label            | Degree | Cluster_Coeff | Closeness | Betweenness | Eigen_Vector | PageRank | HubScore |
|------------|------------------|--------|---------------|-----------|-------------|--------------|----------|----------|
| 1          | Abiotrophia      | 1      | 0.000         | 0.233     | 0.000       | 0.096        | 0.007    | 0.096    |
| 2          | Bacteroides      | 46     | 0.000         | 0.299     | 1.000       | 0.672        | 0.260    | 0.672    |
| 3          | Acholeplasma     | 2      | 0.000         | 0.242     | 0.014       | 0.112        | 0.011    | 0.112    |
| 4          | Blautia          | 9      | 0.000         | 0.220     | 0.099       | 0.119        | 0.043    | 0.119    |
| 5          | Acidaminococcus  | 1      | 0.000         | 0.156     | 0.000       | 0.002        | 0.008    | 0.002    |
| 6          | Dyadobacter      | 2      | 0.000         | 0.183     | 0.036       | 0.017        | 0.013    | 0.017    |
| 7          | Alicyclobacillus | 1      | 0.000         | 0.233     | 0.000       | 0.096        | 0.007    | 0.096    |
| 8          | Alistipes        | 2      | 0.000         | 0.201     | 0.000       | 0.042        | 0.010    | 0.042    |
| 9          | Anaerostipes     | 5      | 0.000         | 0.244     | 0.041       | 0.146        | 0.023    | 0.146    |
| 10         | Ruminococcus     | 6      | 0.000         | 0.246     | 0.077       | 0.149        | 0.028    | 0.149    |
| 11         | Alkaliphilus     | 1      | 0.000         | 0.233     | 0.000       | 0.096        | 0.007    | 0.096    |
| 12         | Anaerococcus     | 2      | 0.000         | 0.242     | 0.014       | 0.112        | 0.011    | 0.112    |
| 13         | Anaerofustis     | 4      | 0.000         | 0.242     | 0.024       | 0.140        | 0.019    | 0.140    |
| 14         | Dysgonomonas     | 6      | 0.000         | 0.215     | 0.045       | 0.101        | 0.028    | 0.101    |
| 15         | Parabacteroides  | 5      | 0.000         | 0.204     | 0.004       | 0.097        | 0.023    | 0.097    |
| 16         | Paraprevotella   | 6      | 0.000         | 0.217     | 0.018       | 0.116        | 0.026    | 0.116    |
| 17         | Anaerotruncus    | 2      | 0.000         | 0.203     | 0.001       | 0.022        | 0.011    | 0.022    |
| 18         | Fingoldia        | 3      | 0.000         | 0.244     | 0.044       | 0.116        | 0.016    | 0.116    |
| 19         | Prevotella       | 4      | 0.000         | 0.211     | 0.026       | 0.039        | 0.020    | 0.039    |
| 20         | Atopobium        | 1      | 0.000         | 0.233     | 0.000       | 0.096        | 0.007    | 0.096    |
| 21         | Bifidobacterium  | 1      | 0.000         | 0.233     | 0.000       | 0.096        | 0.007    | 0.096    |
| 22         | Bilophila        | 1      | 0.000         | 0.233     | 0.000       | 0.096        | 0.007    | 0.096    |
| 23         | Butyrivibrio     | 1      | 0.000         | 0.233     | 0.000       | 0.096        | 0.007    | 0.096    |
| 24         | Catenibacterium  | 1      | 0.000         | 0.233     | 0.000       | 0.096        | 0.007    | 0.096    |

America

|    |                       |   |       |       |       |          |       |       |
|----|-----------------------|---|-------|-------|-------|----------|-------|-------|
| 25 | Clostridium           | 4 | 0.000 | 0.242 | 0.024 | 0.140    | 0.019 | 0.140 |
| 26 | Collinsella           | 1 | 0.000 | 0.233 | 0.000 | 0.096    | 0.007 | 0.096 |
| 27 | Coprococcus           | 2 | 0.000 | 0.234 | 0.006 | 0.109    | 0.011 | 0.109 |
| 28 | Desulfotobacterium    | 2 | 0.000 | 0.236 | 0.039 | 0.098    | 0.012 | 0.098 |
| 29 | Dorea                 | 1 | 0.000 | 0.233 | 0.000 | 0.096    | 0.007 | 0.096 |
| 30 | Eggerthella           | 1 | 0.000 | 0.233 | 0.000 | 0.096    | 0.007 | 0.096 |
| 31 | Fibrobacter           | 1 | 0.000 | 0.233 | 0.000 | 0.096    | 0.007 | 0.096 |
| 32 | Gemella               | 1 | 0.000 | 0.233 | 0.000 | 0.096    | 0.007 | 0.096 |
| 33 | Heliobacterium        | 1 | 0.000 | 0.233 | 0.000 | 0.096    | 0.007 | 0.096 |
| 34 | Holdemania            | 1 | 0.000 | 0.233 | 0.000 | 0.096    | 0.007 | 0.096 |
| 35 | Jonquetella           | 1 | 0.000 | 0.233 | 0.000 | 0.096    | 0.007 | 0.096 |
| 36 | Mesoplasma            | 2 | 0.000 | 0.236 | 0.035 | 0.100    | 0.013 | 0.100 |
| 37 | Mitsuokella           | 1 | 0.000 | 0.233 | 0.000 | 0.096    | 0.007 | 0.096 |
| 38 | Moorella              | 1 | 0.000 | 0.233 | 0.000 | 0.096    | 0.007 | 0.096 |
| 39 | Oribacterium          | 1 | 0.000 | 0.233 | 0.000 | 0.096    | 0.007 | 0.096 |
| 40 | Parascardovia         | 1 | 0.000 | 0.233 | 0.000 | 0.096    | 0.007 | 0.096 |
| 41 | Pelotomaculum         | 1 | 0.000 | 0.233 | 0.000 | 0.096    | 0.007 | 0.096 |
| 42 | Peptoniphilus         | 2 | 0.000 | 0.242 | 0.014 | 0.112    | 0.011 | 0.112 |
| 43 | Pseudoramibacter      | 1 | 0.000 | 0.233 | 0.000 | 0.096    | 0.007 | 0.096 |
| 44 | Pyramidobacter        | 1 | 0.000 | 0.233 | 0.000 | 0.096    | 0.007 | 0.096 |
| 45 | Selenomonas           | 1 | 0.000 | 0.233 | 0.000 | 0.096    | 0.007 | 0.096 |
| 46 | Shuttleworthia        | 1 | 0.000 | 0.233 | 0.000 | 0.096    | 0.007 | 0.096 |
| 47 | Slackia               | 2 | 0.000 | 0.236 | 0.035 | 0.100    | 0.013 | 0.100 |
| 48 | Solobacterium         | 1 | 0.000 | 0.233 | 0.000 | 0.096    | 0.007 | 0.096 |
| 49 | Streptobacillus       | 2 | 0.000 | 0.242 | 0.014 | 0.112    | 0.011 | 0.112 |
| 50 | Subdoligranulum       | 4 | 0.000 | 0.243 | 0.081 | 0.120    | 0.020 | 0.120 |
| 51 | Succinatimonas        | 1 | 0.000 | 0.233 | 0.000 | 0.096    | 0.007 | 0.096 |
| 52 | Symbiobacterium       | 1 | 0.000 | 0.233 | 0.000 | 0.096    | 0.007 | 0.096 |
| 53 | Thermanaerovibrio     | 1 | 0.000 | 0.233 | 0.000 | 0.096    | 0.007 | 0.096 |
| 54 | Thermoanaerobacter    | 1 | 0.000 | 0.233 | 0.000 | 0.096    | 0.007 | 0.096 |
| 55 | Treponema             | 1 | 0.000 | 0.233 | 0.000 | 0.096    | 0.007 | 0.096 |
| 56 | Turicibacter          | 1 | 0.000 | 0.233 | 0.000 | 0.096    | 0.007 | 0.096 |
| 57 | Capnocytophaga        | 2 | 0.000 | 0.200 | 0.009 | 0.019    | 0.011 | 0.019 |
| 58 | Pseudoflavonifractor  | 3 | 0.000 | 0.179 | 0.006 | 0.010    | 0.017 | 0.010 |
| 59 | Coprobacillus         | 1 | 0.000 | 0.179 | 0.000 | 0.014    | 0.006 | 0.014 |
| 60 | Sutterella            | 2 | 0.000 | 0.199 | 0.009 | 0.015    | 0.012 | 0.015 |
| 61 | Dialister             | 1 | 0.000 | 0.016 | 0.000 | 1.84E-18 | 0.015 | 0.000 |
| 62 | Phascolarctobacterium | 1 | 0.000 | 0.016 | 0.000 | 0.000    | 0.015 | 0.000 |
| 63 | Megasphaera           | 3 | 0.000 | 0.195 | 0.036 | 0.029    | 0.020 | 0.029 |
| 64 | Oxalobacter           | 1 | 0.000 | 0.165 | 0.000 | 0.004    | 0.008 | 0.004 |
| 65 | Sphingobacterium      | 1 | 0.000 | 0.199 | 0.000 | 0.021    | 0.006 | 0.021 |

## China

## Co-occurrence network

| Node_Index | Label                | Degree | Cluster_Coeff | Closeness | Betweenness | Eigen_Vector | PageRank | HubScore |
|------------|----------------------|--------|---------------|-----------|-------------|--------------|----------|----------|
| 1          | Abiotrophia          | 14     | 0.626         | 0.482     | 0.042       | 0.114        | 0.019    | 0.114    |
| 2          | Anaerofustis         | 18     | 0.569         | 0.505     | 0.067       | 0.176        | 0.022    | 0.176    |
| 3          | Anaerostipes         | 15     | 0.619         | 0.486     | 0.037       | 0.124        | 0.019    | 0.124    |
| 4          | Butyrivibrio         | 12     | 0.621         | 0.453     | 0.025       | 0.098        | 0.016    | 0.098    |
| 5          | Catenibacterium      | 18     | 0.601         | 0.505     | 0.061       | 0.169        | 0.023    | 0.169    |
| 6          | Clostridium          | 9      | 0.833         | 0.421     | 0.003       | 0.070        | 0.013    | 0.070    |
| 7          | Coprococcus          | 25     | 0.480         | 0.541     | 0.238       | 0.210        | 0.031    | 0.210    |
| 8          | Dorea                | 17     | 0.588         | 0.495     | 0.056       | 0.132        | 0.022    | 0.132    |
| 9          | Eubacterium          | 10     | 0.667         | 0.482     | 0.109       | 0.080        | 0.015    | 0.080    |
| 10         | Oribacterium         | 20     | 0.532         | 0.525     | 0.141       | 0.190        | 0.025    | 0.190    |
| 11         | Peptoniphilus        | 21     | 0.452         | 0.530     | 0.299       | 0.159        | 0.027    | 0.159    |
| 12         | Peptostreptococcus   | 12     | 0.652         | 0.473     | 0.017       | 0.118        | 0.016    | 0.118    |
| 13         | Roseburia            | 5      | 0.900         | 0.390     | 0.001       | 0.032        | 0.009    | 0.032    |
| 14         | Shuttleworthia       | 29     | 0.463         | 0.589     | 0.265       | 0.261        | 0.035    | 0.261    |
| 15         | Subdoligranulum      | 23     | 0.545         | 0.582     | 0.236       | 0.219        | 0.029    | 0.219    |
| 16         | Acidaminococcus      | 3      | 0.333         | 0.333     | 0.355       | 0.004        | 0.015    | 0.004    |
| 17         | Dialister            | 8      | 0.500         | 0.477     | 0.534       | 0.067        | 0.015    | 0.067    |
| 18         | Escherichia          | 2      | 1.000         | 0.252     | 0.000       | 0.000        | 0.012    | 0.000    |
| 19         | Shigella             | 2      | 1.000         | 0.252     | 0.000       | 0.000        | 0.012    | 0.000    |
| 20         | Alistipes            | 18     | 0.366         | 0.541     | 1.000       | 0.125        | 0.032    | 0.125    |
| 21         | Anaerotruncus        | 13     | 0.885         | 0.525     | 0.017       | 0.149        | 0.017    | 0.149    |
| 22         | Bilophila            | 5      | 0.400         | 0.398     | 0.150       | 0.018        | 0.015    | 0.018    |
| 23         | Capnocytophaga       | 3      | 1.000         | 0.363     | 0.000       | 0.009        | 0.009    | 0.009    |
| 24         | Collinsella          | 24     | 0.569         | 0.589     | 0.195       | 0.236        | 0.030    | 0.236    |
| 25         | Dysgonomonas         | 4      | 0.500         | 0.411     | 0.018       | 0.021        | 0.010    | 0.021    |
| 26         | Heliobacterium       | 17     | 0.691         | 0.546     | 0.252       | 0.168        | 0.024    | 0.168    |
| 27         | Holdemania           | 17     | 0.706         | 0.546     | 0.075       | 0.178        | 0.022    | 0.178    |
| 28         | Parabacteroides      | 4      | 0.333         | 0.366     | 0.224       | 0.008        | 0.016    | 0.008    |
| 29         | Paraprevotella       | 5      | 0.600         | 0.368     | 0.037       | 0.010        | 0.014    | 0.010    |
| 30         | Porphyromonas        | 4      | 0.667         | 0.366     | 0.005       | 0.010        | 0.011    | 0.010    |
| 31         | Prevotella           | 7      | 0.381         | 0.424     | 0.190       | 0.026        | 0.017    | 0.026    |
| 32         | Pseudoflavonifractor | 23     | 0.573         | 0.582     | 0.247       | 0.226        | 0.029    | 0.226    |
| 33         | Pseudoramibacter     | 26     | 0.529         | 0.624     | 0.298       | 0.248        | 0.032    | 0.248    |
| 34         | Pyramidobacter       | 24     | 0.572         | 0.609     | 0.223       | 0.234        | 0.030    | 0.234    |
| 35         | Selenomonas          | 20     | 0.605         | 0.582     | 0.297       | 0.192        | 0.027    | 0.192    |
| 36         | Slackia              | 20     | 0.679         | 0.558     | 0.099       | 0.205        | 0.025    | 0.205    |
| 37         | Anaerococcus         | 10     | 0.800         | 0.453     | 0.006       | 0.087        | 0.014    | 0.087    |
| 38         | Atopobium            | 18     | 0.588         | 0.515     | 0.073       | 0.171        | 0.023    | 0.171    |
| 39         | Bulleidia            | 12     | 0.712         | 0.465     | 0.019       | 0.121        | 0.016    | 0.121    |
| 40         | Finegoldia           | 10     | 0.644         | 0.431     | 0.012       | 0.084        | 0.014    | 0.084    |
| 41         | Solobacterium        | 24     | 0.504         | 0.546     | 0.158       | 0.217        | 0.029    | 0.217    |
| 42         | Streptobacillus      | 10     | 0.778         | 0.457     | 0.007       | 0.092        | 0.014    | 0.092    |
| 43         | Turicibacter         | 9      | 0.861         | 0.424     | 0.003       | 0.077        | 0.013    | 0.077    |
| 44         | Eggerthella          | 16     | 0.742         | 0.510     | 0.022       | 0.172        | 0.020    | 0.172    |
| 45         | Blautia              | 8      | 0.893         | 0.414     | 0.001       | 0.061        | 0.012    | 0.061    |
| 46         | Coprobacillus        | 14     | 0.615         | 0.486     | 0.045       | 0.133        | 0.018    | 0.133    |
| 47         | Ruminococcus         | 9      | 0.889         | 0.417     | 0.002       | 0.070        | 0.013    | 0.070    |
| 48         | Symbiobacterium      | 17     | 0.728         | 0.505     | 0.039       | 0.179        | 0.021    | 0.179    |
| 49         | Bacteroides          | 2      | 1.000         | 0.290     | 0.000       | 0.001        | 0.009    | 0.001    |
| 50         | Faecalibacterium     | 8      | 0.679         | 0.424     | 0.012       | 0.066        | 0.012    | 0.066    |
| 51         | Megasphaera          | 7      | 0.857         | 0.442     | 0.006       | 0.072        | 0.011    | 0.072    |

## China

|    |                       |    |       |       |       |       |       |       |
|----|-----------------------|----|-------|-------|-------|-------|-------|-------|
| 52 | Mitsuokella           | 12 | 0.697 | 0.505 | 0.084 | 0.116 | 0.018 | 0.116 |
| 53 | Sutterella            | 1  | 0.000 | 0.269 | 0.000 | 0.000 | 0.006 | 0.000 |
| 54 | Phascolarctobacterium | 2  | 1.000 | 0.301 | 0.000 | 0.002 | 0.007 | 0.002 |

## Mutual exclusion network

| Node_Index | Label                 | Degree | Cluster_Coeff | Closeness | Betweenness | Eigen_Vector | PageRank | HubScore |
|------------|-----------------------|--------|---------------|-----------|-------------|--------------|----------|----------|
| 1          | Abiotrophia           | 6      | 0.000         | 0.454     | 0.151       | 0.244        | 0.037    | 0.304    |
| 2          | Bacteroides           | 23     | 0.000         | 0.611     | 1.000       | 0.534        | 0.166    | 0.000    |
| 3          | Bilophila             | 2      | 0.000         | 0.324     | 0.001       | 0.090        | 0.014    | 0.000    |
| 4          | Escherichia           | 9      | 0.000         | 0.379     | 0.144       | 0.261        | 0.051    | 0.000    |
| 5          | Parabacteroides       | 7      | 0.000         | 0.373     | 0.064       | 0.236        | 0.043    | 0.000    |
| 6          | Shigella              | 7      | 0.000         | 0.367     | 0.080       | 0.209        | 0.039    | 0.000    |
| 7          | Sutterella            | 1      | 0.000         | 0.314     | 0.000       | 0.043        | 0.009    | 0.000    |
| 8          | Acidaminococcus       | 5      | 0.000         | 0.349     | 0.034       | 0.151        | 0.029    | 0.000    |
| 9          | Butyrivibrio          | 5      | 0.000         | 0.444     | 0.097       | 0.247        | 0.029    | 0.308    |
| 10         | Coprococcus           | 6      | 0.000         | 0.454     | 0.127       | 0.263        | 0.035    | 0.328    |
| 11         | Eubacterium           | 3      | 0.000         | 0.284     | 0.002       | 0.110        | 0.018    | 0.137    |
| 12         | Faecalibacterium      | 4      | 0.000         | 0.295     | 0.037       | 0.119        | 0.025    | 0.149    |
| 13         | Roseburia             | 3      | 0.000         | 0.284     | 0.002       | 0.110        | 0.018    | 0.137    |
| 14         | Alistipes             | 2      | 0.000         | 0.319     | 0.003       | 0.053        | 0.016    | 0.000    |
| 15         | Clostridium           | 4      | 0.000         | 0.404     | 0.063       | 0.156        | 0.028    | 0.194    |
| 16         | Ruminococcus          | 8      | 0.000         | 0.444     | 0.302       | 0.145        | 0.063    | 0.180    |
| 17         | Anaerococcus          | 1      | 0.000         | 0.383     | 0.000       | 0.095        | 0.009    | 0.118    |
| 18         | Anaerofustis          | 1      | 0.000         | 0.383     | 0.000       | 0.095        | 0.009    | 0.118    |
| 19         | Anaerostipes          | 2      | 0.000         | 0.389     | 0.024       | 0.103        | 0.017    | 0.128    |
| 20         | Paraprevotella        | 2      | 0.000         | 0.314     | 0.005       | 0.044        | 0.017    | 0.000    |
| 21         | Anaerotruncus         | 2      | 0.000         | 0.280     | 0.000       | 0.083        | 0.013    | 0.104    |
| 22         | Atopobium             | 1      | 0.000         | 0.246     | 0.000       | 0.009        | 0.010    | 0.012    |
| 23         | Phascolarctobacterium | 3      | 0.000         | 0.324     | 0.066       | 0.053        | 0.025    | 0.000    |
| 24         | Blautia               | 2      | 0.000         | 0.389     | 0.004       | 0.137        | 0.015    | 0.170    |
| 25         | Catenibacterium       | 1      | 0.000         | 0.383     | 0.000       | 0.095        | 0.009    | 0.118    |
| 26         | Collinsella           | 1      | 0.000         | 0.383     | 0.000       | 0.095        | 0.009    | 0.118    |
| 27         | Dialister             | 1      | 0.000         | 0.383     | 0.000       | 0.095        | 0.009    | 0.118    |
| 28         | Dorea                 | 2      | 0.000         | 0.389     | 0.004       | 0.137        | 0.015    | 0.170    |
| 29         | Mitsuokella           | 1      | 0.000         | 0.383     | 0.000       | 0.095        | 0.009    | 0.118    |
| 30         | Oribacterium          | 1      | 0.000         | 0.383     | 0.000       | 0.095        | 0.009    | 0.118    |
| 31         | Peptoniphilus         | 3      | 0.000         | 0.404     | 0.061       | 0.146        | 0.022    | 0.182    |
| 32         | Peptostreptococcus    | 1      | 0.000         | 0.383     | 0.000       | 0.095        | 0.009    | 0.118    |
| 33         | Pseudoramibacter      | 1      | 0.000         | 0.383     | 0.000       | 0.095        | 0.009    | 0.118    |
| 34         | Pyramidobacter        | 1      | 0.000         | 0.383     | 0.000       | 0.095        | 0.009    | 0.118    |
| 35         | Selenomonas           | 1      | 0.000         | 0.383     | 0.000       | 0.095        | 0.009    | 0.118    |
| 36         | Shuttleworthia        | 2      | 0.000         | 0.419     | 0.021       | 0.141        | 0.014    | 0.176    |
| 37         | Solobacterium         | 1      | 0.000         | 0.383     | 0.000       | 0.095        | 0.009    | 0.118    |
| 38         | Subdoligranulum       | 3      | 0.000         | 0.444     | 0.160       | 0.150        | 0.021    | 0.187    |
| 39         | Capnocytophaga        | 1      | 0.000         | 0.310     | 0.000       | 0.026        | 0.010    | 0.000    |
| 40         | Prevotella            | 2      | 0.000         | 0.319     | 0.003       | 0.053        | 0.016    | 0.000    |
| 41         | Dysgonomonas          | 1      | 0.000         | 0.310     | 0.000       | 0.026        | 0.010    | 0.000    |
| 42         | Fusobacterium         | 4      | 0.000         | 0.333     | 0.125       | 0.051        | 0.032    | 0.000    |
| 43         | Holdemania            | 1      | 0.000         | 0.251     | 0.000       | 0.009        | 0.010    | 0.011    |
| 44         | Pseudoflavonifractor  | 1      | 0.000         | 0.251     | 0.000       | 0.009        | 0.010    | 0.011    |
| 45         | Porphyromonas         | 1      | 0.000         | 0.310     | 0.000       | 0.026        | 0.010    | 0.000    |

## Denmark

## Co-occurrence network

| Node_Index | Label                | Degree | Cluster_Coeff | Closeness | Betweenness | Eigen_Vector | PageRank | HubScore |
|------------|----------------------|--------|---------------|-----------|-------------|--------------|----------|----------|
| 1          | Abiotrophia          | 1      | 0.000         | 0.125     | 0.000       | 0.009        | 0.003    | 0.009    |
| 2          | Anaerococcus         | 22     | 0.784         | 0.141     | 0.190       | 0.184        | 0.020    | 0.184    |
| 3          | Acetivibrio          | 22     | 0.823         | 0.142     | 0.020       | 0.191        | 0.018    | 0.191    |
| 4          | Acholeplasma         | 27     | 0.638         | 0.143     | 0.179       | 0.212        | 0.023    | 0.212    |
| 5          | Alicyclobacillus     | 24     | 0.500         | 0.145     | 0.280       | 0.153        | 0.021    | 0.153    |
| 6          | Alkaliphilus         | 30     | 0.579         | 0.145     | 0.197       | 0.227        | 0.025    | 0.227    |
| 7          | Anaerofustis         | 21     | 0.795         | 0.142     | 0.075       | 0.181        | 0.018    | 0.181    |
| 8          | Brachyspira          | 19     | 0.801         | 0.139     | 0.028       | 0.161        | 0.016    | 0.161    |
| 9          | Caldicellulosiruptor | 24     | 0.754         | 0.142     | 0.035       | 0.203        | 0.020    | 0.203    |
| 10         | Erysipelothrix       | 25     | 0.730         | 0.143     | 0.049       | 0.212        | 0.021    | 0.212    |
| 11         | Finegoldia           | 23     | 0.719         | 0.145     | 0.194       | 0.192        | 0.019    | 0.192    |
| 12         | Fusobacterium        | 26     | 0.643         | 0.143     | 0.116       | 0.202        | 0.022    | 0.202    |
| 13         | Gemella              | 18     | 0.948         | 0.141     | 0.005       | 0.167        | 0.015    | 0.167    |
| 14         | Granulicatella       | 26     | 0.708         | 0.143     | 0.056       | 0.216        | 0.021    | 0.216    |
| 15         | Leptotrichia         | 17     | 0.926         | 0.137     | 0.006       | 0.153        | 0.015    | 0.153    |
| 16         | Mesoplasma           | 27     | 0.613         | 0.144     | 0.990       | 0.208        | 0.025    | 0.208    |
| 17         | Mycoplasma           | 32     | 0.567         | 0.148     | 0.249       | 0.241        | 0.026    | 0.241    |
| 18         | Peptoniphilus        | 21     | 0.705         | 0.142     | 0.234       | 0.173        | 0.019    | 0.173    |
| 19         | Selenomonas          | 31     | 0.467         | 0.147     | 0.535       | 0.198        | 0.027    | 0.198    |
| 20         | Solobacterium        | 16     | 0.900         | 0.140     | 0.005       | 0.149        | 0.014    | 0.149    |
| 21         | Streptobacillus      | 21     | 0.752         | 0.140     | 0.065       | 0.171        | 0.019    | 0.171    |
| 22         | Syntrophomonas       | 12     | 0.652         | 0.138     | 0.046       | 0.094        | 0.011    | 0.094    |
| 23         | Thermoanaerobacter   | 22     | 0.814         | 0.141     | 0.027       | 0.189        | 0.018    | 0.189    |
| 24         | Turicibacter         | 27     | 0.661         | 0.144     | 0.139       | 0.218        | 0.023    | 0.218    |
| 25         | Aerococcus           | 13     | 0.654         | 0.136     | 0.023       | 0.102        | 0.012    | 0.102    |
| 26         | Bulleidia            | 3      | 1.000         | 0.129     | 0.000       | 0.028        | 0.004    | 0.028    |
| 27         | Heliobacterium       | 24     | 0.496         | 0.143     | 0.343       | 0.137        | 0.023    | 0.137    |
| 28         | Jonquetella          | 25     | 0.540         | 0.146     | 0.315       | 0.182        | 0.022    | 0.182    |
| 29         | Peptostreptococcus   | 3      | 1.000         | 0.128     | 0.000       | 0.028        | 0.004    | 0.028    |
| 30         | Treponema            | 12     | 0.545         | 0.138     | 0.057       | 0.088        | 0.012    | 0.088    |
| 31         | Acidaminococcus      | 7      | 1.000         | 0.134     | 0.000       | 0.033        | 0.008    | 0.033    |
| 32         | Eggerthella          | 16     | 0.692         | 0.140     | 0.153       | 0.068        | 0.017    | 0.068    |
| 33         | Mitsuokella          | 10     | 0.933         | 0.136     | 0.002       | 0.050        | 0.011    | 0.050    |
| 34         | Pseudoramibacter     | 19     | 0.614         | 0.141     | 0.118       | 0.096        | 0.018    | 0.096    |
| 35         | Pyramidobacter       | 20     | 0.547         | 0.143     | 0.357       | 0.088        | 0.020    | 0.088    |
| 36         | Slackia              | 18     | 0.641         | 0.141     | 0.225       | 0.078        | 0.019    | 0.078    |
| 37         | Magnetospirillum     | 7      | 0.667         | 0.133     | 0.004       | 0.045        | 0.008    | 0.045    |
| 38         | Rhodospirillum       | 5      | 0.800         | 0.131     | 0.001       | 0.030        | 0.006    | 0.030    |
| 39         | Akkermansia          | 15     | 0.562         | 0.140     | 0.146       | 0.106        | 0.014    | 0.106    |
| 40         | Bifidobacterium      | 3      | 0.333         | 0.128     | 0.002       | 0.009        | 0.005    | 0.009    |
| 41         | Thermanaerovibrio    | 22     | 0.524         | 0.142     | 0.143       | 0.124        | 0.020    | 0.124    |
| 42         | Desulfovibrio        | 11     | 0.564         | 0.138     | 0.065       | 0.066        | 0.011    | 0.066    |
| 43         | Parascardovia        | 17     | 0.669         | 0.142     | 0.340       | 0.087        | 0.017    | 0.087    |
| 44         | Pseudoflavonifractor | 15     | 0.686         | 0.140     | 0.225       | 0.068        | 0.016    | 0.068    |
| 45         | Shuttleworthia       | 14     | 0.714         | 0.139     | 0.049       | 0.069        | 0.014    | 0.069    |
| 46         | Symbiobacterium      | 20     | 0.611         | 0.143     | 0.168       | 0.133        | 0.018    | 0.133    |
| 47         | Alistipes            | 3      | 0.000         | 0.119     | 0.688       | 0.001        | 0.014    | 0.001    |
| 48         | Anaerotruncus        | 7      | 0.476         | 0.131     | 1.000       | 0.018        | 0.014    | 0.018    |
| 49         | Bilophila            | 2      | 0.000         | 0.108     | 0.351       | 3.99E-05     | 0.012    | 3.99E-05 |
| 50         | Dysgonomonas         | 1      | 0.000         | 0.107     | 0.000       | 3.98E-05     | 0.006    | 3.98E-05 |

## Denmark

|    |                    |   |       |       |       |          |       |          |
|----|--------------------|---|-------|-------|-------|----------|-------|----------|
| 51 | Fibrobacter        | 3 | 0.667 | 0.129 | 0.000 | 0.022    | 0.005 | 0.022    |
| 52 | Dialister          | 1 | 0.000 | 0.117 | 0.000 | 0.001    | 0.004 | 0.001    |
| 53 | Atopobium          | 1 | 0.000 | 0.125 | 0.000 | 0.008    | 0.003 | 0.008    |
| 54 | Collinsella        | 6 | 0.733 | 0.128 | 0.007 | 0.019    | 0.008 | 0.019    |
| 55 | Parabacteroides    | 2 | 0.000 | 0.099 | 0.178 | 1.86E-06 | 0.014 | 1.86E-06 |
| 56 | Blautia            | 1 | 0.000 | 0.014 | 0.000 | 0.000    | 0.014 | 0.000    |
| 57 | Roseburia          | 1 | 0.000 | 0.014 | 0.000 | 5.08E-19 | 0.014 | 0.000    |
| 58 | Butyrivibrio       | 2 | 0.000 | 0.129 | 0.680 | 0.010    | 0.007 | 0.010    |
| 59 | Prevotella         | 4 | 0.167 | 0.117 | 0.524 | 0.000    | 0.020 | 0.000    |
| 60 | Capnocytophaga     | 2 | 1.000 | 0.106 | 0.000 | 2.23E-05 | 0.011 | 2.23E-05 |
| 61 | Paraprevotella     | 2 | 1.000 | 0.106 | 0.000 | 2.23E-05 | 0.011 | 2.23E-05 |
| 62 | Coprobacillus      | 1 | 0.000 | 0.015 | 0.000 | 0.000    | 0.011 | 0.000    |
| 63 | Eubacterium        | 2 | 0.000 | 0.015 | 0.003 | 0.000    | 0.021 | 0.000    |
| 64 | Coprococcus        | 1 | 0.000 | 0.122 | 0.000 | 0.002    | 0.003 | 0.002    |
| 65 | Desulfitobacterium | 9 | 0.639 | 0.137 | 0.181 | 0.046    | 0.011 | 0.046    |
| 66 | Dehalococcoides    | 1 | 0.000 | 0.127 | 0.000 | 0.006    | 0.003 | 0.006    |
| 67 | Dorea              | 1 | 0.000 | 0.015 | 0.000 | 0.000    | 0.011 | 0.000    |
| 68 | Faecalibacterium   | 1 | 0.000 | 0.090 | 0.000 | 8.70E-08 | 0.008 | 8.70E-08 |
| 69 | Holdemanina        | 4 | 1.000 | 0.133 | 0.000 | 0.022    | 0.005 | 0.022    |
| 70 | Porphyromonas      | 1 | 0.000 | 0.106 | 0.000 | 2.13E-05 | 0.006 | 2.13E-05 |

## Mutual exclusion network

| Node_Index | Label              | Degree | Cluster_Coeff | Closeness | Betweenness | Eigen_Vector | PageRank | HubScore |
|------------|--------------------|--------|---------------|-----------|-------------|--------------|----------|----------|
| 1          | Acetivibrio        | 1      | 0.000         | 0.093     | 0.000       | 0.079        | 0.009    | 0.039    |
| 2          | Bacteroides        | 15     | 0.000         | 0.100     | 1.000       | 0.404        | 0.105    | 0.536    |
| 3          | Acholeplasma       | 3      | 0.000         | 0.100     | 0.144       | 0.237        | 0.021    | 0.116    |
| 4          | Faecalibacterium   | 11     | 0.000         | 0.096     | 0.347       | 0.326        | 0.074    | 0.432    |
| 5          | Roseburia          | 18     | 0.000         | 0.099     | 0.883       | 0.475        | 0.130    | 0.631    |
| 6          | Akkermansia        | 2      | 0.000         | 0.094     | 0.026       | 0.157        | 0.015    | 0.077    |
| 7          | Alicyclobacillus   | 1      | 0.000         | 0.092     | 0.000       | 0.093        | 0.009    | 0.046    |
| 8          | Alistipes          | 2      | 0.000         | 0.089     | 0.086       | 0.019        | 0.021    | 0.026    |
| 9          | Anaerostipes       | 1      | 0.000         | 0.083     | 0.000       | 0.004        | 0.012    | 0.002    |
| 10         | Prevotella         | 5      | 0.000         | 0.095     | 0.549       | 0.094        | 0.044    | 0.046    |
| 11         | Anaerococcus       | 2      | 0.000         | 0.095     | 0.028       | 0.143        | 0.015    | 0.070    |
| 12         | Anaerofustis       | 1      | 0.000         | 0.093     | 0.000       | 0.079        | 0.009    | 0.039    |
| 13         | Anaerotruncus      | 1      | 0.000         | 0.021     | 0.000       | 0.000        | 0.020    | 0.000    |
| 14         | Coprobacillus      | 1      | 0.000         | 0.021     | 0.000       | 0.000        | 0.020    | 0.000    |
| 15         | Atopobium          | 1      | 0.000         | 0.021     | 0.000       | 0.000        | 0.020    | 0.000    |
| 16         | Sutterella         | 1      | 0.000         | 0.021     | 0.000       | 0.000        | 0.020    | 0.000    |
| 17         | Butyrivibrio       | 1      | 0.000         | 0.093     | 0.000       | 0.079        | 0.009    | 0.039    |
| 18         | Fingoldia          | 2      | 0.000         | 0.095     | 0.028       | 0.143        | 0.015    | 0.070    |
| 19         | Fusobacterium      | 2      | 0.000         | 0.095     | 0.028       | 0.143        | 0.015    | 0.070    |
| 20         | Gemella            | 2      | 0.000         | 0.095     | 0.028       | 0.143        | 0.015    | 0.070    |
| 21         | Heliobacterium     | 2      | 0.000         | 0.099     | 0.090       | 0.173        | 0.015    | 0.085    |
| 22         | Mesoplasma         | 3      | 0.000         | 0.100     | 0.144       | 0.237        | 0.021    | 0.116    |
| 23         | Oribacterium       | 1      | 0.000         | 0.093     | 0.000       | 0.079        | 0.009    | 0.039    |
| 24         | Pseudoramibacter   | 2      | 0.000         | 0.099     | 0.090       | 0.173        | 0.015    | 0.085    |
| 25         | Selenomonas        | 2      | 0.000         | 0.099     | 0.090       | 0.173        | 0.015    | 0.085    |
| 26         | Thermoanaerobacter | 1      | 0.000         | 0.093     | 0.000       | 0.079        | 0.009    | 0.039    |
| 27         | Bifidobacterium    | 1      | 0.000         | 0.089     | 0.000       | 0.019        | 0.011    | 0.025    |
| 28         | Blautia            | 2      | 0.000         | 0.088     | 0.003       | 0.053        | 0.016    | 0.071    |



## Denmark

|    |                       |   |       |       |       |          |       |       |
|----|-----------------------|---|-------|-------|-------|----------|-------|-------|
| 29 | Symbiobacterium       | 2 | 0.000 | 0.092 | 0.027 | 0.104    | 0.016 | 0.051 |
| 30 | Turicibacter          | 3 | 0.000 | 0.095 | 0.085 | 0.168    | 0.022 | 0.082 |
| 31 | Desulfitobacterium    | 1 | 0.000 | 0.021 | 0.000 | 0.000    | 0.020 | 0.000 |
| 32 | Parabacteroides       | 1 | 0.000 | 0.021 | 0.000 | 0.000    | 0.020 | 0.000 |
| 33 | Dialister             | 1 | 0.000 | 0.078 | 0.000 | 0.001    | 0.012 | 0.001 |
| 34 | Phascolarctobacterium | 2 | 0.000 | 0.083 | 0.086 | 0.004    | 0.022 | 0.002 |
| 35 | Dysgonomonas          | 2 | 0.000 | 0.089 | 0.168 | 0.019    | 0.020 | 0.026 |
| 36 | Eggerthella           | 1 | 0.000 | 0.092 | 0.000 | 0.093    | 0.009 | 0.046 |
| 37 | Erysipelothrix        | 2 | 0.000 | 0.094 | 0.026 | 0.157    | 0.015 | 0.077 |
| 38 | Peptoniphilus         | 1 | 0.000 | 0.089 | 0.000 | 0.064    | 0.009 | 0.031 |
| 39 | Streptobacillus       | 1 | 0.000 | 0.089 | 0.000 | 0.064    | 0.009 | 0.031 |
| 40 | Jonquetella           | 1 | 0.000 | 0.092 | 0.000 | 0.093    | 0.009 | 0.046 |
| 41 | Mitsuokella           | 1 | 0.000 | 0.021 | 0.000 | 3.46E-19 | 0.020 | 0.000 |
| 42 | Ruminococcus          | 1 | 0.000 | 0.021 | 0.000 | 1.49E-17 | 0.020 | 0.000 |
| 43 | Mycoplasma            | 1 | 0.000 | 0.092 | 0.000 | 0.093    | 0.009 | 0.046 |
| 44 | Parascardovia         | 1 | 0.000 | 0.092 | 0.000 | 0.093    | 0.009 | 0.046 |
| 45 | Subdoligranulum       | 1 | 0.000 | 0.089 | 0.000 | 0.019    | 0.011 | 0.025 |
| 46 | Pseudoflavonifractor  | 1 | 0.000 | 0.092 | 0.000 | 0.093    | 0.009 | 0.046 |
| 47 | Pyramidobacter        | 1 | 0.000 | 0.092 | 0.000 | 0.093    | 0.009 | 0.046 |
| 48 | Slackia               | 1 | 0.000 | 0.092 | 0.000 | 0.093    | 0.009 | 0.046 |
| 49 | Thermanaerovibrio     | 1 | 0.000 | 0.092 | 0.000 | 0.093    | 0.009 | 0.046 |

## Co-occurrence network

| Node_Index | Label                | Degree | Cluster_Coeff | Closeness | Betweenness | Eigen_Vector | PageRank | HubScore |
|------------|----------------------|--------|---------------|-----------|-------------|--------------|----------|----------|
| 1          | Acholeplasma         | 2      | 0.000         | 0.014     | 0.011       | 9.34E-18     | 0.016    | 5.39E-17 |
| 2          | Desulfococcus        | 1      | 0.000         | 0.014     | 0.000       | 2.69E-18     | 0.009    | 1.42E-17 |
| 3          | Mesoplasma           | 2      | 0.000         | 0.014     | 0.017       | 1.57E-17     | 0.015    | 5.39E-17 |
| 4          | Akkermansia          | 1      | 0.000         | 0.013     | 0.000       | 0.000        | 0.013    | 2.06E-17 |
| 5          | Bacteroides          | 1      | 0.000         | 0.013     | 0.000       | 0.000        | 0.013    | 2.06E-17 |
| 6          | Alicyclobacillus     | 2      | 0.000         | 0.025     | 0.102       | 0.021        | 0.011    | 0.021    |
| 7          | Symbiobacterium      | 1      | 0.000         | 0.024     | 0.000       | 0.003        | 0.006    | 0.003    |
| 8          | Thioalkalivibrio     | 3      | 0.333         | 0.025     | 0.199       | 0.123        | 0.011    | 0.123    |
| 9          | Alkalilimnicola      | 1      | 0.000         | 0.024     | 0.000       | 0.000        | 0.008    | 0.000    |
| 10         | Thermoanaerobacter   | 2      | 0.000         | 0.024     | 0.102       | 0.001        | 0.013    | 0.001    |
| 11         | Ammonifex            | 3      | 0.667         | 0.025     | 0.008       | 0.012        | 0.011    | 0.012    |
| 12         | Desmospora           | 4      | 0.333         | 0.025     | 0.049       | 0.026        | 0.014    | 0.026    |
| 13         | Sphaerobacter        | 3      | 0.667         | 0.025     | 0.008       | 0.012        | 0.011    | 0.012    |
| 14         | Thermanaerovibrio    | 5      | 0.200         | 0.025     | 0.251       | 0.034        | 0.019    | 0.034    |
| 15         | Anaerococcus         | 1      | 0.000         | 0.013     | 0.000       | 0.000        | 0.013    | 2.06E-17 |
| 16         | Peptoniphilus        | 1      | 0.000         | 0.013     | 0.000       | 2.38E-18     | 0.013    | 2.06E-17 |
| 17         | Anaerostipes         | 2      | 1.000         | 0.014     | 0.000       | 9.71E-18     | 0.013    | 1.57E-17 |
| 18         | Blautia              | 2      | 1.000         | 0.014     | 0.000       | 2.79E-18     | 0.013    | 1.57E-17 |
| 19         | Ruminococcus         | 2      | 1.000         | 0.014     | 0.000       | 3.22E-18     | 0.013    | 1.57E-17 |
| 20         | Anaerotruncus        | 1      | 0.000         | 0.013     | 0.000       | 0.000        | 0.013    | 2.06E-17 |
| 21         | Desulfitobacterium   | 1      | 0.000         | 0.013     | 0.000       | 2.73E-18     | 0.013    | 2.06E-17 |
| 22         | Atopobium            | 2      | 0.000         | 0.014     | 0.003       | 0.000        | 0.019    | 1.57E-17 |
| 23         | Eggerthella          | 1      | 0.000         | 0.014     | 0.000       | 1.65E-18     | 0.010    | 7.83E-18 |
| 24         | Subdoligranulum      | 1      | 0.000         | 0.014     | 0.000       | 4.53E-18     | 0.010    | 7.83E-18 |
| 25         | Bifidobacterium      | 10     | 0.378         | 0.025     | 1.000       | 0.412        | 0.026    | 0.412    |
| 26         | Desulfatibacillum    | 7      | 0.714         | 0.025     | 0.043       | 0.362        | 0.018    | 0.362    |
| 27         | Desulfomicrobium     | 5      | 1.000         | 0.025     | 0.000       | 0.289        | 0.013    | 0.289    |
| 28         | Dyadobacter          | 8      | 0.429         | 0.025     | 0.222       | 0.325        | 0.021    | 0.325    |
| 29         | Opitutus             | 7      | 0.714         | 0.025     | 0.043       | 0.362        | 0.018    | 0.362    |
| 30         | Pelotomaculum        | 7      | 0.381         | 0.025     | 0.674       | 0.152        | 0.022    | 0.152    |
| 31         | Phenylobacterium     | 7      | 0.524         | 0.025     | 0.289       | 0.306        | 0.019    | 0.306    |
| 32         | Pseudoramibacter     | 6      | 0.467         | 0.025     | 0.537       | 0.146        | 0.019    | 0.146    |
| 33         | Roseomonas           | 6      | 0.867         | 0.025     | 0.008       | 0.334        | 0.015    | 0.334    |
| 34         | Selenomonas          | 5      | 0.600         | 0.025     | 0.126       | 0.139        | 0.015    | 0.139    |
| 35         | Brachybacterium      | 8      | 0.321         | 0.025     | 0.262       | 0.103        | 0.025    | 0.103    |
| 36         | Jonquetella          | 3      | 0.667         | 0.025     | 0.013       | 0.043        | 0.010    | 0.043    |
| 37         | Methanocorpusculum   | 3      | 0.667         | 0.025     | 0.003       | 0.032        | 0.010    | 0.032    |
| 38         | Pseudoflavonifractor | 4      | 0.667         | 0.025     | 0.035       | 0.070        | 0.013    | 0.070    |
| 39         | Pyramidobacter       | 2      | 1.000         | 0.025     | 0.000       | 0.024        | 0.008    | 0.024    |
| 40         | Brachyspira          | 3      | 0.333         | 0.014     | 0.011       | 1.04E-17     | 0.019    | 6.18E-17 |
| 41         | Cardiobacterium      | 2      | 1.000         | 0.014     | 0.000       | 1.71E-17     | 0.013    | 1.57E-17 |
| 42         | Catenibacterium      | 3      | 0.333         | 0.014     | 0.017       | 1.92E-17     | 0.019    | 4.90E-17 |
| 43         | Dorea                | 1      | 0.000         | 0.014     | 0.000       | 1.18E-17     | 0.007    | 1.42E-17 |
| 44         | Bulleidia            | 1      | 0.000         | 0.014     | 0.000       | 3.95E-18     | 0.008    | 1.42E-17 |
| 45         | Eubacterium          | 2      | 0.000         | 0.014     | 0.011       | 1.48E-17     | 0.014    | 4.12E-17 |
| 46         | Capnocytophaga       | 1      | 0.000         | 0.025     | 0.000       | 0.004        | 0.006    | 0.004    |
| 47         | Heliobacterium       | 3      | 0.000         | 0.025     | 0.383       | 0.025        | 0.015    | 0.025    |
| 48         | Chlorobaculum        | 3      | 0.667         | 0.025     | 0.050       | 0.063        | 0.011    | 0.063    |
| 49         | Finegoldia           | 2      | 1.000         | 0.024     | 0.000       | 0.021        | 0.008    | 0.021    |
| 50         | Rhodothermus         | 3      | 0.667         | 0.025     | 0.050       | 0.063        | 0.011    | 0.063    |

France

|    |                       |   |       |       |       |          |       |          |
|----|-----------------------|---|-------|-------|-------|----------|-------|----------|
| 51 | Chromobacterium       | 1 | 0.000 | 0.013 | 0.000 | 3.00E-19 | 0.013 | 2.06E-17 |
| 52 | Methanobrevibacter    | 1 | 0.000 | 0.013 | 0.000 | 0.000    | 0.013 | 2.06E-17 |
| 53 | Fibrobacter           | 5 | 0.600 | 0.025 | 0.015 | 0.204    | 0.014 | 0.204    |
| 54 | Desulfotomaculum      | 2 | 0.000 | 0.025 | 0.199 | 0.005    | 0.011 | 0.005    |
| 55 | Oceanobacillus        | 3 | 0.333 | 0.025 | 0.289 | 0.031    | 0.013 | 0.031    |
| 56 | Desulfovibrio         | 1 | 0.000 | 0.013 | 0.000 | 0.000    | 0.013 | 2.06E-17 |
| 57 | Phascolarctobacterium | 1 | 0.000 | 0.013 | 0.000 | 3.83E-19 | 0.013 | 2.06E-17 |
| 58 | Magnetospirillum      | 3 | 1.000 | 0.025 | 0.000 | 0.103    | 0.009 | 0.103    |
| 59 | Paenibacillus         | 3 | 1.000 | 0.025 | 0.000 | 0.103    | 0.009 | 0.103    |
| 60 | Erysipelothrix        | 1 | 0.000 | 0.013 | 0.000 | 0.000    | 0.013 | 2.06E-17 |
| 61 | Turicibacter          | 1 | 0.000 | 0.013 | 0.000 | 0.000    | 0.013 | 2.06E-17 |
| 62 | Escherichia           | 1 | 0.000 | 0.013 | 0.000 | 4.63E-19 | 0.013 | 2.06E-17 |
| 63 | Treponema             | 1 | 0.000 | 0.013 | 0.000 | 2.82E-18 | 0.013 | 2.06E-17 |
| 64 | Faecalibacterium      | 1 | 0.000 | 0.013 | 0.000 | 0.000    | 0.013 | 2.06E-17 |
| 65 | Leptotrichia          | 1 | 0.000 | 0.013 | 0.000 | 1.09E-18 | 0.013 | 2.06E-17 |
| 66 | Gemella               | 1 | 0.000 | 0.014 | 0.000 | 8.35E-18 | 0.008 | 7.83E-18 |
| 67 | Oxalobacter           | 3 | 0.000 | 0.014 | 0.020 | 1.57E-18 | 0.023 | 2.35E-17 |
| 68 | Mitsuokella           | 2 | 0.000 | 0.025 | 0.199 | 0.004    | 0.012 | 0.004    |
| 69 | Macrococcus           | 1 | 0.000 | 0.014 | 0.000 | 6.83E-18 | 0.008 | 7.83E-18 |
| 70 | Prevotella            | 2 | 0.000 | 0.024 | 0.102 | 0.001    | 0.014 | 0.001    |
| 71 | Moorella              | 1 | 0.000 | 0.025 | 0.000 | 0.006    | 0.005 | 0.006    |
| 72 | Parabacteroides       | 1 | 0.000 | 0.013 | 0.000 | 0.000    | 0.013 | 2.06E-17 |
| 73 | Roseburia             | 1 | 0.000 | 0.013 | 0.000 | 2.75E-18 | 0.013 | 2.06E-17 |
| 74 | Slackia               | 1 | 0.000 | 0.024 | 0.000 | 0.000    | 0.008 | 0.000    |
| 75 | Rubrobacter           | 1 | 0.000 | 0.013 | 0.000 | 0.000    | 0.013 | 2.06E-17 |
| 76 | Scardovia             | 1 | 0.000 | 0.013 | 0.000 | 0.000    | 0.013 | 2.06E-17 |

Mutual exclusion network

| Node_Index | Label                | Degree | Cluster_Coeff | Closeness | Betweenness | Eigen_Vector | PageRank | HubScore |
|------------|----------------------|--------|---------------|-----------|-------------|--------------|----------|----------|
| 1          | Abiotrophia          | 3      | 0.000         | 0.019     | 0.025       | 0.000        | 0.034    | 0.000    |
| 2          | Anaerotruncus        | 1      | 0.000         | 0.019     | 0.000       | 0.000        | 0.012    | 0.000    |
| 3          | Desulfitobacterium   | 1      | 0.000         | 0.019     | 0.000       | 0.000        | 0.012    | 0.000    |
| 4          | Slackia              | 1      | 0.000         | 0.019     | 0.000       | 0.000        | 0.012    | 0.000    |
| 5          | Actinomyces          | 1      | 0.000         | 0.018     | 0.000       | 4.03E-18     | 0.018    | 0.000    |
| 6          | Desulfovibrio        | 1      | 0.000         | 0.018     | 0.000       | 5.57E-18     | 0.018    | 0.000    |
| 7          | Alistipes            | 1      | 0.000         | 0.018     | 0.000       | 3.11E-18     | 0.018    | 0.000    |
| 8          | Peptoniphilus        | 1      | 0.000         | 0.018     | 0.000       | 0.000        | 0.018    | 0.000    |
| 9          | Anaerofustis         | 2      | 0.000         | 0.019     | 0.017       | 0.000        | 0.023    | 0.000    |
| 10         | Rothia               | 2      | 0.000         | 0.019     | 0.017       | 0.000        | 0.023    | 0.000    |
| 11         | Veillonella          | 1      | 0.000         | 0.019     | 0.000       | 0.000        | 0.012    | 0.000    |
| 12         | Atopobium            | 1      | 0.000         | 0.019     | 0.000       | 0.000        | 0.012    | 0.000    |
| 13         | Turicibacter         | 2      | 0.000         | 0.019     | 0.017       | 3.12E-18     | 0.023    | 0.000    |
| 14         | Bifidobacterium      | 2      | 0.000         | 0.027     | 0.092       | 0.277        | 0.014    | 0.344    |
| 15         | Parabacteroides      | 9      | 0.000         | 0.027     | 1.000       | 0.570        | 0.061    | 0.000    |
| 16         | Roseburia            | 6      | 0.000         | 0.027     | 0.732       | 0.395        | 0.039    | 0.000    |
| 17         | Bilophila            | 1      | 0.000         | 0.018     | 0.000       | 5.86E-18     | 0.018    | 0.000    |
| 18         | Granulicatella       | 1      | 0.000         | 0.018     | 0.000       | 3.11E-18     | 0.018    | 0.000    |
| 19         | Brachyspira          | 1      | 0.000         | 0.027     | 0.000       | 0.011        | 0.010    | 0.000    |
| 20         | Fibrobacter          | 3      | 0.000         | 0.027     | 0.322       | 0.037        | 0.026    | 0.046    |
| 21         | Caldicellulosiruptor | 1      | 0.000         | 0.018     | 0.000       | 0.000        | 0.014    | 6.62E-18 |
| 22         | Mobiluncus           | 2      | 0.000         | 0.018     | 0.008       | 7.85E-18     | 0.026    | 1.32E-17 |

## France

|    |                    |   |       |       |       |          |       |          |
|----|--------------------|---|-------|-------|-------|----------|-------|----------|
| 23 | Capnocytophaga     | 1 | 0.000 | 0.018 | 0.000 | 1.33E-18 | 0.018 | 0.000    |
| 24 | Coprobacillus      | 1 | 0.000 | 0.018 | 0.000 | 8.33E-18 | 0.018 | 0.000    |
| 25 | Cardiobacterium    | 1 | 0.000 | 0.027 | 0.000 | 0.011    | 0.010 | 0.000    |
| 26 | Chromobacterium    | 1 | 0.000 | 0.018 | 0.000 | 0.000    | 0.014 | 6.62E-18 |
| 27 | Clostridium        | 2 | 0.000 | 0.018 | 0.008 | 0.000    | 0.026 | 1.32E-17 |
| 28 | Finegoldia         | 1 | 0.000 | 0.018 | 0.000 | 2.93E-18 | 0.014 | 6.62E-18 |
| 29 | Coprococcus        | 1 | 0.000 | 0.019 | 0.000 | 0.000    | 0.012 | 0.000    |
| 30 | Holdemania         | 3 | 0.000 | 0.019 | 0.025 | 0.000    | 0.034 | 0.000    |
| 31 | Cryptobacterium    | 1 | 0.000 | 0.018 | 0.000 | 5.58E-19 | 0.014 | 6.62E-18 |
| 32 | Sutterella         | 2 | 0.000 | 0.018 | 0.008 | 3.22E-18 | 0.026 | 1.32E-17 |
| 33 | Desulfatibacillum  | 2 | 0.000 | 0.027 | 0.240 | 0.144    | 0.015 | 0.179    |
| 34 | Dorea              | 3 | 0.000 | 0.027 | 0.474 | 0.108    | 0.022 | 0.000    |
| 35 | Desulfomicrobium   | 2 | 0.000 | 0.027 | 0.092 | 0.277    | 0.014 | 0.344    |
| 36 | Dialister          | 1 | 0.000 | 0.019 | 0.000 | 0.000    | 0.012 | 0.000    |
| 37 | Opitutus           | 2 | 0.000 | 0.027 | 0.309 | 0.194    | 0.015 | 0.242    |
| 38 | Eggerthella        | 2 | 0.000 | 0.019 | 0.017 | 0.000    | 0.023 | 0.000    |
| 39 | Erysipelothrix     | 1 | 0.000 | 0.019 | 0.000 | 0.000    | 0.012 | 0.000    |
| 40 | Enterococcus       | 1 | 0.000 | 0.027 | 0.000 | 0.056    | 0.010 | 0.000    |
| 41 | Phenylobacterium   | 3 | 0.000 | 0.027 | 0.322 | 0.196    | 0.025 | 0.243    |
| 42 | Heliobacterium     | 1 | 0.000 | 0.027 | 0.000 | 0.163    | 0.008 | 0.203    |
| 43 | Solobacterium      | 1 | 0.000 | 0.019 | 0.000 | 0.000    | 0.012 | 0.000    |
| 44 | Jonquetella        | 1 | 0.000 | 0.027 | 0.000 | 0.163    | 0.008 | 0.203    |
| 45 | Lactococcus        | 1 | 0.000 | 0.027 | 0.000 | 0.056    | 0.010 | 0.000    |
| 46 | Porphyromonas      | 1 | 0.000 | 0.018 | 0.000 | 0.000    | 0.014 | 6.62E-18 |
| 47 | Oceanobacillus     | 1 | 0.000 | 0.027 | 0.000 | 0.012    | 0.010 | 0.015    |
| 48 | Streptococcus      | 3 | 0.000 | 0.027 | 0.322 | 0.043    | 0.027 | 0.000    |
| 49 | Pseudoramibacter   | 2 | 0.000 | 0.027 | 0.092 | 0.277    | 0.014 | 0.344    |
| 50 | Roseomonas         | 1 | 0.000 | 0.027 | 0.000 | 0.163    | 0.008 | 0.203    |
| 51 | Selenomonas        | 2 | 0.000 | 0.027 | 0.092 | 0.277    | 0.014 | 0.344    |
| 52 | Pelotomaculum      | 2 | 0.000 | 0.027 | 0.446 | 0.126    | 0.016 | 0.156    |
| 53 | Peptostreptococcus | 1 | 0.000 | 0.018 | 0.000 | 5.95E-18 | 0.018 | 0.000    |
| 54 | Shuttleworthia     | 1 | 0.000 | 0.018 | 0.000 | 5.98E-18 | 0.018 | 0.000    |
| 55 | Succinatimonas     | 1 | 0.000 | 0.019 | 0.000 | 0.000    | 0.012 | 0.000    |
| 56 | Ruminococcus       | 1 | 0.000 | 0.018 | 0.000 | 0.000    | 0.014 | 6.62E-18 |
| 57 | Thermanaerovibrio  | 1 | 0.000 | 0.027 | 0.000 | 0.012    | 0.010 | 0.015    |

## India

## Co-occurrence network

| Node_Index | Label                | Degree | Cluster_Coeff | Closeness | Betweenness | Eigen_Vector | PageRank | HubScore |
|------------|----------------------|--------|---------------|-----------|-------------|--------------|----------|----------|
| 1          | Abiotrophia          | 5      | 0.500         | 0.117     | 0.005       | 0.074        | 0.010    | 0.074    |
| 2          | Anaerostipes         | 5      | 0.700         | 0.123     | 0.012       | 0.093        | 0.010    | 0.093    |
| 3          | Anaerotruncus        | 9      | 0.667         | 0.127     | 0.044       | 0.171        | 0.015    | 0.171    |
| 4          | Butyrivibrio         | 13     | 0.590         | 0.125     | 0.040       | 0.220        | 0.021    | 0.220    |
| 5          | Eubacterium          | 9      | 0.583         | 0.120     | 0.023       | 0.132        | 0.016    | 0.132    |
| 6          | Oribacterium         | 10     | 0.667         | 0.127     | 0.048       | 0.199        | 0.017    | 0.199    |
| 7          | Acetivibrio          | 4      | 1.000         | 0.118     | 0.000       | 0.004        | 0.011    | 0.004    |
| 8          | Anaerofustis         | 7      | 0.619         | 0.120     | 0.033       | 0.006        | 0.018    | 0.006    |
| 9          | Brachyspira          | 9      | 0.528         | 0.129     | 0.822       | 0.025        | 0.021    | 0.025    |
| 10         | Finegoldia           | 9      | 0.556         | 0.120     | 0.086       | 0.007        | 0.022    | 0.007    |
| 11         | Streptobacillus      | 8      | 0.679         | 0.119     | 0.012       | 0.006        | 0.019    | 0.006    |
| 12         | Aliivibrio           | 8      | 0.607         | 0.119     | 0.083       | 0.005        | 0.020    | 0.005    |
| 13         | Bulleidia            | 3      | 1.000         | 0.108     | 0.000       | 0.001        | 0.009    | 0.001    |
| 14         | Photobacterium       | 8      | 0.536         | 0.119     | 0.128       | 0.005        | 0.021    | 0.005    |
| 15         | Succinatimonas       | 3      | 1.000         | 0.108     | 0.000       | 0.001        | 0.009    | 0.001    |
| 16         | Tolumonas            | 8      | 0.536         | 0.119     | 0.128       | 0.005        | 0.021    | 0.005    |
| 17         | Alistipes            | 6      | 0.800         | 0.129     | 0.093       | 0.097        | 0.012    | 0.097    |
| 18         | Dysgonomonas         | 13     | 0.538         | 0.137     | 0.511       | 0.190        | 0.023    | 0.190    |
| 19         | Fibrobacter          | 13     | 0.590         | 0.136     | 0.425       | 0.203        | 0.023    | 0.203    |
| 20         | Heliobacterium       | 11     | 0.655         | 0.131     | 0.126       | 0.169        | 0.021    | 0.169    |
| 21         | Oxalobacter          | 4      | 0.500         | 0.126     | 0.740       | 0.045        | 0.011    | 0.045    |
| 22         | Slackia              | 14     | 0.516         | 0.138     | 1.000       | 0.224        | 0.024    | 0.224    |
| 23         | Solobacterium        | 14     | 0.473         | 0.135     | 0.311       | 0.237        | 0.024    | 0.237    |
| 24         | Bifidobacterium      | 4      | 0.167         | 0.124     | 0.472       | 0.010        | 0.013    | 0.010    |
| 25         | Peptostreptococcus   | 5      | 0.600         | 0.122     | 0.047       | 0.012        | 0.012    | 0.012    |
| 26         | Faecalibacterium     | 10     | 0.733         | 0.125     | 0.009       | 0.199        | 0.017    | 0.199    |
| 27         | Pseudoflavonifractor | 18     | 0.392         | 0.135     | 0.425       | 0.304        | 0.029    | 0.304    |
| 28         | Subdoligranulum      | 15     | 0.495         | 0.134     | 0.305       | 0.284        | 0.024    | 0.284    |
| 29         | Holdemania           | 15     | 0.514         | 0.132     | 0.266       | 0.274        | 0.024    | 0.274    |
| 30         | Atopobium            | 1      | 0.000         | 0.094     | 0.000       | 8.01E-06     | 0.007    | 8.01E-06 |
| 31         | Coprobacillus        | 3      | 0.333         | 0.102     | 0.118       | 8.84E-05     | 0.018    | 8.84E-05 |
| 32         | Bacteroides          | 1      | 0.000         | 0.016     | 0.000       | 2.03E-18     | 0.016    | 0.000    |
| 33         | Parabacteroides      | 1      | 0.000         | 0.016     | 0.000       | 0.000        | 0.016    | 0.000    |
| 34         | Bilophila            | 7      | 0.476         | 0.131     | 0.555       | 0.091        | 0.015    | 0.091    |
| 35         | Peptoniphilus        | 3      | 0.333         | 0.112     | 0.342       | 0.001        | 0.015    | 0.001    |
| 36         | Eggerthella          | 8      | 0.857         | 0.130     | 0.013       | 0.130        | 0.015    | 0.130    |
| 37         | Blautia              | 13     | 0.615         | 0.126     | 0.042       | 0.235        | 0.021    | 0.235    |
| 38         | Capnocytophaga       | 9      | 0.417         | 0.129     | 0.170       | 0.126        | 0.017    | 0.126    |
| 39         | Coproccoccus         | 11     | 0.582         | 0.125     | 0.134       | 0.175        | 0.020    | 0.175    |
| 40         | Dorea                | 8      | 0.821         | 0.121     | 0.005       | 0.140        | 0.014    | 0.140    |
| 41         | Roseburia            | 11     | 0.709         | 0.125     | 0.015       | 0.199        | 0.018    | 0.199    |
| 42         | Ruminococcus         | 12     | 0.606         | 0.126     | 0.041       | 0.216        | 0.020    | 0.216    |
| 43         | Selenomonas          | 9      | 0.361         | 0.125     | 0.143       | 0.129        | 0.018    | 0.129    |
| 44         | Campylobacter        | 1      | 0.000         | 0.016     | 0.000       | 1.13E-18     | 0.012    | 2.79E-18 |
| 45         | Helicobacter         | 2      | 0.000         | 0.016     | 0.002       | 3.53E-18     | 0.023    | 5.59E-18 |
| 46         | Mitsuokella          | 4      | 0.667         | 0.122     | 0.002       | 0.042        | 0.009    | 0.042    |
| 47         | Porphyromonas        | 5      | 0.500         | 0.124     | 0.012       | 0.066        | 0.010    | 0.066    |
| 48         | Citrobacter          | 2      | 1.000         | 0.090     | 0.000       | 7.95E-06     | 0.010    | 7.95E-06 |
| 49         | Escherichia          | 5      | 0.500         | 0.098     | 0.115       | 4.38E-05     | 0.022    | 4.38E-05 |
| 50         | Shigella             | 5      | 0.500         | 0.098     | 0.115       | 4.38E-05     | 0.022    | 4.38E-05 |

India

|    |                  |    |       |       |       |          |       |          |
|----|------------------|----|-------|-------|-------|----------|-------|----------|
| 51 | Clostridium      | 5  | 0.700 | 0.125 | 0.020 | 0.094    | 0.010 | 0.094    |
| 52 | Collinsella      | 1  | 0.000 | 0.112 | 0.000 | 0.012    | 0.004 | 0.012    |
| 53 | Fusobacterium    | 2  | 1.000 | 0.102 | 0.000 | 8.77E-05 | 0.012 | 8.77E-05 |
| 54 | Shuttleworthia   | 1  | 0.000 | 0.112 | 0.000 | 0.016    | 0.004 | 0.016    |
| 55 | Dialister        | 9  | 0.639 | 0.130 | 0.119 | 0.143    | 0.016 | 0.143    |
| 56 | Pseudoramibacter | 8  | 0.929 | 0.130 | 0.002 | 0.140    | 0.014 | 0.140    |
| 57 | Pyramidobacter   | 10 | 0.800 | 0.132 | 0.011 | 0.183    | 0.017 | 0.183    |
| 58 | Enterobacter     | 2  | 0.000 | 0.115 | 0.646 | 0.004    | 0.008 | 0.004    |
| 59 | Klebsiella       | 4  | 0.500 | 0.106 | 0.549 | 0.000    | 0.017 | 0.000    |
| 60 | Streptococcus    | 2  | 1.000 | 0.090 | 0.000 | 7.95E-06 | 0.010 | 7.95E-06 |
| 61 | Veillonella      | 3  | 1.000 | 0.098 | 0.000 | 4.25E-05 | 0.013 | 4.25E-05 |
| 62 | Haemophilus      | 2  | 1.000 | 0.108 | 0.000 | 0.001    | 0.007 | 0.001    |
| 63 | Lactobacillus    | 1  | 0.000 | 0.016 | 0.000 | 0.000    | 0.012 | 2.79E-18 |
| 64 | Megasphaera      | 1  | 0.000 | 0.117 | 0.000 | 0.015    | 0.004 | 0.015    |

Mutual exclusion network

| Node_Index | Label           | Degree | Cluster_Coeff | Closeness | Betweenness | Eigen_Vector | PageRank | HubScore |
|------------|-----------------|--------|---------------|-----------|-------------|--------------|----------|----------|
| 1          | Anaerotruncus   | 1      | 0.000         | 0.200     | 0.000       | 1.30E-16     | 0.167    | 5.55E-17 |
| 2          | Streptococcus   | 1      | 0.000         | 0.200     | 0.000       | 1.76E-16     | 0.167    | 5.55E-17 |
| 3          | Bifidobacterium | 1      | 0.000         | 0.294     | 0.000       | 0.408        | 0.116    | 0.500    |
| 4          | Paraprevotella  | 3      | 0.000         | 0.333     | 1.000       | 0.707        | 0.320    | 0.000    |
| 5          | Eggerthella     | 1      | 0.000         | 0.294     | 0.000       | 0.408        | 0.116    | 0.500    |
| 6          | Peptoniphilus   | 1      | 0.000         | 0.294     | 0.000       | 0.408        | 0.116    | 0.500    |

## Italy

## Co-occurrence network

| Node_Index | Label                | Degree | Cluster_Coeff | Closeness | Betweenness | Eigen_Vector | PageRank | HubScore |
|------------|----------------------|--------|---------------|-----------|-------------|--------------|----------|----------|
| 1          | Acidovorax           | 3      | 1             | 0.019     | 0.000       | 0.000        | 0.018    | 1.58E-17 |
| 2          | Geobacter            | 3      | 1             | 0.019     | 0.000       | 0.000        | 0.018    | 1.58E-17 |
| 3          | Thermomonospora      | 3      | 1             | 0.019     | 0.000       | 0.000        | 0.018    | 1.58E-17 |
| 4          | Thioalkalivibrio     | 3      | 1             | 0.019     | 0.000       | 0.000        | 0.018    | 1.58E-17 |
| 5          | Actinosynnema        | 7      | 1             | 0.021     | 0.000       | 0.354        | 0.018    | 0.354    |
| 6          | Dermacoccus          | 7      | 1             | 0.021     | 0.000       | 0.354        | 0.018    | 0.354    |
| 7          | Edwardsiella         | 7      | 1             | 0.021     | 0.000       | 0.354        | 0.018    | 0.354    |
| 8          | Haliangium           | 7      | 1             | 0.021     | 0.000       | 0.354        | 0.018    | 0.354    |
| 9          | Jonquetella          | 7      | 1             | 0.021     | 0.000       | 0.354        | 0.018    | 0.354    |
| 10         | Myxococcus           | 7      | 1             | 0.021     | 0.000       | 0.354        | 0.018    | 0.354    |
| 11         | Robiginitalea        | 7      | 1             | 0.021     | 0.000       | 0.354        | 0.018    | 0.354    |
| 12         | Streptosporangium    | 7      | 1             | 0.021     | 0.000       | 0.354        | 0.018    | 0.354    |
| 13         | Alkalilimnicola      | 2      | 1             | 0.019     | 0.000       | 0.000        | 0.018    | 1.81E-17 |
| 14         | Kytococcus           | 2      | 1             | 0.019     | 0.000       | 0.000        | 0.018    | 1.81E-17 |
| 15         | Rhodospirillum       | 2      | 1             | 0.019     | 0.000       | 0.000        | 0.018    | 1.81E-17 |
| 16         | Anaeromyxobacter     | 2      | 1             | 0.019     | 0.000       | 0.000        | 0.018    | 1.81E-17 |
| 17         | Desmospora           | 2      | 1             | 0.019     | 0.000       | 0.000        | 0.018    | 1.81E-17 |
| 18         | Kineococcus          | 2      | 1             | 0.019     | 0.000       | 0.000        | 0.018    | 1.81E-17 |
| 19         | Azoarcus             | 1      | 0             | 0.019     | 0.000       | 0.000        | 0.018    | 2.96E-18 |
| 20         | Pseudoflavonifractor | 1      | 0             | 0.019     | 0.000       | 4.32E-18     | 0.018    | 2.96E-18 |
| 21         | Beutenbergia         | 1      | 0             | 0.019     | 0.000       | 0.000        | 0.018    | 2.96E-18 |
| 22         | Desulfitobacterium   | 1      | 0             | 0.019     | 0.000       | 0.000        | 0.018    | 2.96E-18 |
| 23         | Blattabacterium      | 4      | 1             | 0.020     | 0.000       | 0.000        | 0.018    | 3.63E-17 |
| 24         | Citrobacter          | 4      | 1             | 0.020     | 0.000       | 0.000        | 0.018    | 3.63E-17 |
| 25         | Enterobacter         | 4      | 1             | 0.020     | 0.000       | 0.000        | 0.018    | 3.63E-17 |
| 26         | Methanocorpusculum   | 4      | 1             | 0.020     | 0.000       | 0.000        | 0.018    | 3.63E-17 |
| 27         | Streptobacillus      | 4      | 1             | 0.020     | 0.000       | 0.000        | 0.018    | 3.63E-17 |
| 28         | Caldanaerobacter     | 3      | 1             | 0.019     | 0.000       | 0.000        | 0.018    | 1.58E-17 |
| 29         | Nocardioides         | 3      | 1             | 0.019     | 0.000       | 0.000        | 0.018    | 1.58E-17 |
| 30         | Phenyllobacterium    | 3      | 1             | 0.019     | 0.000       | 0.000        | 0.018    | 1.58E-17 |
| 31         | Syntrophomonas       | 3      | 1             | 0.019     | 0.000       | 0.000        | 0.018    | 1.58E-17 |
| 32         | Carboxydotherrmus    | 2      | 1             | 0.019     | 0.000       | 0.000        | 0.018    | 1.81E-17 |
| 33         | Methylococcus        | 2      | 1             | 0.019     | 0.000       | 0.000        | 0.018    | 1.81E-17 |
| 34         | Opitutus             | 2      | 1             | 0.019     | 0.000       | 0.000        | 0.018    | 1.81E-17 |
| 35         | Chlorobaculum        | 1      | 0             | 0.019     | 0.000       | 0.000        | 0.018    | 2.96E-18 |
| 36         | Holdemania           | 1      | 0             | 0.019     | 0.000       | 0.000        | 0.018    | 2.96E-18 |
| 37         | Cronobacter          | 2      | 1             | 0.019     | 0.000       | 0.000        | 0.018    | 1.81E-17 |
| 38         | Klebsiella           | 2      | 1             | 0.019     | 0.000       | 0.000        | 0.018    | 1.81E-17 |
| 39         | Salmonella           | 2      | 1             | 0.019     | 0.000       | 0.000        | 0.018    | 1.81E-17 |
| 40         | Deinococcus          | 1      | 0             | 0.019     | 0.000       | 0.000        | 0.018    | 2.96E-18 |
| 41         | Erythrobacter        | 1      | 0             | 0.019     | 0.000       | 0.000        | 0.018    | 2.96E-18 |
| 42         | Heliobacterium       | 3      | 1             | 0.019     | 0.000       | 0.000        | 0.018    | 1.58E-17 |
| 43         | Pelotomaculum        | 3      | 1             | 0.019     | 0.000       | 0.000        | 0.018    | 1.58E-17 |
| 44         | Pseudoramibacter     | 3      | 1             | 0.019     | 0.000       | 0.000        | 0.018    | 1.58E-17 |
| 45         | Thermanaerovibrio    | 3      | 1             | 0.019     | 0.000       | 0.000        | 0.018    | 1.58E-17 |
| 46         | Pelobacter           | 1      | 0             | 0.019     | 0.000       | 0.000        | 0.018    | 2.96E-18 |
| 47         | Treponema            | 1      | 0             | 0.019     | 0.000       | 0.000        | 0.018    | 2.96E-18 |
| 48         | Peptoniphilus        | 1      | 0             | 0.019     | 0.000       | 0.000        | 0.018    | 2.96E-18 |
| 49         | Solobacterium        | 1      | 0             | 0.019     | 0.000       | 1.40E-18     | 0.018    | 2.96E-18 |
| 50         | Rhodothermus         | 3      | 1             | 0.019     | 0.000       | 0.000        | 0.018    | 1.58E-17 |
| 51         | Rubrobacter          | 3      | 1             | 0.019     | 0.000       | 0.000        | 0.018    | 1.58E-17 |

## Italy

|    |                 |   |   |       |       |       |       |          |
|----|-----------------|---|---|-------|-------|-------|-------|----------|
| 52 | Sphaerobacter   | 3 | 1 | 0.019 | 0.000 | 0.000 | 0.018 | 1.58E-17 |
| 53 | Symbiobacterium | 3 | 1 | 0.019 | 0.000 | 0.000 | 0.018 | 1.58E-17 |
| 54 | Rothia          | 1 | 0 | 0.019 | 0.000 | 0.000 | 0.018 | 2.96E-18 |
| 55 | Streptococcus   | 1 | 0 | 0.019 | 0.000 | 0.000 | 0.018 | 2.96E-18 |

## Mutual exclusion network

| Node_Index | Label              | Degree | Cluster_Coeff | Closeness | Betweenness | Eigen_Vector | PageRank | HubScore |
|------------|--------------------|--------|---------------|-----------|-------------|--------------|----------|----------|
| 1          | Akkermansia        | 1      | 0             | 0.043     | 0.000       | 0.000        | 0.042    | 1.63E-17 |
| 2          | Haemophilus        | 1      | 0             | 0.043     | 0.000       | 0.000        | 0.042    | 1.63E-17 |
| 3          | Alistipes          | 2      | 0             | 0.045     | 0.167       | 0.000        | 0.061    | 1.26E-16 |
| 4          | Rothia             | 1      | 0             | 0.045     | 0.000       | 0.000        | 0.032    | 6.32E-17 |
| 5          | Streptococcus      | 1      | 0             | 0.045     | 0.000       | 0.000        | 0.032    | 6.32E-17 |
| 6          | Caldanaerobacter   | 1      | 0             | 0.050     | 0.000       | 0.354        | 0.027    | 0.224    |
| 7          | Faecalibacterium   | 4      | 0             | 0.050     | 1.000       | 0.707        | 0.099    | 0.894    |
| 8          | Collinsella        | 1      | 0             | 0.043     | 0.000       | 0.000        | 0.042    | 1.63E-17 |
| 9          | Eggerthella        | 1      | 0             | 0.043     | 0.000       | 0.000        | 0.042    | 1.63E-17 |
| 10         | Desulfovibrio      | 1      | 0             | 0.043     | 0.000       | 0.000        | 0.042    | 1.63E-17 |
| 11         | Thiobacillus       | 1      | 0             | 0.043     | 0.000       | 0.000        | 0.042    | 1.63E-17 |
| 12         | Dorea              | 1      | 0             | 0.043     | 0.000       | 0.000        | 0.042    | 1.63E-17 |
| 13         | Shigella           | 1      | 0             | 0.043     | 0.000       | 0.000        | 0.042    | 1.63E-17 |
| 14         | Nocardioides       | 1      | 0             | 0.050     | 0.000       | 0.354        | 0.027    | 0.224    |
| 15         | Phenylobacterium   | 1      | 0             | 0.050     | 0.000       | 0.354        | 0.027    | 0.224    |
| 16         | Syntrophomonas     | 1      | 0             | 0.050     | 0.000       | 0.354        | 0.027    | 0.224    |
| 17         | Fusobacterium      | 1      | 0             | 0.043     | 0.000       | 0.000        | 0.042    | 1.63E-17 |
| 18         | Turicibacter       | 1      | 0             | 0.043     | 0.000       | 0.000        | 0.042    | 1.63E-17 |
| 19         | Lautropia          | 1      | 0             | 0.043     | 0.000       | 0.000        | 0.042    | 1.63E-17 |
| 20         | Mitsuokella        | 1      | 0             | 0.043     | 0.000       | 0.000        | 0.042    | 1.63E-17 |
| 21         | Leptothrix         | 1      | 0             | 0.043     | 0.000       | 0.000        | 0.042    | 1.63E-17 |
| 22         | Thermoanaerobacter | 1      | 0             | 0.043     | 0.000       | 0.000        | 0.042    | 1.63E-17 |
| 23         | Pyramidobacter     | 1      | 0             | 0.043     | 0.000       | 0.000        | 0.042    | 1.63E-17 |
| 24         | Subdoligranulum    | 1      | 0             | 0.043     | 0.000       | 0.000        | 0.042    | 1.63E-17 |



## Japan

## Co-occurrence network

| Node_Index | Label                 | Degree | Cluster_Coeff | Closeness | Betweenness | Eigen_Vector | PageRank | HubScore |
|------------|-----------------------|--------|---------------|-----------|-------------|--------------|----------|----------|
| 1          | Abiotrophia           | 4      | 0.333         | 0.069     | 0.436       | 0.016        | 0.009    | 0.0163   |
| 2          | Anaerofustis          | 3      | 0.333         | 0.065     | 0.150       | 0.001        | 0.011    | 0.0009   |
| 3          | Finegoldia            | 2      | 1.000         | 0.065     | 0.000       | 0.001        | 0.007    | 0.0009   |
| 4          | Holdemania            | 24     | 0.475         | 0.072     | 0.538       | 0.181        | 0.020    | 0.1813   |
| 5          | Roseburia             | 20     | 0.437         | 0.072     | 0.374       | 0.134        | 0.018    | 0.1338   |
| 6          | Acetivibrio           | 2      | 0.000         | 0.068     | 0.002       | 0.011        | 0.003    | 0.0115   |
| 7          | Alistipes             | 22     | 0.442         | 0.071     | 0.321       | 0.155        | 0.019    | 0.1550   |
| 8          | Blautia               | 13     | 0.410         | 0.070     | 0.165       | 0.068        | 0.013    | 0.0676   |
| 9          | Achromobacter         | 2      | 1.000         | 0.059     | 0.000       | 1.91E-06     | 0.008    | 1.91E-06 |
| 10         | Cronobacter           | 4      | 0.333         | 0.062     | 0.295       | 3.53E-05     | 0.014    | 3.53E-05 |
| 11         | Serratia              | 2      | 1.000         | 0.059     | 0.000       | 1.91E-06     | 0.008    | 1.91E-06 |
| 12         | Acidaminococcus       | 3      | 0.667         | 0.065     | 0.208       | 0.000        | 0.010    | 0.0003   |
| 13         | Megasphaera           | 4      | 0.333         | 0.069     | 0.957       | 0.006        | 0.009    | 0.0062   |
| 14         | Mitsuokella           | 5      | 0.300         | 0.066     | 0.503       | 0.000        | 0.016    | 0.0003   |
| 15         | Actinomyces           | 1      | 0.000         | 0.012     | 0.000       | 1.58E-18     | 0.012    | 0.0000   |
| 16         | Rothia                | 1      | 0.000         | 0.012     | 0.000       | 4.31E-18     | 0.012    | 0.0000   |
| 17         | Akkermansia           | 3      | 0.667         | 0.068     | 0.002       | 0.020        | 0.004    | 0.0202   |
| 18         | Bilophila             | 11     | 0.327         | 0.070     | 0.112       | 0.054        | 0.011    | 0.0542   |
| 19         | Haemophilus           | 22     | 0.563         | 0.071     | 0.107       | 0.184        | 0.017    | 0.1837   |
| 20         | Alicyclobacillus      | 25     | 0.517         | 0.072     | 0.195       | 0.207        | 0.019    | 0.2073   |
| 21         | Alkaliphilus          | 18     | 0.490         | 0.071     | 0.140       | 0.128        | 0.015    | 0.1280   |
| 22         | Anaerotruncus         | 23     | 0.553         | 0.072     | 0.121       | 0.187        | 0.018    | 0.1869   |
| 23         | Collinsella           | 13     | 0.744         | 0.071     | 0.021       | 0.126        | 0.011    | 0.1261   |
| 24         | Cryptobacterium       | 29     | 0.510         | 0.072     | 0.164       | 0.240        | 0.022    | 0.2403   |
| 25         | Desulfomicrobium      | 26     | 0.486         | 0.072     | 0.288       | 0.198        | 0.020    | 0.1982   |
| 26         | Desulfotomaculum      | 17     | 0.566         | 0.071     | 0.046       | 0.132        | 0.014    | 0.1320   |
| 27         | Faecalibacterium      | 16     | 0.383         | 0.072     | 1.000       | 0.090        | 0.015    | 0.0901   |
| 28         | Fibrobacter           | 28     | 0.550         | 0.072     | 0.113       | 0.240        | 0.021    | 0.2396   |
| 29         | Heliobacterium        | 25     | 0.540         | 0.072     | 0.083       | 0.213        | 0.019    | 0.2126   |
| 30         | Lautropia             | 14     | 0.736         | 0.070     | 0.018       | 0.121        | 0.011    | 0.1209   |
| 31         | Moorella              | 24     | 0.562         | 0.072     | 0.108       | 0.205        | 0.018    | 0.2053   |
| 32         | Paraprevotella        | 10     | 0.422         | 0.070     | 0.051       | 0.049        | 0.010    | 0.0494   |
| 33         | Phascolarctobacterium | 19     | 0.532         | 0.071     | 0.094       | 0.150        | 0.015    | 0.1496   |
| 34         | Pseudoflavonifractor  | 23     | 0.589         | 0.071     | 0.070       | 0.196        | 0.017    | 0.1961   |
| 35         | Pyramidobacter        | 28     | 0.550         | 0.072     | 0.105       | 0.242        | 0.021    | 0.2416   |
| 36         | Slackia               | 14     | 0.879         | 0.070     | 0.003       | 0.135        | 0.011    | 0.1351   |
| 37         | Subdoligranulum       | 15     | 0.590         | 0.071     | 0.087       | 0.133        | 0.012    | 0.1325   |
| 38         | Symbiobacterium       | 22     | 0.662         | 0.071     | 0.033       | 0.202        | 0.016    | 0.2024   |
| 39         | Syntrophomonas        | 22     | 0.576         | 0.071     | 0.196       | 0.186        | 0.018    | 0.1858   |
| 40         | Thioalkalivibrio      | 21     | 0.629         | 0.071     | 0.055       | 0.184        | 0.016    | 0.1838   |
| 41         | Treponema             | 17     | 0.515         | 0.072     | 0.211       | 0.118        | 0.015    | 0.1179   |
| 42         | Bulleidia             | 21     | 0.548         | 0.071     | 0.096       | 0.170        | 0.016    | 0.1697   |
| 43         | Desulfitobacterium    | 14     | 0.648         | 0.071     | 0.050       | 0.115        | 0.012    | 0.1151   |
| 44         | Dysgonomonas          | 18     | 0.510         | 0.071     | 0.102       | 0.127        | 0.015    | 0.1267   |
| 45         | Oxalobacter           | 3      | 0.333         | 0.068     | 0.150       | 0.018        | 0.006    | 0.0176   |
| 46         | Paenibacillus         | 12     | 0.470         | 0.071     | 0.086       | 0.086        | 0.011    | 0.0858   |
| 47         | Porphyromonas         | 9      | 0.500         | 0.070     | 0.029       | 0.051        | 0.009    | 0.0512   |
| 48         | Pseudoramibacter      | 11     | 0.673         | 0.070     | 0.015       | 0.087        | 0.010    | 0.0865   |
| 49         | Selenomonas           | 21     | 0.529         | 0.072     | 0.164       | 0.170        | 0.017    | 0.1702   |
| 50         | Shuttleworthia        | 18     | 0.654         | 0.071     | 0.036       | 0.156        | 0.014    | 0.1559   |
| 51         | Sutterella            | 8      | 0.393         | 0.071     | 0.084       | 0.039        | 0.008    | 0.0390   |

Japan

|    |                    |    |       |       |       |          |       |          |
|----|--------------------|----|-------|-------|-------|----------|-------|----------|
| 52 | Thermanaerovibrio  | 20 | 0.653 | 0.071 | 0.047 | 0.180    | 0.015 | 0.1800   |
| 53 | Butyrivibrio       | 10 | 0.400 | 0.070 | 0.119 | 0.039    | 0.011 | 0.0385   |
| 54 | Eubacterium        | 7  | 0.429 | 0.069 | 0.166 | 0.021    | 0.009 | 0.0214   |
| 55 | Oribacterium       | 17 | 0.493 | 0.072 | 0.112 | 0.116    | 0.014 | 0.1164   |
| 56 | Solobacterium      | 10 | 0.533 | 0.070 | 0.302 | 0.066    | 0.012 | 0.0662   |
| 57 | Succinatimonas     | 9  | 0.500 | 0.070 | 0.035 | 0.054    | 0.009 | 0.0540   |
| 58 | Anaerococcus       | 1  | 0.000 | 0.012 | 0.000 | 4.81E-18 | 0.008 | 0.0000   |
| 59 | Staphylococcus     | 2  | 0.000 | 0.012 | 0.004 | 8.15E-18 | 0.015 | 0.0000   |
| 60 | Variovorax         | 1  | 0.000 | 0.062 | 0.000 | 4.57E-05 | 0.005 | 4.57E-05 |
| 61 | Anaerostipes       | 2  | 1.000 | 0.012 | 0.000 | 6.05E-18 | 0.012 | 0.0000   |
| 62 | Clostridium        | 3  | 0.333 | 0.012 | 0.004 | 1.86E-18 | 0.017 | 0.0000   |
| 63 | Eggerthella        | 2  | 1.000 | 0.012 | 0.000 | 7.56E-18 | 0.012 | 0.0000   |
| 64 | Parabacteroides    | 9  | 0.333 | 0.070 | 0.036 | 0.040    | 0.009 | 0.0404   |
| 65 | Bacteroides        | 6  | 0.467 | 0.069 | 0.019 | 0.013    | 0.007 | 0.0134   |
| 66 | Peptostreptococcus | 10 | 0.289 | 0.070 | 0.101 | 0.045    | 0.010 | 0.0446   |
| 67 | Thiobacillus       | 9  | 0.389 | 0.070 | 0.056 | 0.031    | 0.009 | 0.0312   |
| 68 | Bifidobacterium    | 2  | 0.000 | 0.012 | 0.004 | 1.01E-17 | 0.015 | 0.0000   |
| 69 | Peptoniphilus      | 1  | 0.000 | 0.012 | 0.000 | 7.59E-19 | 0.008 | 0.0000   |
| 70 | Prevotella         | 13 | 0.603 | 0.070 | 0.028 | 0.093    | 0.011 | 0.0928   |
| 71 | Coprobacillus      | 2  | 1.000 | 0.067 | 0.000 | 0.005    | 0.004 | 0.0055   |
| 72 | Dialister          | 4  | 0.833 | 0.069 | 0.000 | 0.026    | 0.005 | 0.0256   |
| 73 | Capnocytophaga     | 13 | 0.487 | 0.071 | 0.079 | 0.089    | 0.011 | 0.0886   |
| 74 | Desulfovibrio      | 6  | 0.600 | 0.070 | 0.148 | 0.030    | 0.007 | 0.0300   |
| 75 | Catenibacterium    | 2  | 1.000 | 0.067 | 0.000 | 0.004    | 0.005 | 0.0036   |
| 76 | Gemella            | 2  | 1.000 | 0.067 | 0.000 | 0.004    | 0.005 | 0.0036   |
| 77 | Chromobacterium    | 1  | 0.000 | 0.064 | 0.000 | 0.001    | 0.004 | 0.0009   |
| 78 | Citrobacter        | 2  | 1.000 | 0.062 | 0.000 | 1.85E-05 | 0.008 | 1.85E-05 |
| 79 | Enterobacter       | 2  | 1.000 | 0.062 | 0.000 | 1.85E-05 | 0.008 | 1.85E-05 |
| 80 | Ruminococcus       | 1  | 0.000 | 0.012 | 0.000 | 6.88E-18 | 0.007 | 0.0000   |
| 81 | Coprococcus        | 6  | 1.000 | 0.070 | 0.000 | 0.040    | 0.006 | 0.0401   |
| 82 | Dorea              | 1  | 0.000 | 0.066 | 0.000 | 0.001    | 0.003 | 0.0011   |
| 83 | Pelotomaculum      | 1  | 0.000 | 0.012 | 0.000 | 3.16E-18 | 0.012 | 0.0000   |
| 84 | Scardovia          | 1  | 0.000 | 0.012 | 0.000 | 0.000    | 0.012 | 0.0000   |

Mutual exclusion network

| Node_Index | Label            | Degree | Cluster_Coeff | Closeness | Betweenness | Eigen_Vector | PageRank  | HubScore |
|------------|------------------|--------|---------------|-----------|-------------|--------------|-----------|----------|
| 1          | Acetivibrio      | 1      | 0.000         | 0.130     | 0.000       | 0.159        | 6.29E+14  | 0.2246   |
| 2          | Mobiluncus       | 7      | 0.000         | 0.144     | 1.000       | 0.480        | -3.53E+15 | 0.0072   |
| 3          | Alistipes        | 1      | 0.000         | 0.118     | 0.000       | 0.101        | -5.55E+14 | 0.1428   |
| 4          | Stenotrophomonas | 6      | 0.000         | 0.130     | 0.528       | 0.305        | 2.67E+15  | 0.0046   |
| 5          | Anaerotruncus    | 1      | 0.000         | 0.130     | 0.000       | 0.159        | 6.29E+14  | 0.2246   |
| 6          | Bacteroides      | 2      | 0.000         | 0.141     | 0.719       | 0.298        | 4.95E+14  | 0.4208   |
| 7          | Enterococcus     | 8      | 0.000         | 0.137     | 0.839       | 0.419        | 8.61E+14  | 0.0063   |
| 8          | Capnocytophaga   | 1      | 0.000         | 0.124     | 0.000       | 0.139        | -1.34E+14 | 0.1962   |
| 9          | Clostridium      | 2      | 0.000         | 0.042     | 0.007       | 1.70E-17     | -0.418    | 0.0000   |
| 10         | Pelotomaculum    | 1      | 0.000         | 0.042     | 0.000       | 5.20E-18     | -0.070    | 0.0000   |
| 11         | Scardovia        | 1      | 0.000         | 0.042     | 0.000       | 1.39E-17     | 0.050     | 0.0000   |
| 12         | Dysgonomonas     | 2      | 0.000         | 0.137     | 0.262       | 0.260        | 7.40E+13  | 0.3675   |
| 13         | Heliobacterium   | 1      | 0.000         | 0.124     | 0.000       | 0.139        | -1.34E+14 | 0.1962   |
| 14         | Paenibacillus    | 1      | 0.000         | 0.124     | 0.000       | 0.139        | -1.34E+14 | 0.1962   |
| 15         | Parabacteroides  | 1      | 0.000         | 0.124     | 0.000       | 0.139        | -1.34E+14 | 0.1962   |

Japan

|    |                  |   |       |       |       |          |           |        |
|----|------------------|---|-------|-------|-------|----------|-----------|--------|
| 16 | Paraprevotella   | 1 | 0.000 | 0.124 | 0.000 | 0.139    | -1.34E+14 | 0.1962 |
| 17 | Prevotella       | 1 | 0.000 | 0.124 | 0.000 | 0.139    | -1.34E+14 | 0.1962 |
| 18 | Thiobacillus     | 1 | 0.000 | 0.124 | 0.000 | 0.139    | -1.34E+14 | 0.1962 |
| 19 | Haemophilus      | 1 | 0.000 | 0.130 | 0.000 | 0.159    | 6.29E+14  | 0.2246 |
| 20 | Porphyromonas    | 1 | 0.000 | 0.130 | 0.000 | 0.159    | 6.29E+14  | 0.2246 |
| 21 | Sutterella       | 2 | 0.000 | 0.137 | 0.262 | 0.260    | 7.40E+13  | 0.3675 |
| 22 | Pseudoramibacter | 1 | 0.000 | 0.118 | 0.000 | 0.101    | -5.55E+14 | 0.1428 |
| 23 | Selenomonas      | 1 | 0.000 | 0.118 | 0.000 | 0.101    | -5.55E+14 | 0.1428 |
| 24 | Shigella         | 1 | 0.000 | 0.040 | 0.000 | 1.95E-18 | -0.053    | 0.0000 |
| 25 | Variovorax       | 1 | 0.000 | 0.040 | 0.000 | 0.000    | -0.168    | 0.0000 |
| 26 | Shuttleworthia   | 1 | 0.000 | 0.118 | 0.000 | 0.101    | -5.55E+14 | 0.1428 |

## Spain

## Co-occurrence network

| Node_Index | Label                | Degree | Cluster_Coeff | Closeness | Betweenness | Eigen_Vector | PageRank | HubScore |
|------------|----------------------|--------|---------------|-----------|-------------|--------------|----------|----------|
| 1          | Abiotrophia          | 3      | 0.333         | 0.065     | 0.214       | 0.006        | 0.011    | 0.006    |
| 2          | Butyrivibrio         | 5      | 0.400         | 0.067     | 0.444       | 0.017        | 0.014    | 0.017    |
| 3          | Eubacterium          | 2      | 0.000         | 0.064     | 0.171       | 0.002        | 0.009    | 0.002    |
| 4          | Streptobacillus      | 8      | 0.500         | 0.067     | 0.320       | 0.026        | 0.020    | 0.026    |
| 5          | Acetivibrio          | 4      | 0.333         | 0.069     | 0.796       | 0.042        | 0.010    | 0.042    |
| 6          | Desulfitobacterium   | 6      | 0.467         | 0.069     | 0.370       | 0.151        | 0.015    | 0.151    |
| 7          | Finegoldia           | 9      | 0.556         | 0.068     | 1.000       | 0.038        | 0.021    | 0.038    |
| 8          | Leptotrichia         | 8      | 0.714         | 0.067     | 0.361       | 0.033        | 0.018    | 0.033    |
| 9          | Moorella             | 7      | 0.381         | 0.069     | 0.498       | 0.117        | 0.018    | 0.117    |
| 10         | Acholeplasma         | 3      | 1.000         | 0.064     | 0.000       | 0.010        | 0.008    | 0.010    |
| 11         | Anaerococcus         | 9      | 0.639         | 0.066     | 0.116       | 0.032        | 0.021    | 0.032    |
| 12         | Mesoplasma           | 4      | 0.833         | 0.064     | 0.002       | 0.014        | 0.010    | 0.014    |
| 13         | Thermoanaerobacter   | 12     | 0.439         | 0.067     | 0.464       | 0.036        | 0.028    | 0.036    |
| 14         | Aerococcus           | 1      | 0.000         | 0.063     | 0.000       | 0.004        | 0.004    | 0.004    |
| 15         | Akkermansia          | 2      | 1.000         | 0.063     | 0.000       | 0.013        | 0.008    | 0.013    |
| 16         | Magnetospirillum     | 5      | 0.500         | 0.067     | 0.161       | 0.062        | 0.015    | 0.062    |
| 17         | Rhodospirillum       | 4      | 0.667         | 0.066     | 0.046       | 0.042        | 0.013    | 0.042    |
| 18         | Alicyclobacillus     | 10     | 0.422         | 0.069     | 0.265       | 0.268        | 0.024    | 0.268    |
| 19         | Heliobacterium       | 11     | 0.509         | 0.069     | 0.554       | 0.329        | 0.026    | 0.329    |
| 20         | Holdemania           | 4      | 0.833         | 0.068     | 0.004       | 0.149        | 0.010    | 0.149    |
| 21         | Pelotomaculum        | 9      | 0.250         | 0.070     | 0.699       | 0.176        | 0.024    | 0.176    |
| 22         | Pseudoflavonifractor | 4      | 0.667         | 0.067     | 0.008       | 0.103        | 0.011    | 0.103    |
| 23         | Pseudoramibacter     | 11     | 0.509         | 0.069     | 0.161       | 0.330        | 0.026    | 0.330    |
| 24         | Pyramidobacter       | 13     | 0.397         | 0.070     | 0.813       | 0.362        | 0.030    | 0.362    |
| 25         | Roseomonas           | 10     | 0.311         | 0.069     | 0.912       | 0.160        | 0.029    | 0.160    |
| 26         | Symbiobacterium      | 9      | 0.583         | 0.069     | 0.144       | 0.298        | 0.021    | 0.298    |
| 27         | Alistipes            | 2      | 0.000         | 0.066     | 0.376       | 0.020        | 0.010    | 0.020    |
| 28         | Parabacteroides      | 2      | 0.000         | 0.062     | 0.192       | 0.003        | 0.013    | 0.003    |
| 29         | Alkaliphilus         | 6      | 0.800         | 0.065     | 0.012       | 0.023        | 0.014    | 0.023    |
| 30         | Caldicellulosiruptor | 9      | 0.694         | 0.067     | 0.077       | 0.033        | 0.020    | 0.033    |
| 31         | Fusobacterium        | 9      | 0.611         | 0.066     | 0.204       | 0.031        | 0.021    | 0.031    |
| 32         | Gemella              | 5      | 0.500         | 0.064     | 0.036       | 0.015        | 0.013    | 0.015    |
| 33         | Turicibacter         | 10     | 0.622         | 0.066     | 0.105       | 0.034        | 0.022    | 0.034    |
| 34         | Anaerofustis         | 4      | 0.333         | 0.069     | 0.243       | 0.101        | 0.011    | 0.101    |
| 35         | Eggerthella          | 9      | 0.528         | 0.069     | 0.468       | 0.270        | 0.024    | 0.270    |
| 36         | Peptostreptococcus   | 3      | 0.333         | 0.069     | 0.656       | 0.039        | 0.009    | 0.039    |
| 37         | Anaerostipes         | 2      | 1.000         | 0.015     | 0.000       | 0.000        | 0.015    | 7.97E-18 |
| 38         | Blautia              | 2      | 1.000         | 0.015     | 0.000       | 0.000        | 0.015    | 7.97E-18 |
| 39         | Clostridium          | 2      | 1.000         | 0.015     | 0.000       | 0.000        | 0.015    | 7.97E-18 |
| 40         | Anaerotruncus        | 1      | 0.000         | 0.062     | 0.000       | 0.004        | 0.006    | 0.004    |
| 41         | Subdoligranulum      | 2      | 0.000         | 0.065     | 0.192       | 0.034        | 0.010    | 0.034    |
| 42         | Atopobium            | 6      | 0.533         | 0.067     | 0.224       | 0.165        | 0.018    | 0.165    |
| 43         | Collinsella          | 5      | 0.300         | 0.067     | 0.559       | 0.100        | 0.017    | 0.100    |
| 44         | Mobiluncus           | 1      | 0.000         | 0.063     | 0.000       | 0.020        | 0.005    | 0.020    |
| 45         | Slackia              | 10     | 0.533         | 0.069     | 0.305       | 0.292        | 0.025    | 0.292    |
| 46         | Bacteroides          | 1      | 0.000         | 0.059     | 0.000       | 0.000        | 0.008    | 0.000    |
| 47         | Bifidobacterium      | 1      | 0.000         | 0.063     | 0.000       | 0.012        | 0.005    | 0.012    |
| 48         | Bilophila            | 1      | 0.000         | 0.065     | 0.000       | 0.020        | 0.005    | 0.020    |
| 49         | Bulleidia            | 1      | 0.000         | 0.015     | 0.000       | 0.000        | 0.015    | 3.98E-18 |
| 50         | Granulicatella       | 1      | 0.000         | 0.015     | 0.000       | 0.000        | 0.015    | 3.98E-18 |
| 51         | Oribacterium         | 2      | 0.000         | 0.068     | 0.437       | 0.037        | 0.007    | 0.037    |

## Spain

|    |                   |    |       |       |       |       |       |          |
|----|-------------------|----|-------|-------|-------|-------|-------|----------|
| 52 | Capnocytophaga    | 2  | 1.000 | 0.016 | 0.000 | 0.000 | 0.014 | 1.65E-18 |
| 53 | Paraprevotella    | 2  | 1.000 | 0.016 | 0.000 | 0.000 | 0.014 | 1.65E-18 |
| 54 | Prevotella        | 3  | 0.333 | 0.016 | 0.014 | 0.000 | 0.021 | 2.47E-18 |
| 55 | Coprococcus       | 3  | 0.000 | 0.065 | 0.363 | 0.013 | 0.014 | 0.013    |
| 56 | Dialister         | 1  | 0.000 | 0.062 | 0.000 | 0.002 | 0.006 | 0.002    |
| 57 | Dysgonomonas      | 1  | 0.000 | 0.016 | 0.000 | 0.000 | 0.009 | 0.000    |
| 58 | Porphyromonas     | 2  | 0.000 | 0.016 | 0.011 | 0.000 | 0.016 | 1.65E-18 |
| 59 | Selenomonas       | 10 | 0.467 | 0.069 | 0.579 | 0.283 | 0.025 | 0.283    |
| 60 | Faecalibacterium  | 1  | 0.000 | 0.015 | 0.000 | 0.000 | 0.015 | 3.98E-18 |
| 61 | Roseburia         | 1  | 0.000 | 0.015 | 0.000 | 0.000 | 0.015 | 3.98E-18 |
| 62 | Peptoniphilus     | 2  | 1.000 | 0.063 | 0.000 | 0.006 | 0.006 | 0.006    |
| 63 | Jonquetella       | 7  | 0.429 | 0.068 | 0.198 | 0.110 | 0.019 | 0.110    |
| 64 | Oxalobacter       | 6  | 0.533 | 0.068 | 0.114 | 0.118 | 0.016 | 0.118    |
| 65 | Treponema         | 2  | 1.000 | 0.065 | 0.000 | 0.028 | 0.007 | 0.028    |
| 66 | Mitsuokella       | 2  | 1.000 | 0.066 | 0.000 | 0.071 | 0.006 | 0.071    |
| 67 | Thermanaerovibrio | 1  | 0.000 | 0.066 | 0.000 | 0.022 | 0.005 | 0.022    |
| 68 | Shuttleworthia    | 4  | 1.000 | 0.068 | 0.000 | 0.156 | 0.010 | 0.156    |

## Mutual exclusion network

| Node_Index | Label                 | Degree | Cluster_Coeff | Closeness | Betweenness | Eigen_Vector | PageRank | HubScore |
|------------|-----------------------|--------|---------------|-----------|-------------|--------------|----------|----------|
| 1          | Anaerococcus          | 2      | 0.000         | 0.067     | 0.128       | 0.271        | 0.030    | 0.357    |
| 2          | Bacteroides           | 9      | 0.000         | 0.069     | 1.000       | 0.659        | 0.132    | 0.000    |
| 3          | Parabacteroides       | 3      | 0.000         | 0.066     | 0.151       | 0.192        | 0.046    | 0.000    |
| 4          | Anaerofustis          | 1      | 0.000         | 0.065     | 0.000       | 0.055        | 0.019    | 0.072    |
| 5          | Blautia               | 6      | 0.000         | 0.068     | 0.639       | 0.171        | 0.097    | 0.000    |
| 6          | Anaerostipes          | 3      | 0.000         | 0.040     | 0.100       | 0.000        | 0.053    | 0.000    |
| 7          | Capnocytophaga        | 2      | 0.000         | 0.040     | 0.046       | 0.000        | 0.037    | 7.24E-18 |
| 8          | Paraprevotella        | 1      | 0.000         | 0.040     | 0.000       | 0.000        | 0.020    | 0.000    |
| 9          | Prevotella            | 2      | 0.000         | 0.040     | 0.073       | 0.000        | 0.036    | 0.000    |
| 10         | Caldicellulosiruptor  | 1      | 0.000         | 0.067     | 0.000       | 0.210        | 0.017    | 0.276    |
| 11         | Coprococcus           | 1      | 0.000         | 0.067     | 0.000       | 0.210        | 0.017    | 0.276    |
| 12         | Eubacterium           | 1      | 0.000         | 0.067     | 0.000       | 0.210        | 0.017    | 0.276    |
| 13         | Finegoldia            | 2      | 0.000         | 0.067     | 0.128       | 0.271        | 0.030    | 0.357    |
| 14         | Mitsuokella           | 1      | 0.000         | 0.067     | 0.000       | 0.210        | 0.017    | 0.276    |
| 15         | Selenomonas           | 2      | 0.000         | 0.068     | 0.603       | 0.264        | 0.031    | 0.348    |
| 16         | Streptobacillus       | 1      | 0.000         | 0.067     | 0.000       | 0.210        | 0.017    | 0.276    |
| 17         | Thermoanaerobacter    | 1      | 0.000         | 0.067     | 0.000       | 0.210        | 0.017    | 0.276    |
| 18         | Eggerthella           | 1      | 0.000         | 0.065     | 0.000       | 0.055        | 0.019    | 0.072    |
| 19         | Pyramidobacter        | 1      | 0.000         | 0.065     | 0.000       | 0.055        | 0.019    | 0.072    |
| 20         | Shuttleworthia        | 1      | 0.000         | 0.065     | 0.000       | 0.055        | 0.019    | 0.072    |
| 21         | Slackia               | 1      | 0.000         | 0.065     | 0.000       | 0.055        | 0.019    | 0.072    |
| 22         | Bulleidia             | 1      | 0.000         | 0.034     | 0.000       | 0.000        | 0.025    | 0.000    |
| 23         | Dysgonomonas          | 2      | 0.000         | 0.034     | 0.009       | 0.000        | 0.047    | 0.000    |
| 24         | Clostridium           | 1      | 0.000         | 0.039     | 0.000       | 0.000        | 0.021    | 0.000    |
| 25         | Dialister             | 2      | 0.000         | 0.034     | 0.009       | 0.000        | 0.047    | 0.000    |
| 26         | Lawsonia              | 1      | 0.000         | 0.034     | 0.000       | 0.000        | 0.025    | 0.000    |
| 27         | Phascolarctobacterium | 1      | 0.000         | 0.034     | 0.000       | 0.000        | 0.025    | 0.000    |
| 28         | Granulicatella        | 1      | 0.000         | 0.034     | 0.000       | 0.000        | 0.025    | 0.000    |
| 29         | Solobacterium         | 1      | 0.000         | 0.063     | 0.000       | 0.061        | 0.018    | 0.081    |
| 30         | Porphyromonas         | 1      | 0.000         | 0.039     | 0.000       | 0.000        | 0.021    | 0.000    |
| 31         | Ruminococcus          | 2      | 0.000         | 0.040     | 0.046       | 0.000        | 0.038    | 0.000    |
