# Supplementary material for: Global investigation of composition and interaction networks in gut microbiomes of individuals belonging to diverse geographies and age-groups
Source: PubMed Central journal article supplement (PMC4858888; doi:10.1186/s13099-016-0099-z), 2016-05-06
Supplement: 13099_2016_99_MOESM11_ESM.pdf [file 13099_2016_99_MOESM11_ESM.pdf]

**Additional File 11: Centrality measures of different genera in the gut microbiomes of common nodes between combination of geographies for co-occurrence and mutual exclusion networks**

America + China

Co-occurrence network

| Node_Index | Label                | Degree | Cluster_Coeff | Closeness | Betweenness | Eigen_Vector | PageRank | HubScore |
|------------|----------------------|--------|---------------|-----------|-------------|--------------|----------|----------|
| 1          | Abiotrophia          | 12     | 0.424         | 0.116     | 0.674       | 0.130        | 0.028    | 0.130    |
| 2          | Anaerococcus         | 8      | 0.714         | 0.113     | 0.049       | 0.079        | 0.019    | 0.079    |
| 3          | Anaerofustis         | 10     | 0.422         | 0.114     | 0.238       | 0.118        | 0.022    | 0.118    |
| 4          | Anaerostipes         | 11     | 0.545         | 0.115     | 0.426       | 0.135        | 0.025    | 0.135    |
| 5          | Anaerotruncus        | 2      | 1.000         | 0.105     | 0.000       | 0.028        | 0.007    | 0.028    |
| 6          | Atopobium            | 16     | 0.417         | 0.115     | 0.671       | 0.205        | 0.033    | 0.205    |
| 7          | Bacteroides          | 1      | 0.000         | 0.022     | 0.000       | 1.82E-18     | 0.022    | 4.00E-18 |
| 8          | Bilophila            | 1      | 0.000         | 0.105     | 0.000       | 0.017        | 0.005    | 0.017    |
| 9          | Blautia              | 3      | 1.000         | 0.105     | 0.000       | 0.020        | 0.010    | 0.020    |
| 10         | Bulleidia            | 3      | 1.000         | 0.111     | 0.000       | 0.047        | 0.009    | 0.047    |
| 11         | Butyrivibrio         | 6      | 0.467         | 0.109     | 0.547       | 0.049        | 0.020    | 0.049    |
| 12         | Capnocytophaga       | 2      | 1.000         | 0.024     | 0.000       | 0.000        | 0.018    | 7.99E-18 |
| 13         | Catenibacterium      | 15     | 0.438         | 0.117     | 1.000       | 0.183        | 0.035    | 0.183    |
| 14         | Clostridium          | 6      | 0.733         | 0.111     | 0.082       | 0.054        | 0.016    | 0.054    |
| 15         | Collinsella          | 17     | 0.610         | 0.117     | 0.405       | 0.275        | 0.034    | 0.275    |
| 16         | Coprobacillus        | 1      | 0.000         | 0.106     | 0.000       | 0.014        | 0.005    | 0.014    |
| 17         | Coprococcus          | 15     | 0.505         | 0.117     | 0.512       | 0.199        | 0.032    | 0.199    |
| 18         | Dorea                | 11     | 0.564         | 0.115     | 0.270       | 0.118        | 0.025    | 0.118    |
| 19         | Dysgonomonas         | 1      | 0.000         | 0.024     | 0.000       | 3.43E-18     | 0.011    | 5.71E-18 |
| 20         | Eggerthella          | 11     | 0.891         | 0.114     | 0.023       | 0.198        | 0.022    | 0.198    |
| 21         | Eubacterium          | 2      | 1.000         | 0.106     | 0.000       | 0.014        | 0.008    | 0.014    |
| 22         | Faecalibacterium     | 2      | 0.000         | 0.107     | 0.001       | 0.031        | 0.007    | 0.031    |
| 23         | Fingoldia            | 6      | 0.933         | 0.110     | 0.006       | 0.053        | 0.015    | 0.053    |
| 24         | Heliobacterium       | 14     | 0.670         | 0.115     | 0.554       | 0.223        | 0.030    | 0.223    |
| 25         | Holdemania           | 13     | 0.641         | 0.114     | 0.492       | 0.205        | 0.028    | 0.205    |
| 26         | Mitsuokella          | 7      | 1.000         | 0.110     | 0.000       | 0.135        | 0.015    | 0.135    |
| 27         | Oribacterium         | 16     | 0.517         | 0.117     | 0.488       | 0.238        | 0.033    | 0.238    |
| 28         | Parabacteroides      | 1      | 0.000         | 0.022     | 0.000       | 1.02E-18     | 0.022    | 4.00E-18 |
| 29         | Paraprevotella       | 3      | 0.667         | 0.024     | 0.013       | 0.000        | 0.026    | 1.37E-17 |
| 30         | Peptoniphilus        | 11     | 0.509         | 0.114     | 0.329       | 0.106        | 0.025    | 0.106    |
| 31         | Peptostreptococcus   | 6      | 0.600         | 0.113     | 0.016       | 0.101        | 0.014    | 0.101    |
| 32         | Porphyromonas        | 3      | 0.333         | 0.024     | 0.040       | 3.63E-18     | 0.027    | 1.37E-17 |
| 33         | Prevotella           | 3      | 0.667         | 0.024     | 0.013       | 0.000        | 0.026    | 1.37E-17 |
| 34         | Pseudoflavonifractor | 10     | 0.778         | 0.113     | 0.186       | 0.166        | 0.022    | 0.166    |
| 35         | Pseudoramibacter     | 20     | 0.479         | 0.118     | 0.842       | 0.294        | 0.040    | 0.294    |
| 36         | Pyramidobacter       | 17     | 0.603         | 0.117     | 0.340       | 0.273        | 0.034    | 0.273    |
| 37         | Roseburia            | 1      | 0.000         | 0.100     | 0.000       | 0.004        | 0.006    | 0.004    |
| 38         | Ruminococcus         | 7      | 0.714         | 0.110     | 0.081       | 0.072        | 0.018    | 0.072    |
| 39         | Selenomonas          | 13     | 0.756         | 0.115     | 0.082       | 0.226        | 0.026    | 0.226    |
| 40         | Shuttleworthia       | 16     | 0.517         | 0.117     | 0.554       | 0.251        | 0.032    | 0.251    |
| 41         | Slackia              | 16     | 0.625         | 0.116     | 0.284       | 0.257        | 0.032    | 0.257    |
| 42         | Solobacterium        | 16     | 0.325         | 0.116     | 0.795       | 0.181        | 0.034    | 0.181    |
| 43         | Streptobacillus      | 6      | 0.667         | 0.110     | 0.022       | 0.058        | 0.015    | 0.058    |
| 44         | Subdoligranulum      | 13     | 0.462         | 0.115     | 0.581       | 0.194        | 0.028    | 0.194    |
| 45         | Symbiobacterium      | 13     | 0.744         | 0.115     | 0.090       | 0.220        | 0.026    | 0.220    |
| 46         | Turicibacter         | 7      | 0.857         | 0.111     | 0.013       | 0.061        | 0.017    | 0.061    |

Mutual exclusion network

| Node_Index | Label | Degree | Cluster_Coeff | Closeness | Betweenness | Eigen_Vector | PageRank | HubScore |
|------------|-------|--------|---------------|-----------|-------------|--------------|----------|----------|
|------------|-------|--------|---------------|-----------|-------------|--------------|----------|----------|

America + China

|    |                  |    |       |       |       |       |       |       |
|----|------------------|----|-------|-------|-------|-------|-------|-------|
| 1  | Abiotrophia      | 1  | 0.000 | 0.471 | 0.000 | 0.154 | 0.021 | 0.062 |
| 2  | Alistipes        | 1  | 0.000 | 0.353 | 0.000 | 0.042 | 0.022 | 0.057 |
| 3  | Anaerococcus     | 1  | 0.000 | 0.471 | 0.000 | 0.154 | 0.021 | 0.062 |
| 4  | Anaerofustis     | 1  | 0.000 | 0.471 | 0.000 | 0.154 | 0.021 | 0.062 |
| 5  | Anaerostipes     | 2  | 0.000 | 0.490 | 0.038 | 0.171 | 0.037 | 0.069 |
| 6  | Bacteroides      | 20 | 0.000 | 0.857 | 1.000 | 0.696 | 0.357 | 0.944 |
| 7  | Butyrivibrio     | 1  | 0.000 | 0.471 | 0.000 | 0.154 | 0.021 | 0.062 |
| 8  | Catenibacterium  | 1  | 0.000 | 0.471 | 0.000 | 0.154 | 0.021 | 0.062 |
| 9  | Clostridium      | 2  | 0.000 | 0.490 | 0.042 | 0.170 | 0.037 | 0.068 |
| 10 | Collinsella      | 1  | 0.000 | 0.471 | 0.000 | 0.154 | 0.021 | 0.062 |
| 11 | Coprococcus      | 2  | 0.000 | 0.490 | 0.042 | 0.170 | 0.037 | 0.068 |
| 12 | Dorea            | 1  | 0.000 | 0.471 | 0.000 | 0.154 | 0.021 | 0.062 |
| 13 | Dysgonomonas     | 1  | 0.000 | 0.353 | 0.000 | 0.042 | 0.022 | 0.057 |
| 14 | Mitsuokella      | 1  | 0.000 | 0.471 | 0.000 | 0.154 | 0.021 | 0.062 |
| 15 | Oribacterium     | 1  | 0.000 | 0.471 | 0.000 | 0.154 | 0.021 | 0.062 |
| 16 | Parabacteroides  | 2  | 0.000 | 0.343 | 0.002 | 0.075 | 0.038 | 0.102 |
| 17 | Paraprevotella   | 2  | 0.000 | 0.364 | 0.006 | 0.079 | 0.038 | 0.108 |
| 18 | Peptoniphilus    | 1  | 0.000 | 0.471 | 0.000 | 0.154 | 0.021 | 0.062 |
| 19 | Pseudoramibacter | 1  | 0.000 | 0.471 | 0.000 | 0.154 | 0.021 | 0.062 |
| 20 | Pyramidobacter   | 1  | 0.000 | 0.471 | 0.000 | 0.154 | 0.021 | 0.062 |
| 21 | Ruminococcus     | 4  | 0.000 | 0.533 | 0.208 | 0.189 | 0.074 | 0.076 |
| 22 | Selenomonas      | 1  | 0.000 | 0.471 | 0.000 | 0.154 | 0.021 | 0.062 |
| 23 | Shuttleworthia   | 1  | 0.000 | 0.471 | 0.000 | 0.154 | 0.021 | 0.062 |
| 24 | Solobacterium    | 1  | 0.000 | 0.471 | 0.000 | 0.154 | 0.021 | 0.062 |
| 25 | Subdoligranulum  | 1  | 0.000 | 0.471 | 0.000 | 0.154 | 0.021 | 0.062 |

America + Denmark

Co-occurrence network

| Node_Index | Label                | Degree | Cluster_Coeff | Closeness | Betweenness | Eigen_Vector | PageRank | HubScore |
|------------|----------------------|--------|---------------|-----------|-------------|--------------|----------|----------|
| 1          | Abiotrophia          | 1      | 0.000         | 0.146     | 0.000       | 0.014        | 0.005    | 0.014    |
| 2          | Acetivibrio          | 14     | 0.945         | 0.167     | 0.003       | 0.206        | 0.024    | 0.206    |
| 3          | Acholeplasma         | 19     | 0.637         | 0.177     | 0.305       | 0.247        | 0.033    | 0.247    |
| 4          | Aerococcus           | 6      | 0.733         | 0.161     | 0.004       | 0.086        | 0.012    | 0.086    |
| 5          | Alicyclobacillus     | 16     | 0.583         | 0.177     | 0.367       | 0.172        | 0.029    | 0.172    |
| 6          | Alkaliphilus         | 19     | 0.632         | 0.180     | 0.470       | 0.256        | 0.032    | 0.256    |
| 7          | Anaerococcus         | 15     | 0.819         | 0.168     | 0.303       | 0.207        | 0.028    | 0.207    |
| 8          | Anaerofustis         | 14     | 0.703         | 0.177     | 0.254       | 0.196        | 0.025    | 0.196    |
| 9          | Anaerotruncus        | 1      | 0.000         | 0.144     | 0.000       | 0.005        | 0.005    | 0.005    |
| 10         | Atopobium            | 1      | 0.000         | 0.146     | 0.000       | 0.014        | 0.005    | 0.014    |
| 11         | Bifidobacterium      | 2      | 1.000         | 0.145     | 0.000       | 0.007        | 0.007    | 0.007    |
| 12         | Caldicellulosiruptor | 17     | 0.743         | 0.178     | 0.180       | 0.238        | 0.029    | 0.238    |
| 13         | Capnocytophaga       | 2      | 1.000         | 0.024     | 0.000       | 6.68E-18     | 0.022    | 0.000    |
| 14         | Collinsella          | 6      | 0.733         | 0.152     | 0.042       | 0.037        | 0.015    | 0.037    |
| 15         | Dehalococcoides      | 1      | 0.000         | 0.154     | 0.000       | 0.010        | 0.005    | 0.010    |
| 16         | Desulfitobacterium   | 7      | 1.000         | 0.164     | 0.000       | 0.067        | 0.015    | 0.067    |
| 17         | Eggerthella          | 13     | 0.808         | 0.169     | 0.079       | 0.108        | 0.025    | 0.108    |
| 18         | Fibrobacter          | 3      | 0.667         | 0.158     | 0.001       | 0.038        | 0.008    | 0.038    |
| 19         | Finegoldia           | 15     | 0.857         | 0.168     | 0.020       | 0.214        | 0.026    | 0.214    |
| 20         | Fusobacterium        | 14     | 0.879         | 0.167     | 0.018       | 0.199        | 0.025    | 0.199    |
| 21         | Gemella              | 14     | 0.901         | 0.174     | 0.050       | 0.209        | 0.024    | 0.209    |
| 22         | Heliobacterium       | 17     | 0.574         | 0.179     | 0.584       | 0.145        | 0.034    | 0.145    |
| 23         | Holdemania           | 4      | 1.000         | 0.161     | 0.000       | 0.041        | 0.010    | 0.041    |
| 24         | Jonquetella          | 10     | 0.756         | 0.173     | 0.150       | 0.096        | 0.020    | 0.096    |
| 25         | Mesoplasma           | 19     | 0.632         | 0.180     | 0.350       | 0.251        | 0.033    | 0.251    |
| 26         | Mitsuokella          | 9      | 1.000         | 0.165     | 0.000       | 0.085        | 0.018    | 0.085    |
| 27         | Paraprevotella       | 2      | 1.000         | 0.024     | 0.000       | 4.74E-20     | 0.022    | 0.000    |
| 28         | Parascardovia        | 12     | 0.909         | 0.167     | 0.006       | 0.107        | 0.023    | 0.107    |
| 29         | Peptoniphilus        | 15     | 0.819         | 0.168     | 0.303       | 0.207        | 0.028    | 0.207    |
| 30         | Peptostreptococcus   | 2      | 1.000         | 0.154     | 0.000       | 0.033        | 0.006    | 0.033    |
| 31         | Porphyromonas        | 1      | 0.000         | 0.024     | 0.000       | 1.13E-18     | 0.013    | 0.000    |
| 32         | Prevotella           | 3      | 0.333         | 0.024     | 0.015       | 2.17E-17     | 0.033    | 0.000    |
| 33         | Pseudoflavonifractor | 11     | 0.582         | 0.165     | 0.564       | 0.070        | 0.026    | 0.070    |
| 34         | Pseudoramibacter     | 15     | 0.733         | 0.171     | 0.104       | 0.118        | 0.029    | 0.118    |
| 35         | Pyramidobacter       | 16     | 0.667         | 0.171     | 0.149       | 0.121        | 0.031    | 0.121    |
| 36         | Selenomonas          | 23     | 0.435         | 0.183     | 1.000       | 0.237        | 0.040    | 0.237    |
| 37         | Shuttleworthia       | 12     | 0.818         | 0.167     | 0.022       | 0.103        | 0.023    | 0.103    |
| 38         | Slackia              | 15     | 0.733         | 0.171     | 0.104       | 0.118        | 0.029    | 0.118    |
| 39         | Solobacterium        | 13     | 0.795         | 0.175     | 0.134       | 0.192        | 0.023    | 0.192    |
| 40         | Streptobacillus      | 13     | 0.897         | 0.167     | 0.013       | 0.189        | 0.023    | 0.189    |
| 41         | Symbiobacterium      | 15     | 0.676         | 0.177     | 0.271       | 0.140        | 0.028    | 0.140    |
| 42         | Thermanaerovibrio    | 17     | 0.559         | 0.179     | 0.423       | 0.152        | 0.031    | 0.152    |
| 43         | Thermoanaerobacter   | 16     | 0.750         | 0.174     | 0.177       | 0.218        | 0.028    | 0.218    |
| 44         | Treponema            | 10     | 0.467         | 0.172     | 0.161       | 0.123        | 0.019    | 0.123    |
| 45         | Turicibacter         | 18     | 0.667         | 0.177     | 0.278       | 0.239        | 0.032    | 0.239    |

Mutual exclusion network

| Node_Index | Label        | Degree | Cluster_Coeff | Closeness | Betweenness | Eigen_Vector | PageRank | HubScore |
|------------|--------------|--------|---------------|-----------|-------------|--------------|----------|----------|
| 1          | Acholeplasma | 1      | 0.000         | 0.131     | 0.000       | 0.204        | 0.030    | 0.288    |

America + Denmark

|    |                       |    |       |       |       |          |       |       |
|----|-----------------------|----|-------|-------|-------|----------|-------|-------|
| 2  | Alistipes             | 1  | 0.000 | 0.056 | 0.000 | 3.41E-17 | 0.053 | 0.000 |
| 3  | Anaerococcus          | 1  | 0.000 | 0.131 | 0.000 | 0.204    | 0.030 | 0.288 |
| 4  | Anaerofustis          | 1  | 0.000 | 0.131 | 0.000 | 0.204    | 0.030 | 0.288 |
| 5  | Anaerostipes          | 1  | 0.000 | 0.056 | 0.000 | 9.22E-18 | 0.053 | 0.000 |
| 6  | Bacteroides           | 12 | 0.000 | 0.143 | 1.000 | 0.707    | 0.319 | 0.084 |
| 7  | Butyrivibrio          | 1  | 0.000 | 0.131 | 0.000 | 0.204    | 0.030 | 0.288 |
| 8  | Dialister             | 1  | 0.000 | 0.056 | 0.000 | 1.16E-17 | 0.053 | 0.000 |
| 9  | Finegoldia            | 1  | 0.000 | 0.131 | 0.000 | 0.204    | 0.030 | 0.288 |
| 10 | Gemella               | 1  | 0.000 | 0.131 | 0.000 | 0.204    | 0.030 | 0.288 |
| 11 | Heliobacterium        | 1  | 0.000 | 0.131 | 0.000 | 0.204    | 0.030 | 0.288 |
| 12 | Mesoplasma            | 1  | 0.000 | 0.131 | 0.000 | 0.204    | 0.030 | 0.288 |
| 13 | Oribacterium          | 1  | 0.000 | 0.131 | 0.000 | 0.204    | 0.030 | 0.288 |
| 14 | Phascolarctobacterium | 1  | 0.000 | 0.056 | 0.000 | 8.78E-18 | 0.053 | 0.000 |
| 15 | Prevotella            | 1  | 0.000 | 0.056 | 0.000 | 1.75E-17 | 0.053 | 0.000 |
| 16 | Pseudoramibacter      | 1  | 0.000 | 0.131 | 0.000 | 0.204    | 0.030 | 0.288 |
| 17 | Selenomonas           | 1  | 0.000 | 0.131 | 0.000 | 0.204    | 0.030 | 0.288 |
| 18 | Subdoligranulum       | 1  | 0.000 | 0.056 | 0.000 | 0.000    | 0.053 | 0.000 |
| 19 | Thermoanaerobacter    | 1  | 0.000 | 0.131 | 0.000 | 0.204    | 0.030 | 0.288 |

America + Denmark + Spain

**Co-occurrence network**

| Node_Index | Label                | Degree | Cluster_Coeff | Closeness | Betweenness | Eigen_Vector | PageRank | HubScore |
|------------|----------------------|--------|---------------|-----------|-------------|--------------|----------|----------|
| 1          | Acetivibrio          | 1      | 0.000         | 0.046     | 0.000       | 6.60E-17     | 0.009    | 4.71E-17 |
| 2          | Acholeplasma         | 3      | 1.000         | 0.047     | 0.000       | 2.16E-16     | 0.018    | 8.92E-17 |
| 3          | Aerococcus           | 1      | 0.000         | 0.047     | 0.000       | 7.55E-17     | 0.009    | 6.48E-17 |
| 4          | Alicyclobacillus     | 4      | 1.000         | 0.051     | 0.000       | 0.209        | 0.024    | 0.209    |
| 5          | Alkaliphilus         | 5      | 0.800         | 0.047     | 0.027       | 2.96E-16     | 0.027    | 2.17E-16 |
| 6          | Anaerococcus         | 8      | 0.643         | 0.047     | 0.181       | 6.18E-16     | 0.041    | 2.35E-16 |
| 7          | Bifidobacterium      | 1      | 0.000         | 0.050     | 0.000       | 0.008        | 0.013    | 0.008    |
| 8          | Caldicellulosiruptor | 7      | 0.810         | 0.047     | 0.036       | 4.16E-16     | 0.035    | 2.78E-16 |
| 9          | Capnocytophaga       | 2      | 1.000         | 0.032     | 0.000       | 0.000        | 0.029    | 1.16E-17 |
| 10         | Collinsella          | 2      | 0.000         | 0.051     | 0.438       | 0.053        | 0.021    | 0.053    |
| 11         | Desulfitobacterium   | 2      | 1.000         | 0.051     | 0.000       | 0.106        | 0.014    | 0.106    |
| 12         | Eggerthella          | 6      | 1.000         | 0.052     | 0.000       | 0.312        | 0.034    | 0.312    |
| 13         | Fingoldia            | 7      | 0.667         | 0.047     | 0.380       | 4.03E-16     | 0.038    | 2.78E-16 |
| 14         | Fusobacterium        | 8      | 0.571         | 0.047     | 0.359       | 4.74E-16     | 0.041    | 2.35E-16 |
| 15         | Gemella              | 5      | 0.500         | 0.047     | 0.083       | 3.43E-16     | 0.028    | 1.22E-16 |
| 16         | Heliobacterium       | 8      | 0.679         | 0.052     | 0.227       | 0.352        | 0.045    | 0.352    |
| 17         | Holdemania           | 1      | 0.000         | 0.051     | 0.000       | 0.052        | 0.009    | 0.052    |
| 18         | Jonquetella          | 1      | 0.000         | 0.051     | 0.000       | 0.056        | 0.009    | 0.056    |
| 19         | Mesoplasma           | 4      | 0.833         | 0.047     | 0.014       | 2.81E-16     | 0.023    | 1.41E-16 |
| 20         | Mitsuokella          | 2      | 1.000         | 0.051     | 0.000       | 0.103        | 0.014    | 0.103    |
| 21         | Paraprevotella       | 2      | 1.000         | 0.032     | 0.000       | 0.000        | 0.029    | 1.16E-17 |
| 22         | Peptoniphilus        | 2      | 1.000         | 0.047     | 0.000       | 1.24E-16     | 0.014    | 7.06E-17 |
| 23         | Porphyromonas        | 1      | 0.000         | 0.032     | 0.000       | 0.000        | 0.017    | 5.78E-18 |
| 24         | Prevotella           | 3      | 0.333         | 0.032     | 0.063       | 0.000        | 0.043    | 1.84E-17 |
| 25         | Pseudoflavonifractor | 1      | 0.000         | 0.051     | 0.000       | 0.050        | 0.009    | 0.050    |
| 26         | Pseudoramibacter     | 8      | 0.750         | 0.052     | 0.102       | 0.365        | 0.044    | 0.365    |
| 27         | Pyramidobacter       | 10     | 0.489         | 0.052     | 0.742       | 0.385        | 0.058    | 0.385    |
| 28         | Selenomonas          | 9      | 0.528         | 0.052     | 0.625       | 0.358        | 0.053    | 0.358    |
| 29         | Shuttleworthia       | 4      | 1.000         | 0.052     | 0.000       | 0.212        | 0.024    | 0.212    |
| 30         | Slackia              | 9      | 0.528         | 0.052     | 1.000       | 0.358        | 0.053    | 0.358    |
| 31         | Streptobacillus      | 6      | 0.733         | 0.047     | 0.063       | 4.58E-16     | 0.031    | 2.26E-16 |
| 32         | Symbiobacterium      | 8      | 0.643         | 0.052     | 0.492       | 0.345        | 0.046    | 0.345    |
| 33         | Thermoanaerobacter   | 10     | 0.467         | 0.047     | 0.638       | 6.13E-16     | 0.053    | 2.45E-16 |
| 34         | Turicibacter         | 9      | 0.611         | 0.047     | 0.217       | 4.83E-16     | 0.045    | 2.68E-16 |

**Mutual exclusion network**

| Node_Index | Label                 | Degree | Cluster_Coeff | Closeness | Betweenness | Eigen_Vector | PageRank | HubScore |
|------------|-----------------------|--------|---------------|-----------|-------------|--------------|----------|----------|
| 1          | Anaerococcus          | 1      | 0.000         | 0.286     | 0.000       | 0.354        | 0.094    | 0.224    |
| 2          | Bacteroides           | 4      | 0.000         | 0.333     | 1.000       | 0.707        | 0.340    | 0.894    |
| 3          | Dialister             | 1      | 0.000         | 0.167     | 0.000       | 2.58E-17     | 0.143    | 0.000    |
| 4          | Fingoldia             | 1      | 0.000         | 0.286     | 0.000       | 0.354        | 0.094    | 0.224    |
| 5          | Phascolarctobacterium | 1      | 0.000         | 0.167     | 0.000       | 9.30E-18     | 0.143    | 0.000    |
| 6          | Selenomonas           | 1      | 0.000         | 0.286     | 0.000       | 0.354        | 0.094    | 0.224    |
| 7          | Thermoanaerobacter    | 1      | 0.000         | 0.286     | 0.000       | 0.354        | 0.094    | 0.224    |

China + Denmark

Co-occurrence network

| Node_Index | Label                | Degree | Cluster_Coeff | Closeness | Betweenness | Eigen_Vector | PageRank | HubScore |
|------------|----------------------|--------|---------------|-----------|-------------|--------------|----------|----------|
| 1          | Alistipes            | 3      | 0.000         | 0.115     | 0.813       | 0.016        | 0.035    | 0.016    |
| 2          | Anaerococcus         | 6      | 0.800         | 0.117     | 0.026       | 0.022        | 0.034    | 0.022    |
| 3          | Anaerofustis         | 4      | 1.000         | 0.115     | 0.000       | 0.012        | 0.024    | 0.012    |
| 4          | Anaerotruncus        | 5      | 0.600         | 0.123     | 1.000       | 0.143        | 0.029    | 0.143    |
| 5          | Atopobium            | 1      | 0.000         | 0.114     | 0.000       | 0.006        | 0.010    | 0.006    |
| 6          | Bilophila            | 2      | 0.000         | 0.106     | 0.288       | 0.002        | 0.029    | 0.002    |
| 7          | Capnocytophaga       | 2      | 1.000         | 0.036     | 0.000       | 0.000        | 0.032    | 1.81E-18 |
| 8          | Collinsella          | 5      | 1.000         | 0.120     | 0.000       | 0.175        | 0.022    | 0.175    |
| 9          | Dorea                | 1      | 0.000         | 0.033     | 0.000       | 7.80E-19     | 0.032    | 9.05E-19 |
| 10         | Dysgonomonas         | 1      | 0.000         | 0.106     | 0.000       | 0.002        | 0.015    | 0.002    |
| 11         | Eggerthella          | 10     | 0.778         | 0.128     | 0.249       | 0.309        | 0.041    | 0.309    |
| 12         | Eubacterium          | 1      | 0.000         | 0.033     | 0.000       | 0.000        | 0.032    | 9.05E-19 |
| 13         | Fingoldia            | 5      | 0.900         | 0.117     | 0.010       | 0.021        | 0.029    | 0.021    |
| 14         | Heliobacterium       | 9      | 0.917         | 0.126     | 0.011       | 0.298        | 0.036    | 0.298    |
| 15         | Holdemania           | 3      | 1.000         | 0.122     | 0.000       | 0.104        | 0.015    | 0.104    |
| 16         | Mitsuokella          | 6      | 1.000         | 0.122     | 0.000       | 0.208        | 0.026    | 0.208    |
| 17         | Parabacteroides      | 1      | 0.000         | 0.098     | 0.000       | 0.000        | 0.017    | 0.000    |
| 18         | Paraprevotella       | 2      | 1.000         | 0.036     | 0.000       | 0.000        | 0.032    | 1.81E-18 |
| 19         | Peptoniphilus        | 8      | 0.429         | 0.124     | 0.896       | 0.051        | 0.046    | 0.051    |
| 20         | Porphyromonas        | 1      | 0.000         | 0.036     | 0.000       | 0.000        | 0.018    | 4.24E-18 |
| 21         | Prevotella           | 3      | 0.333         | 0.036     | 0.025       | 0.000        | 0.047    | 0.000    |
| 22         | Pseudoflavonifractor | 10     | 0.778         | 0.128     | 0.249       | 0.309        | 0.041    | 0.309    |
| 23         | Pseudoramibacter     | 10     | 0.822         | 0.126     | 0.045       | 0.316        | 0.040    | 0.316    |
| 24         | Pyramidobacter       | 12     | 0.636         | 0.129     | 0.402       | 0.340        | 0.049    | 0.340    |
| 25         | Selenomonas          | 11     | 0.655         | 0.128     | 0.338       | 0.316        | 0.045    | 0.316    |
| 26         | Shuttleworthia       | 10     | 0.667         | 0.129     | 0.910       | 0.293        | 0.042    | 0.293    |
| 27         | Slackia              | 11     | 0.727         | 0.129     | 0.295       | 0.330        | 0.045    | 0.330    |
| 28         | Solobacterium        | 6      | 0.467         | 0.124     | 0.515       | 0.081        | 0.031    | 0.081    |
| 29         | Streptobacillus      | 5      | 0.900         | 0.115     | 0.003       | 0.014        | 0.029    | 0.014    |
| 30         | Symbiobacterium      | 10     | 0.756         | 0.128     | 0.275       | 0.306        | 0.041    | 0.306    |
| 31         | Turicibacter         | 6      | 0.800         | 0.117     | 0.026       | 0.022        | 0.034    | 0.022    |

Mutual exclusion network

| Node_Index | Label            | Degree | Cluster_Coeff | Closeness | Betweenness | Eigen_Vector | PageRank | HubScore |
|------------|------------------|--------|---------------|-----------|-------------|--------------|----------|----------|
| 1          | Anaerococcus     | 1      | 0.000         | 0.276     | 0.000       | 0.289        | 0.069    | 0.135    |
| 2          | Anaerofustis     | 1      | 0.000         | 0.276     | 0.000       | 0.289        | 0.069    | 0.135    |
| 3          | Bacteroides      | 6      | 0.000         | 0.333     | 1.000       | 0.707        | 0.366    | 0.944    |
| 4          | Butyrivibrio     | 1      | 0.000         | 0.276     | 0.000       | 0.289        | 0.069    | 0.135    |
| 5          | Faecalibacterium | 1      | 0.000         | 0.125     | 0.000       | 3.67E-17     | 0.111    | 0.000    |
| 6          | Fusobacterium    | 1      | 0.000         | 0.125     | 0.000       | 6.79E-17     | 0.111    | 0.000    |
| 7          | Oribacterium     | 1      | 0.000         | 0.276     | 0.000       | 0.289        | 0.069    | 0.135    |
| 8          | Pseudoramibacter | 1      | 0.000         | 0.276     | 0.000       | 0.289        | 0.069    | 0.135    |
| 9          | Selenomonas      | 1      | 0.000         | 0.276     | 0.000       | 0.289        | 0.069    | 0.135    |

China + Japan

Co-occurrence network

| Node_Index | Label                | Degree | Cluster_Coeff | Closeness | Betweenness | Eigen_Vector | PageRank | HubScore |
|------------|----------------------|--------|---------------|-----------|-------------|--------------|----------|----------|
| 1          | Abiotrophia          | 2      | 0.000         | 0.062     | 0.281       | 0.001        | 0.020    | 0.001    |
| 2          | Alistipes            | 9      | 0.444         | 0.067     | 0.417       | 0.253        | 0.035    | 0.253    |
| 3          | Anaerofustis         | 1      | 0.000         | 0.059     | 0.000       | 0.000        | 0.012    | 0.000    |
| 4          | Anaerostipes         | 1      | 0.000         | 0.026     | 0.000       | 0.000        | 0.019    | 0.000    |
| 5          | Anaerotruncus        | 10     | 0.622         | 0.067     | 0.058       | 0.331        | 0.036    | 0.331    |
| 6          | Bacteroides          | 2      | 0.000         | 0.026     | 0.011       | 0.000        | 0.036    | 0.000    |
| 7          | Bilophila            | 1      | 0.000         | 0.026     | 0.000       | 0.000        | 0.019    | 0.000    |
| 8          | Blautia              | 1      | 0.000         | 0.025     | 0.000       | 0.000        | 0.024    | 0.000    |
| 9          | Bulleidia            | 5      | 0.400         | 0.067     | 1.000       | 0.141        | 0.023    | 0.141    |
| 10         | Butyrivibrio         | 2      | 0.000         | 0.062     | 0.540       | 0.002        | 0.021    | 0.002    |
| 11         | Capnocytophaga       | 2      | 1.000         | 0.026     | 0.000       | 0.000        | 0.024    | 0.000    |
| 12         | Catenibacterium      | 1      | 0.000         | 0.062     | 0.000       | 0.003        | 0.011    | 0.003    |
| 13         | Clostridium          | 2      | 0.000         | 0.026     | 0.011       | 0.000        | 0.036    | 0.000    |
| 14         | Collinsella          | 6      | 0.867         | 0.066     | 0.006       | 0.224        | 0.022    | 0.224    |
| 15         | Coprobacillus        | 1      | 0.000         | 0.025     | 0.000       | 0.000        | 0.024    | 0.000    |
| 16         | Coprococcus          | 3      | 0.333         | 0.065     | 0.199       | 0.027        | 0.018    | 0.027    |
| 17         | Dorea                | 1      | 0.000         | 0.058     | 0.000       | 3.17E-05     | 0.014    | 3.17E-05 |
| 18         | Dysgonomonas         | 3      | 0.667         | 0.065     | 0.015       | 0.072        | 0.015    | 0.072    |
| 19         | Eubacterium          | 2      | 0.000         | 0.060     | 0.281       | 0.000        | 0.025    | 0.000    |
| 20         | Faecalibacterium     | 4      | 0.167         | 0.066     | 0.598       | 0.059        | 0.022    | 0.059    |
| 21         | Heliobacterium       | 11     | 0.600         | 0.067     | 0.104       | 0.356        | 0.039    | 0.356    |
| 22         | Holdemania           | 8      | 0.500         | 0.067     | 0.426       | 0.242        | 0.031    | 0.242    |
| 23         | Megasphaera          | 1      | 0.000         | 0.025     | 0.000       | 0.000        | 0.024    | 0.000    |
| 24         | Mitsuokella          | 1      | 0.000         | 0.025     | 0.000       | 0.000        | 0.024    | 0.000    |
| 25         | Oribacterium         | 6      | 0.333         | 0.067     | 0.379       | 0.150        | 0.025    | 0.150    |
| 26         | Parabacteroides      | 1      | 0.000         | 0.026     | 0.000       | 0.000        | 0.019    | 0.000    |
| 27         | Paraprevotella       | 2      | 1.000         | 0.026     | 0.000       | 0.000        | 0.024    | 0.000    |
| 28         | Peptostreptococcus   | 2      | 0.000         | 0.064     | 0.778       | 0.017        | 0.017    | 0.017    |
| 29         | Porphyromonas        | 2      | 1.000         | 0.064     | 0.000       | 0.039        | 0.011    | 0.039    |
| 30         | Prevotella           | 2      | 1.000         | 0.026     | 0.000       | 0.000        | 0.024    | 0.000    |
| 31         | Pseudoflavonifractor | 10     | 0.533         | 0.067     | 0.217       | 0.301        | 0.037    | 0.301    |
| 32         | Pseudoramibacter     | 7      | 0.524         | 0.067     | 0.266       | 0.215        | 0.027    | 0.215    |
| 33         | Pyramidobacter       | 11     | 0.527         | 0.068     | 0.462       | 0.337        | 0.040    | 0.337    |
| 34         | Roseburia            | 3      | 0.333         | 0.064     | 0.540       | 0.011        | 0.022    | 0.011    |
| 35         | Ruminococcus         | 1      | 0.000         | 0.026     | 0.000       | 0.000        | 0.019    | 0.000    |
| 36         | Selenomonas          | 8      | 0.500         | 0.067     | 0.585       | 0.229        | 0.033    | 0.229    |
| 37         | Shuttleworthia       | 10     | 0.556         | 0.068     | 0.360       | 0.313        | 0.037    | 0.313    |
| 38         | Slackia              | 3      | 1.000         | 0.065     | 0.000       | 0.111        | 0.013    | 0.111    |
| 39         | Solobacterium        | 2      | 0.000         | 0.065     | 0.281       | 0.028        | 0.016    | 0.028    |
| 40         | Subdoligranulum      | 7      | 0.429         | 0.067     | 0.423       | 0.210        | 0.027    | 0.210    |
| 41         | Symbiobacterium      | 9      | 0.583         | 0.067     | 0.267       | 0.281        | 0.033    | 0.281    |

Mutual exclusion network

No common nodes in mutual exclusion network



China + Japan + India

**Co-occurrence network**

| Node_Index | Label                | Degree | Cluster_Coeff | Closeness | Betweenness | Eigen_Vector | PageRank | HubScore |
|------------|----------------------|--------|---------------|-----------|-------------|--------------|----------|----------|
| 1          | Alistipes            | 2      | 0.000         | 0.106     | 0.019       | 0.157        | 0.035    | 0.157    |
| 2          | Anaerotruncus        | 3      | 0.333         | 0.114     | 0.278       | 0.329        | 0.047    | 0.329    |
| 3          | Bacteroides          | 1      | 0.000         | 0.048     | 0.000       | 1.49E-17     | 0.045    | 4.04E-18 |
| 4          | Butyrivibrio         | 1      | 0.000         | 0.050     | 0.000       | 1.70E-18     | 0.035    | 0.000    |
| 5          | Clostridium          | 1      | 0.000         | 0.048     | 0.000       | 7.81E-18     | 0.045    | 4.04E-18 |
| 6          | Coprococcus          | 1      | 0.000         | 0.100     | 0.000       | 0.018        | 0.025    | 0.018    |
| 7          | Dorea                | 1      | 0.000         | 0.050     | 0.000       | 1.68E-17     | 0.035    | 0.000    |
| 8          | Dysgonomonas         | 2      | 0.000         | 0.110     | 0.092       | 0.203        | 0.035    | 0.203    |
| 9          | Eubacterium          | 2      | 0.000         | 0.050     | 0.019       | 1.67E-17     | 0.066    | 0.000    |
| 10         | Faecalibacterium     | 3      | 0.000         | 0.112     | 0.468       | 0.190        | 0.053    | 0.190    |
| 11         | Heliobacterium       | 4      | 0.167         | 0.112     | 0.364       | 0.328        | 0.066    | 0.328    |
| 12         | Holdemania           | 4      | 0.000         | 0.112     | 0.313       | 0.223        | 0.068    | 0.223    |
| 13         | Oribacterium         | 2      | 0.000         | 0.110     | 0.013       | 0.172        | 0.035    | 0.172    |
| 14         | Parabacteroides      | 1      | 0.000         | 0.048     | 0.000       | 1.06E-17     | 0.045    | 4.04E-18 |
| 15         | Pseudoflavonifractor | 6      | 0.200         | 0.117     | 1.000       | 0.532        | 0.090    | 0.532    |
| 16         | Pseudoramibacter     | 1      | 0.000         | 0.104     | 0.000       | 0.097        | 0.021    | 0.097    |
| 17         | Pyramidobacter       | 3      | 0.667         | 0.111     | 0.025       | 0.328        | 0.048    | 0.328    |
| 18         | Roseburia            | 2      | 0.000         | 0.106     | 0.247       | 0.061        | 0.043    | 0.061    |
| 19         | Ruminococcus         | 1      | 0.000         | 0.048     | 0.000       | 1.46E-17     | 0.045    | 4.04E-18 |
| 20         | Selenomonas          | 1      | 0.000         | 0.105     | 0.000       | 0.066        | 0.021    | 0.066    |
| 21         | Slackia              | 2      | 1.000         | 0.109     | 0.000       | 0.254        | 0.033    | 0.254    |
| 22         | Subdoligranulum      | 4      | 0.167         | 0.115     | 0.598       | 0.361        | 0.063    | 0.361    |

**Mutual exclusion network**

No common nodes in mutual exclusion network

## Denmark + Spain

## Co-occurrence network

| Node_Index | Label                | Degree | Cluster_Coeff | Closeness | Betweenness | Eigen_Vector | PageRank | HubScore |
|------------|----------------------|--------|---------------|-----------|-------------|--------------|----------|----------|
| 1          | Acetivibrio          | 2      | 0.000         | 0.043     | 0.003       | 0.076        | 0.012    | 0.076    |
| 2          | Acholeplasma         | 3      | 1.000         | 0.043     | 0.000       | 0.119        | 0.016    | 0.119    |
| 3          | Aerococcus           | 1      | 0.000         | 0.043     | 0.000       | 0.051        | 0.008    | 0.051    |
| 4          | Alicyclobacillus     | 5      | 0.700         | 0.049     | 0.074       | 3.62E-16     | 0.027    | 0.000    |
| 5          | Alkaliphilus         | 6      | 0.800         | 0.043     | 0.027       | 0.254        | 0.026    | 0.254    |
| 6          | Anaerococcus         | 9      | 0.611         | 0.043     | 0.136       | 0.341        | 0.038    | 0.341    |
| 7          | Bifidobacterium      | 1      | 0.000         | 0.047     | 0.000       | 7.75E-18     | 0.012    | 1.07E-17 |
| 8          | Caldicellulosiruptor | 8      | 0.786         | 0.043     | 0.025       | 0.337        | 0.034    | 0.337    |
| 9          | Capnocytophaga       | 2      | 1.000         | 0.029     | 0.000       | 0.000        | 0.027    | 2.15E-17 |
| 10         | Collinsella          | 2      | 0.000         | 0.048     | 0.309       | 9.27E-17     | 0.019    | 0.000    |
| 11         | Desulfotobacterium   | 2      | 1.000         | 0.048     | 0.000       | 1.46E-16     | 0.013    | 0.000    |
| 12         | Eggerthella          | 6      | 1.000         | 0.049     | 0.000       | 5.12E-16     | 0.031    | 0.000    |
| 13         | Fingoldia            | 7      | 0.667         | 0.043     | 0.119       | 0.283        | 0.031    | 0.283    |
| 14         | Fusobacterium        | 9      | 0.583         | 0.043     | 0.245       | 0.336        | 0.039    | 0.336    |
| 15         | Gemella              | 5      | 0.500         | 0.043     | 0.051       | 0.174        | 0.024    | 0.174    |
| 16         | Heliobacterium       | 8      | 0.679         | 0.049     | 0.140       | 5.07E-16     | 0.041    | 0.000    |
| 17         | Holdemania           | 1      | 0.000         | 0.048     | 0.000       | 8.92E-17     | 0.009    | 0.000    |
| 18         | Jonquetella          | 2      | 0.000         | 0.049     | 0.579       | 8.45E-17     | 0.019    | 0.000    |
| 19         | Leptotrichia         | 7      | 0.667         | 0.043     | 0.120       | 0.283        | 0.031    | 0.283    |
| 20         | Magnetospirillum     | 2      | 0.000         | 0.048     | 0.309       | 4.08E-18     | 0.024    | 3.35E-17 |
| 21         | Mesoplasma           | 4      | 0.833         | 0.043     | 0.009       | 0.163        | 0.019    | 0.163    |
| 22         | Mitsuokella          | 2      | 1.000         | 0.048     | 0.000       | 1.56E-16     | 0.013    | 0.000    |
| 23         | Paraprevotella       | 2      | 1.000         | 0.029     | 0.000       | 0.000        | 0.027    | 2.15E-17 |
| 24         | Peptoniphilus        | 2      | 1.000         | 0.043     | 0.000       | 0.069        | 0.012    | 0.069    |
| 25         | Porphyromonas        | 1      | 0.000         | 0.029     | 0.000       | 0.000        | 0.015    | 4.73E-18 |
| 26         | Prevotella           | 3      | 0.333         | 0.029     | 0.039       | 0.000        | 0.040    | 3.22E-17 |
| 27         | Pseudoflavonifractor | 2      | 1.000         | 0.048     | 0.000       | 1.19E-16     | 0.013    | 0.000    |
| 28         | Pseudoramibacter     | 8      | 0.750         | 0.049     | 0.064       | 6.15E-16     | 0.040    | 0.000    |
| 29         | Pyramidobacter       | 10     | 0.489         | 0.049     | 1.000       | 6.31E-16     | 0.053    | 0.000    |
| 30         | Rhodospirillum       | 1      | 0.000         | 0.047     | 0.000       | 0.000        | 0.014    | 1.68E-17 |
| 31         | Selenomonas          | 9      | 0.528         | 0.049     | 0.442       | 5.67E-16     | 0.048    | 0.000    |
| 32         | Shuttleworthia       | 4      | 1.000         | 0.049     | 0.000       | 3.26E-16     | 0.022    | 0.000    |
| 33         | Slackia              | 9      | 0.528         | 0.049     | 0.712       | 5.43E-16     | 0.049    | 0.000    |
| 34         | Streptobacillus      | 6      | 0.733         | 0.043     | 0.035       | 0.254        | 0.026    | 0.254    |
| 35         | Symbiobacterium      | 8      | 0.679         | 0.049     | 0.249       | 5.68E-16     | 0.041    | 0.000    |
| 36         | Thermoanaerobacter   | 11     | 0.473         | 0.043     | 0.432       | 0.377        | 0.049    | 0.377    |
| 37         | Turicibacter         | 10     | 0.600         | 0.043     | 0.149       | 0.377        | 0.042    | 0.377    |

## Mutual exclusion network

| Node_Index | Label                 | Degree | Cluster_Coeff | Closeness | Betweenness | Eigen_Vector | PageRank | HubScore |
|------------|-----------------------|--------|---------------|-----------|-------------|--------------|----------|----------|
| 1          | Anaerococcus          | 1      | 0.000         | 0.286     | 0.000       | 0.354        | 0.094    | 0.224    |
| 2          | Bacteroides           | 4      | 0.000         | 0.333     | 1.000       | 0.707        | 0.340    | 0.894    |
| 3          | Dialister             | 1      | 0.000         | 0.167     | 0.000       | 2.58E-17     | 0.143    | 0.000    |
| 4          | Fingoldia             | 1      | 0.000         | 0.286     | 0.000       | 0.354        | 0.094    | 0.224    |
| 5          | Phascolarctobacterium | 1      | 0.000         | 0.167     | 0.000       | 9.30E-18     | 0.143    | 0.000    |
| 6          | Selenomonas           | 1      | 0.000         | 0.286     | 0.000       | 0.354        | 0.094    | 0.224    |
| 7          | Thermoanaerobacter    | 1      | 0.000         | 0.286     | 0.000       | 0.354        | 0.094    | 0.224    |
