# Supplementary material for: Global investigation of composition and interaction networks in gut microbiomes of individuals belonging to diverse geographies and age-groups
Source: PubMed Central journal article supplement (PMC4858888; doi:10.1186/s13099-016-0099-z), 2016-05-06
Supplement: 13099_2016_99_MOESM14_ESM.pdf [file 13099_2016_99_MOESM14_ESM.pdf]

Regression coefficients of the abundance patterns of various genera with first component (PC1) of the PLS regression analysis

| <b>Genera</b>         | <b>Regression Coefficient with PC1 components (R<sup>2</sup>)</b> |
|-----------------------|-------------------------------------------------------------------|
| Bulleidia             | 0.9115                                                            |
| Porphyromonas         | 0.8780                                                            |
| Bacteroides           | 0.8752                                                            |
| Finegoldia            | 0.8541                                                            |
| Paraprevotella        | 0.8377                                                            |
| Succinatimonas        | 0.8356                                                            |
| Prevotella            | 0.8305                                                            |
| Dysgonomonas          | 0.7968                                                            |
| Faecalibacterium      | 0.7857                                                            |
| Butyrivibrio          | 0.7729                                                            |
| Ruminococcus          | 0.7582                                                            |
| Eggerthella           | 0.7537                                                            |
| Phascolarctobacterium | 0.7510                                                            |
| Roseburia             | 0.7396                                                            |
| Mitsuokella           | 0.7327                                                            |
| Alistipes             | 0.7192                                                            |
| Clostridium           | 0.7131                                                            |
| Selenomonas           | 0.7092                                                            |
| Collinsella           | 0.7080                                                            |
| Blautia               | 0.6873                                                            |
| Catenibacterium       | 0.6801                                                            |
| Pseudoflavonifractor  | 0.6751                                                            |
| Abiotropha            | 0.6718                                                            |
| Peptoniphilus         | 0.6681                                                            |
| Fibrobacter           | 0.6679                                                            |
| Shuttleworthia        | 0.6557                                                            |
| Slackia               | 0.6514                                                            |
| Pyramidobacter        | 0.6484917                                                         |
| Oribacterium          | 0.6383648                                                         |
| Anaerofustis          | 0.6373584                                                         |
| Dialister             | 0.6226295                                                         |
| Turicibacter          | 0.6213367                                                         |
| Symbiobacterium       | 0.6207816                                                         |
| Atopobium             | 0.6205472                                                         |
| Akkermansia           | 0.6165538                                                         |
| Eubacterium           | 0.6146568                                                         |
| Heliobacterium        | 0.60824                                                           |
| Subdoligranulum       | 0.5925884                                                         |
| Holdemania            | 0.5870195                                                         |

|                    |           |
|--------------------|-----------|
| Desulfitobacterium | 0.5800244 |
| Solobacterium      | 0.5672282 |
| Sutterella         | 0.5654783 |
| Coprobacillus      | 0.5588766 |
| Capnocytophaga     | 0.5555231 |
| Anaerostipes       | 0.549974  |
| Acidaminococcus    | 0.5387127 |
| Bifidobacterium    | 0.5385378 |
| Coprococcus        | 0.5316589 |
| Anaerotruncus      | 0.5031967 |
| Bilophila          | 0.4909073 |
| Parabacteroides    | 0.4796097 |
| Veillonella        | 0.4790428 |
| Dorea              | 0.4777974 |
| Escherichia        | 0.4698832 |
| Megasphaera        | 0.4558009 |
| Peptostreptococcus | 0.450941  |
| Pyramidobacter     | 0.6484917 |
