# Supplementary material for: Global investigation of composition and interaction networks in gut microbiomes of individuals belonging to diverse geographies and age-groups
Source: Springer Nature journal article supplement (doi:10.1186/s13099-016-0099-z), 2016-04-23
Supplement: MOESM12 [file 10111910]

Additional File 12: Order-level affiliations of the various genera constituting the gut microbial networks of different geographies, along with the number of co-occurrence and mutual exclusion interactions between them

## **Comparison of relationships among taxonomic groups at order level in the microbial networks across different geographies**

Given the preference of specific bacterial genera to exist either in the co-occurrence or the mutual exclusion network of the gut microbiomes, the relationships between various bacterial groups in the guts of individuals from different geographies were investigated. The objective was to identify common trends of interactions that exist amongst the different bacterial groups across gut microbiomes of individuals belonging to different nationalities. For this purpose, the order-level affiliations of the various genera constituting the gut microbial networks were obtained for the different geographies, along with the number of co-occurrence and mutual exclusions among them. These were subsequently compared across different nationalities as summarized in the tables below.

In the gut microbiome of the American individuals, 126 interactions out of 866 co-occurrence relations were observed to be within genera belonging to the order Clostridiales. Clostridiales also showed a noticeably high number of positive interactions with Erysipelotrichales, Coriobacteriales, Thermoanaerobacterales, Synergistales, Bifidobacteriales, Selenomonadales, Bacillales, Lactobacillales (all more than 20 interactions). On the other hand, as observed in the previous section for the constituent genera Bacteroides, the corresponding order Bacteroidales was observed to serve as the hub for mutual exclusion relationships. Of these, the maximum number of mutual exclusion relationships (41) was found to be with the Clostridiales order.

Individuals from Denmark, Spain and China were found to have similar trend with Clostridiales order showing maximum co-occurrence interactions amongst them as well as with Synergistales, Erysipelotrichales, Fusobacteriales, Selenomonadales, Coriobacteriales (in Denmark), Clostridiales, Coriobacteriales, Thermoanaerobacterales (in Spain) and Erysipelotrichales, Coriobacteriales (in China). As in the American population, the pattern of mutual exclusion interactions also showed similar patterns (for these regions), with most of them again formed by Bacteroidales with Clostridiales. These results indicate the overall similarities in the taxonomic composition of the gut microbial co-occurrence/co-exclusion networks across different geographies.

The current study detected the largest number of co-occurrence relations between genera belonging to the same taxonomic order (Clostridiales v/s Clostridiales). Genera belonging to Clostridiales (phylum Firmicutes) were also observed to have large number of co-occurrence relationships with genera belonging to Ruminococcales, Lactobacillales and Erysipelotrichales (all belonging to the phylum Firmicutes). The gene content of bacterial species showed progressive similarity with decreasing phylogenetic distance. Consequently, bacterial groups belonging to the same taxonomic clades are expected to have similarities in their gene content and hence metabolic potential (consequently their nutrient requirements). The increased co-occurrence relationships between taxonomically similar genera could thus be a consequence of the above observation. The similarity in metabolic profile as one of the reasons for co-occurrence is further evident in the investigation of the gut microbial interaction networks across individuals from various age-groups.

America

Co-occurrence network

| Order                  | Clostridiales | Erysipelotrichales | Coriobacteriales | Synergistales | Thermoanaerobacterales | Lactobacillales | Bifidobacteriales |
|------------------------|---------------|--------------------|------------------|---------------|------------------------|-----------------|-------------------|
| Clostridiales          | 122           | 68                 | 56               | 36            | 39                     | 22              | 29                |
| Erysipelotrichales     | 68            | 4                  | 13               | 7             | 9                      | 6               | 3                 |
| Coriobacteriales       | 56            | 13                 | 6                | 11            | 9                      | 4               | 7                 |
| Synergistales          | 36            | 7                  | 11               | 3             | 8                      | 3               | 5                 |
| Thermoanaerobacterales | 39            | 9                  | 9                | 8             | 3                      | 3               | 5                 |
| Lactobacillales        | 22            | 6                  | 4                | 3             | 3                      | 0               | 3                 |
| Bifidobacteriales      | 29            | 3                  | 7                | 5             | 5                      | 3               | 1                 |
| Bacillales             | 24            | 5                  | 6                | 5             | 6                      | 2               | 2                 |
| Selenomonadales        | 24            | 8                  | 8                | 6             | 6                      | 2               | 4                 |
| Spirochaetales         | 13            | 4                  | 4                | 3             | 3                      | 2               | 1                 |
| Bacteroidales          | 0             | 0                  | 0                | 0             | 0                      | 0               | 0                 |
| Fusobacteriales        | 14            | 5                  | 3                | 1             | 4                      | 2               | 0                 |
| Acholeplasmatales      | 13            | 3                  | 3                | 2             | 3                      | 2               | 1                 |
| Desulfovibrionales     | 10            | 2                  | 4                | 2             | 1                      | 1               | 1                 |
| Asterales              | 12            | 3                  | 4                | 3             | 3                      | 1               | 1                 |
| Entomoplasmatales      | 13            | 3                  | 3                | 2             | 3                      | 2               | 1                 |
| Fibrobacteriales       | 8             | 3                  | 4                | 3             | 3                      | 1               | 1                 |
| Aeromonadales          | 5             | 0                  | 0                | 0             | 1                      | 0               | 0                 |
| Flavobacteriales       | 0             | 0                  | 0                | 0             | 0                      | 0               | 0                 |
| Dehalococcoidales      | 5             | 1                  | 1                | 1             | 1                      | 1               | 0                 |
| Burkholderiales        | 5             | 1                  | 1                | 2             | 2                      | 0               | 1                 |
| Verrucomicrobiales     | 2             | 0                  | 0                | 0             | 0                      | 0               | 0                 |
| Cytophagales           | 0             | 0                  | 0                | 0             | 0                      | 0               | 1                 |
| Actinomycetales        | 2             | 0                  | 1                | 0             | 0                      | 0               | 0                 |
| Sphingobacteriales     | 0             | 0                  | 0                | 0             | 0                      | 0               | 0                 |

| Order                  | Bacillales | Selenomonadales | Spirochaetales | Bacteroidales | Fusobacteriales | Acholeplasmatales | Desulfovibrionales |
|------------------------|------------|-----------------|----------------|---------------|-----------------|-------------------|--------------------|
| Clostridiales          | 24         | 24              | 13             | 0             | 14              | 13                | 10                 |
| Erysipelotrichales     | 5          | 8               | 4              | 0             | 5               | 3                 | 2                  |
| Coriobacteriales       | 6          | 8               | 4              | 0             | 3               | 3                 | 4                  |
| Synergistales          | 5          | 6               | 3              | 0             | 1               | 2                 | 2                  |
| Thermoanaerobacterales | 6          | 6               | 3              | 0             | 4               | 3                 | 1                  |
| Lactobacillales        | 2          | 2               | 2              | 0             | 2               | 2                 | 1                  |
| Bifidobacteriales      | 2          | 4               | 1              | 0             | 0               | 1                 | 1                  |
| Bacillales             | 1          | 4               | 2              | 0             | 2               | 2                 | 1                  |
| Selenomonadales        | 4          | 1               | 2              | 0             | 1               | 2                 | 2                  |

America

|                           |   |   |   |    |   |   |   |
|---------------------------|---|---|---|----|---|---|---|
| <b>Spirochaetales</b>     | 2 | 2 | 0 | 0  | 2 | 1 | 1 |
| <b>Bacteroidales</b>      | 0 | 0 | 0 | 13 | 0 | 0 | 0 |
| <b>Fusobacteriales</b>    | 2 | 1 | 2 | 0  | 1 | 2 | 0 |
| <b>Acholeplasmatales</b>  | 2 | 2 | 1 | 0  | 2 | 0 | 0 |
| <b>Desulfovibrionales</b> | 1 | 2 | 1 | 0  | 0 | 0 | 0 |
| <b>Asterales</b>          | 2 | 2 | 1 | 0  | 1 | 1 | 1 |
| <b>Entomoplasmatales</b>  | 2 | 2 | 1 | 0  | 2 | 1 | 0 |
| <b>Fibrobacteriales</b>   | 2 | 2 | 1 | 0  | 1 | 1 | 0 |
| <b>Aeromonadales</b>      | 0 | 0 | 1 | 0  | 0 | 0 | 0 |
| <b>Flavobacteriales</b>   | 0 | 0 | 0 | 5  | 0 | 0 | 0 |
| <b>Dehalococcoidales</b>  | 1 | 0 | 1 | 0  | 0 | 0 | 0 |
| <b>Burkholderiales</b>    | 1 | 1 | 1 | 1  | 1 | 1 | 0 |
| <b>Verrucomicrobiales</b> | 0 | 0 | 0 | 0  | 0 | 1 | 0 |
| <b>Cytophagales</b>       | 0 | 0 | 0 | 3  | 0 | 0 | 0 |
| <b>Actinomycetales</b>    | 0 | 0 | 0 | 0  | 0 | 0 | 0 |
| <b>Sphingobacteriales</b> | 0 | 0 | 0 | 1  | 0 | 0 | 0 |

| <b>Order</b>                  | <b>Asterales</b> | <b>Entomoplasmatales</b> | <b>Fibrobacteriales</b> | <b>Aeromonadales</b> | <b>Flavobacteriales</b> | <b>Dehalococcoidales</b> | <b>Burkholderiales</b> |
|-------------------------------|------------------|--------------------------|-------------------------|----------------------|-------------------------|--------------------------|------------------------|
| <b>Clostridiales</b>          | 12               | 13                       | 8                       | 5                    | 0                       | 5                        | 5                      |
| <b>Erysipelotrichales</b>     | 3                | 3                        | 3                       | 0                    | 0                       | 1                        | 1                      |
| <b>Coriobacteriales</b>       | 4                | 3                        | 4                       | 0                    | 0                       | 1                        | 1                      |
| <b>Synergistales</b>          | 3                | 2                        | 3                       | 0                    | 0                       | 1                        | 2                      |
| <b>Thermoanaerobacterales</b> | 3                | 3                        | 3                       | 1                    | 0                       | 1                        | 2                      |
| <b>Lactobacillales</b>        | 1                | 2                        | 1                       | 0                    | 0                       | 1                        | 0                      |
| <b>Bifidobacteriales</b>      | 1                | 1                        | 1                       | 0                    | 0                       | 0                        | 1                      |
| <b>Bacillales</b>             | 2                | 2                        | 2                       | 0                    | 0                       | 1                        | 1                      |
| <b>Selenomonadales</b>        | 2                | 2                        | 2                       | 0                    | 0                       | 0                        | 1                      |
| <b>Spirochaetales</b>         | 1                | 1                        | 1                       | 1                    | 0                       | 1                        | 1                      |
| <b>Bacteroidales</b>          | 0                | 0                        | 0                       | 0                    | 5                       | 0                        | 1                      |
| <b>Fusobacteriales</b>        | 1                | 2                        | 1                       | 0                    | 0                       | 0                        | 1                      |
| <b>Acholeplasmatales</b>      | 1                | 1                        | 1                       | 0                    | 0                       | 0                        | 1                      |
| <b>Desulfovibrionales</b>     | 1                | 0                        | 0                       | 0                    | 0                       | 0                        | 0                      |
| <b>Asterales</b>              | 0                | 1                        | 1                       | 0                    | 0                       | 1                        | 1                      |
| <b>Entomoplasmatales</b>      | 1                | 0                        | 1                       | 0                    | 0                       | 0                        | 1                      |
| <b>Fibrobacteriales</b>       | 1                | 1                        | 0                       | 0                    | 0                       | 0                        | 1                      |
| <b>Aeromonadales</b>          | 0                | 0                        | 0                       | 0                    | 0                       | 1                        | 0                      |
| <b>Flavobacteriales</b>       | 0                | 0                        | 0                       | 0                    | 0                       | 0                        | 0                      |
| <b>Dehalococcoidales</b>      | 1                | 0                        | 0                       | 1                    | 0                       | 0                        | 0                      |
| <b>Burkholderiales</b>        | 1                | 1                        | 1                       | 0                    | 0                       | 0                        | 0                      |

America

|                    |   |   |   |   |   |   |   |
|--------------------|---|---|---|---|---|---|---|
| Verrucomicrobiales | 0 | 0 | 0 | 0 | 0 | 0 | 0 |
| Cytophagales       | 0 | 0 | 1 | 0 | 0 | 0 | 1 |
| Actinomycetales    | 0 | 0 | 0 | 0 | 0 | 0 | 0 |
| Sphingobacteriales | 0 | 0 | 0 | 0 | 1 | 0 | 0 |

| Order                  | Verrucomicrobiales | Cytophagales | Actinomycetales | Sphingobacteriales |
|------------------------|--------------------|--------------|-----------------|--------------------|
| Clostridiales          | 2                  | 0            | 2               | 0                  |
| Erysipelotrichales     | 0                  | 0            | 0               | 0                  |
| Coriobacteriales       | 0                  | 0            | 1               | 0                  |
| Synergistales          | 0                  | 0            | 0               | 0                  |
| Thermoanaerobacterales | 0                  | 0            | 0               | 0                  |
| Lactobacillales        | 0                  | 0            | 0               | 0                  |
| Bifidobacteriales      | 0                  | 1            | 0               | 0                  |
| Bacillales             | 0                  | 0            | 0               | 0                  |
| Selenomonadales        | 0                  | 0            | 0               | 0                  |
| Spirochaetales         | 0                  | 0            | 0               | 0                  |
| Bacteroidales          | 0                  | 3            | 0               | 1                  |
| Fusobacteriales        | 0                  | 0            | 0               | 0                  |
| Acholeplasmatales      | 1                  | 0            | 0               | 0                  |
| Desulfovibrionales     | 0                  | 0            | 0               | 0                  |
| Asterales              | 0                  | 0            | 0               | 0                  |
| Entomoplasmatales      | 0                  | 0            | 0               | 0                  |
| Fibrobacteriales       | 0                  | 1            | 0               | 0                  |
| Aeromonadales          | 0                  | 0            | 0               | 0                  |
| Flavobacteriales       | 0                  | 0            | 0               | 1                  |
| Dehalococcoidales      | 0                  | 0            | 0               | 0                  |
| Burkholderiales        | 0                  | 1            | 0               | 0                  |
| Verrucomicrobiales     | 0                  | 0            | 0               | 0                  |
| Cytophagales           | 0                  | 0            | 0               | 1                  |
| Actinomycetales        | 0                  | 0            | 0               | 0                  |
| Sphingobacteriales     | 0                  | 1            | 0               | 0                  |

Mutual exclusion network

| Order             | Selenomonadales | Entomoplasmatales | Cytophagales | Coriobacteriales | Burkholderiales | Lactobacillales | Bacteroidales |
|-------------------|-----------------|-------------------|--------------|------------------|-----------------|-----------------|---------------|
| Selenomonadales   | 1               | 1                 | 1            | 1                | 1               | 0               | 2             |
| Entomoplasmatales | 1               | 0                 | 0            | 0                | 0               | 0               | 1             |
| Cytophagales      | 1               | 0                 | 0            | 0                | 0               | 0               | 0             |

America

|                                |   |   |   |   |   |   |    |
|--------------------------------|---|---|---|---|---|---|----|
| <b>Coriobacteriales</b>        | 1 | 0 | 0 | 0 | 0 | 0 | 4  |
| <b>Burkholderiales</b>         | 1 | 0 | 0 | 0 | 0 | 0 | 0  |
| <b>Lactobacillales</b>         | 0 | 0 | 0 | 0 | 0 | 0 | 1  |
| <b>Bacteroidales</b>           | 2 | 1 | 0 | 4 | 0 | 1 | 0  |
| <b>Erysipelotrichales</b>      | 0 | 0 | 0 | 0 | 0 | 0 | 5  |
| <b>Clostridiales</b>           | 0 | 0 | 1 | 0 | 2 | 0 | 41 |
| <b>Sphingobacteriales</b>      | 0 | 0 | 0 | 0 | 0 | 0 | 0  |
| <b>Fusobacteriales</b>         | 0 | 0 | 0 | 0 | 0 | 0 | 1  |
| <b>Spirochaetales</b>          | 0 | 0 | 0 | 0 | 0 | 0 | 1  |
| <b>Fibrobacterales</b>         | 0 | 0 | 0 | 0 | 0 | 0 | 1  |
| <b>Desulfovibrionales</b>      | 0 | 0 | 0 | 0 | 0 | 0 | 1  |
| <b>Bacillales</b>              | 0 | 0 | 0 | 0 | 0 | 0 | 2  |
| <b>Asterales</b>               | 0 | 0 | 0 | 0 | 0 | 0 | 1  |
| <b>Aeromonadales</b>           | 0 | 0 | 0 | 0 | 0 | 0 | 1  |
| <b>Acholeplasmatales</b>       | 0 | 0 | 0 | 0 | 0 | 0 | 1  |
| <b>Flavobacteriales</b>        | 0 | 0 | 0 | 0 | 0 | 0 | 0  |
| <b>Thermoanaerobacteriales</b> | 0 | 0 | 0 | 0 | 0 | 0 | 2  |
| <b>Bifidobacteriales</b>       | 0 | 0 | 0 | 0 | 0 | 0 | 2  |
| <b>Synergistales</b>           | 0 | 0 | 0 | 0 | 0 | 0 | 3  |

| <b>Order</b>              | <b>Erysipelotrichales</b> | <b>Clostridiales</b> | <b>Sphingobacteriales</b> | <b>Fusobacteriales</b> | <b>Spirochaetales</b> | <b>Fibrobacterales</b> | <b>Desulfovibrionales</b> |
|---------------------------|---------------------------|----------------------|---------------------------|------------------------|-----------------------|------------------------|---------------------------|
| <b>Selenomonadales</b>    | 0                         | 0                    | 0                         | 0                      | 0                     | 0                      | 0                         |
| <b>Entomoplasmatales</b>  | 0                         | 0                    | 0                         | 0                      | 0                     | 0                      | 0                         |
| <b>Cytophagales</b>       | 0                         | 1                    | 0                         | 0                      | 0                     | 0                      | 0                         |
| <b>Coriobacteriales</b>   | 0                         | 0                    | 0                         | 0                      | 0                     | 0                      | 0                         |
| <b>Burkholderiales</b>    | 0                         | 2                    | 0                         | 0                      | 0                     | 0                      | 0                         |
| <b>Lactobacillales</b>    | 0                         | 0                    | 0                         | 0                      | 0                     | 0                      | 0                         |
| <b>Bacteroidales</b>      | 5                         | 41                   | 0                         | 1                      | 1                     | 1                      | 1                         |
| <b>Erysipelotrichales</b> | 0                         | 0                    | 0                         | 0                      | 0                     | 0                      | 0                         |
| <b>Clostridiales</b>      | 0                         | 4                    | 1                         | 1                      | 0                     | 0                      | 0                         |
| <b>Sphingobacteriales</b> | 0                         | 1                    | 0                         | 0                      | 0                     | 0                      | 0                         |
| <b>Fusobacteriales</b>    | 0                         | 1                    | 0                         | 0                      | 0                     | 0                      | 0                         |
| <b>Spirochaetales</b>     | 0                         | 0                    | 0                         | 0                      | 0                     | 0                      | 0                         |
| <b>Fibrobacterales</b>    | 0                         | 0                    | 0                         | 0                      | 0                     | 0                      | 0                         |
| <b>Desulfovibrionales</b> | 0                         | 0                    | 0                         | 0                      | 0                     | 0                      | 0                         |
| <b>Bacillales</b>         | 0                         | 0                    | 0                         | 0                      | 0                     | 0                      | 0                         |
| <b>Asterales</b>          | 0                         | 0                    | 0                         | 0                      | 0                     | 0                      | 0                         |
| <b>Aeromonadales</b>      | 0                         | 0                    | 0                         | 0                      | 0                     | 0                      | 0                         |
| <b>Acholeplasmatales</b>  | 0                         | 1                    | 0                         | 0                      | 0                     | 0                      | 0                         |

America

|                               |   |   |   |   |   |   |   |
|-------------------------------|---|---|---|---|---|---|---|
| <b>Flavobacteriales</b>       | 0 | 2 | 0 | 0 | 0 | 0 | 0 |
| <b>Thermoanaerobacterales</b> | 0 | 0 | 0 | 0 | 0 | 0 | 0 |
| <b>Bifidobacteriales</b>      | 0 | 0 | 0 | 0 | 0 | 0 | 0 |
| <b>Synergistales</b>          | 0 | 0 | 0 | 0 | 0 | 0 | 0 |

| <b>Order</b>                  | <b>Bacillales</b> | <b>Asterales</b> | <b>Aeromonadales</b> | <b>Acholeplasmatales</b> | <b>Flavobacteriales</b> | <b>Thermoanaerobacterales</b> | <b>Bifidobacteriales</b> |
|-------------------------------|-------------------|------------------|----------------------|--------------------------|-------------------------|-------------------------------|--------------------------|
| <b>Selenomonadales</b>        | 0                 | 0                | 0                    | 0                        | 0                       | 0                             | 0                        |
| <b>Entomoplasmatales</b>      | 0                 | 0                | 0                    | 0                        | 0                       | 0                             | 0                        |
| <b>Cytophagales</b>           | 0                 | 0                | 0                    | 0                        | 0                       | 0                             | 0                        |
| <b>Coriobacteriales</b>       | 0                 | 0                | 0                    | 0                        | 0                       | 0                             | 0                        |
| <b>Burkholderiales</b>        | 0                 | 0                | 0                    | 0                        | 0                       | 0                             | 0                        |
| <b>Lactobacillales</b>        | 0                 | 0                | 0                    | 0                        | 0                       | 0                             | 0                        |
| <b>Bacteroidales</b>          | 2                 | 1                | 1                    | 1                        | 0                       | 2                             | 2                        |
| <b>Erysipelotrichales</b>     | 0                 | 0                | 0                    | 0                        | 0                       | 0                             | 0                        |
| <b>Clostridiales</b>          | 0                 | 0                | 0                    | 1                        | 2                       | 0                             | 0                        |
| <b>Sphingobacteriales</b>     | 0                 | 0                | 0                    | 0                        | 0                       | 0                             | 0                        |
| <b>Fusobacteriales</b>        | 0                 | 0                | 0                    | 0                        | 0                       | 0                             | 0                        |
| <b>Spirochaetales</b>         | 0                 | 0                | 0                    | 0                        | 0                       | 0                             | 0                        |
| <b>Fibrobacteriales</b>       | 0                 | 0                | 0                    | 0                        | 0                       | 0                             | 0                        |
| <b>Desulfovibrionales</b>     | 0                 | 0                | 0                    | 0                        | 0                       | 0                             | 0                        |
| <b>Bacillales</b>             | 0                 | 0                | 0                    | 0                        | 0                       | 0                             | 0                        |
| <b>Asterales</b>              | 0                 | 0                | 0                    | 0                        | 0                       | 0                             | 0                        |
| <b>Aeromonadales</b>          | 0                 | 0                | 0                    | 0                        | 0                       | 0                             | 0                        |
| <b>Acholeplasmatales</b>      | 0                 | 0                | 0                    | 0                        | 0                       | 0                             | 0                        |
| <b>Flavobacteriales</b>       | 0                 | 0                | 0                    | 0                        | 0                       | 0                             | 0                        |
| <b>Thermoanaerobacterales</b> | 0                 | 0                | 0                    | 0                        | 0                       | 0                             | 0                        |
| <b>Bifidobacteriales</b>      | 0                 | 0                | 0                    | 0                        | 0                       | 0                             | 0                        |
| <b>Synergistales</b>          | 0                 | 0                | 0                    | 0                        | 0                       | 0                             | 0                        |

| <b>Order</b>              | <b>Synergistales</b> |
|---------------------------|----------------------|
| <b>Selenomonadales</b>    | 0                    |
| <b>Entomoplasmatales</b>  | 0                    |
| <b>Cytophagales</b>       | 0                    |
| <b>Coriobacteriales</b>   | 0                    |
| <b>Burkholderiales</b>    | 0                    |
| <b>Lactobacillales</b>    | 0                    |
| <b>Bacteroidales</b>      | 3                    |
| <b>Erysipelotrichales</b> | 0                    |
| <b>Clostridiales</b>      | 0                    |

America

|                                |   |
|--------------------------------|---|
| <b>Sphingobacteriales</b>      | 0 |
| <b>Fusobacteriales</b>         | 0 |
| <b>Spirochaetales</b>          | 0 |
| <b>Fibrobacteriales</b>        | 0 |
| <b>Desulfovibrionales</b>      | 0 |
| <b>Bacillales</b>              | 0 |
| <b>Asterales</b>               | 0 |
| <b>Aeromonadales</b>           | 0 |
| <b>Acholeplasmatales</b>       | 0 |
| <b>Flavobacteriales</b>        | 0 |
| <b>Thermoanaerobacteriales</b> | 0 |
| <b>Bifidobacteriales</b>       | 0 |
| <b>Synergistales</b>           | 0 |



China

Co-occurrence network

| Order              | Clostridiales | Erysipelotrichales | Coriobacteriales | Lactobacillales | Selenomonadales | Bacteroidales | Synergistales | Asterales |
|--------------------|---------------|--------------------|------------------|-----------------|-----------------|---------------|---------------|-----------|
| Clostridiales      | 104           | 58                 | 37               | 13              | 17              | 7             | 11            | 6         |
| Erysipelotrichales | 58            | 6                  | 13               | 1               | 3               | 1             | 4             | 1         |
| Coriobacteriales   | 37            | 13                 | 6                | 0               | 7               | 2             | 4             | 2         |
| Lactobacillales    | 13            | 1                  | 0                | 0               | 0               | 0             | 0             | 0         |
| Selenomonadales    | 17            | 3                  | 7                | 0               | 7               | 5             | 4             | 4         |
| Bacteroidales      | 7             | 1                  | 2                | 0               | 5               | 10            | 1             | 0         |
| Synergistales      | 11            | 4                  | 4                | 0               | 4               | 1             | 0             | 1         |
| Asterales          | 6             | 1                  | 2                | 0               | 4               | 0             | 1             | 0         |
| Fusobacteriales    | 5             | 2                  | 3                | 0               | 0               | 0             | 0             | 0         |
| Enterobacteriales  | 0             | 0                  | 0                | 0               | 2               | 0             | 0             | 0         |
| Flavobacteriales   | 0             | 0                  | 0                | 0               | 0               | 3             | 0             | 0         |
| Desulfovibrionales | 1             | 0                  | 0                | 0               | 0               | 4             | 0             | 0         |
| Burkholderiales    | 0             | 0                  | 0                | 0               | 0               | 1             | 0             | 0         |

| Order              | Fusobacteriales | Enterobacteriales | Flavobacteriales | Desulfovibrionales | Burkholderiales |
|--------------------|-----------------|-------------------|------------------|--------------------|-----------------|
| Clostridiales      | 5               | 0                 | 0                | 1                  | 0               |
| Erysipelotrichales | 2               | 0                 | 0                | 0                  | 0               |
| Coriobacteriales   | 3               | 0                 | 0                | 0                  | 0               |
| Lactobacillales    | 0               | 0                 | 0                | 0                  | 0               |
| Selenomonadales    | 0               | 2                 | 0                | 0                  | 0               |
| Bacteroidales      | 0               | 0                 | 3                | 4                  | 1               |
| Synergistales      | 0               | 0                 | 0                | 0                  | 0               |
| Asterales          | 0               | 0                 | 0                | 0                  | 0               |
| Fusobacteriales    | 0               | 0                 | 0                | 0                  | 0               |
| Enterobacteriales  | 0               | 1                 | 0                | 0                  | 0               |
| Flavobacteriales   | 0               | 0                 | 0                | 0                  | 0               |
| Desulfovibrionales | 0               | 0                 | 0                | 0                  | 0               |
| Burkholderiales    | 0               | 0                 | 0                | 0                  | 0               |

Mutual exclusion network

| Order              | Lactobacillales | Desulfovibrionales | Burkholderiales | Fusobacteriales | Erysipelotrichales | Flavobacteriales | Clostridiales | Coriobacteriales |
|--------------------|-----------------|--------------------|-----------------|-----------------|--------------------|------------------|---------------|------------------|
| Lactobacillales    | 0               | 1                  | 1               | 0               | 0                  | 0                | 0             | 0                |
| Desulfovibrionales | 1               | 0                  | 0               | 0               | 0                  | 0                | 1             | 0                |
| Burkholderiales    | 1               | 0                  | 0               | 0               | 0                  | 0                | 0             | 0                |

China

|                           |   |   |   |   |   |   |    |   |
|---------------------------|---|---|---|---|---|---|----|---|
| <b>Fusobacteriales</b>    | 0 | 0 | 0 | 0 | 1 | 0 | 3  | 0 |
| <b>Erysipelotrichales</b> | 0 | 0 | 0 | 1 | 0 | 0 | 0  | 0 |
| <b>Flavobacteriales</b>   | 0 | 0 | 0 | 0 | 0 | 0 | 1  | 0 |
| <b>Clostridiales</b>      | 0 | 1 | 0 | 3 | 0 | 1 | 0  | 0 |
| <b>Coriobacteriales</b>   | 0 | 0 | 0 | 0 | 0 | 0 | 0  | 0 |
| <b>Selenomonadales</b>    | 0 | 0 | 0 | 0 | 0 | 0 | 7  | 1 |
| <b>Bacteroidales</b>      | 2 | 0 | 0 | 0 | 2 | 0 | 29 | 1 |
| <b>Synergistales</b>      | 0 | 0 | 0 | 0 | 0 | 0 | 0  | 0 |
| <b>Enterobacteriales</b>  | 2 | 0 | 0 | 0 | 0 | 0 | 14 | 0 |

| <b>Order</b>              | <b>Selenomonadales</b> | <b>Bacteroidales</b> | <b>Synergistales</b> | <b>Enterobacteriales</b> |
|---------------------------|------------------------|----------------------|----------------------|--------------------------|
| <b>Lactobacillales</b>    | 0                      | 2                    | 0                    | 2                        |
| <b>Desulfovibrionales</b> | 0                      | 0                    | 0                    | 0                        |
| <b>Burkholderiales</b>    | 0                      | 0                    | 0                    | 0                        |
| <b>Fusobacteriales</b>    | 0                      | 0                    | 0                    | 0                        |
| <b>Erysipelotrichales</b> | 0                      | 2                    | 0                    | 0                        |
| <b>Flavobacteriales</b>   | 0                      | 0                    | 0                    | 0                        |
| <b>Clostridiales</b>      | 7                      | 29                   | 0                    | 14                       |
| <b>Coriobacteriales</b>   | 1                      | 1                    | 0                    | 0                        |
| <b>Selenomonadales</b>    | 0                      | 3                    | 0                    | 0                        |
| <b>Bacteroidales</b>      | 3                      | 0                    | 1                    | 0                        |
| <b>Synergistales</b>      | 0                      | 1                    | 0                    | 0                        |
| <b>Enterobacteriales</b>  | 0                      | 0                    | 0                    | 0                        |

## Denmark

## Co-occurrence network

| Order                  | Clostridiales | Synergistales | Erysipelotrichales | Fusobacteriales | Thermoanaerobacterales | Selenomonadales | Coriobacteriales |
|------------------------|---------------|---------------|--------------------|-----------------|------------------------|-----------------|------------------|
| Clostridiales          | 40            | 24            | 24                 | 20              | 12                     | 16              | 16               |
| Synergistales          | 24            | 3             | 5                  | 1               | 3                      | 5               | 6                |
| Erysipelotrichales     | 24            | 5             | 3                  | 8               | 6                      | 4               | 0                |
| Fusobacteriales        | 20            | 1             | 8                  | 3               | 6                      | 0               | 0                |
| Thermoanaerobacterales | 12            | 3             | 6                  | 6               | 1                      | 1               | 0                |
| Selenomonadales        | 16            | 5             | 4                  | 0               | 1                      | 3               | 6                |
| Coriobacteriales       | 16            | 6             | 0                  | 0               | 0                      | 6               | 3                |
| Bacillales             | 14            | 2             | 4                  | 3               | 2                      | 3               | 2                |
| Asterales              | 9             | 3             | 3                  | 0               | 2                      | 3               | 2                |
| Acholeplasmatales      | 8             | 1             | 4                  | 3               | 2                      | 1               | 0                |
| Lactobacillales        | 11            | 1             | 4                  | 4               | 4                      | 1               | 0                |
| Mycoplasmatales        | 10            | 2             | 3                  | 3               | 2                      | 1               | 0                |
| Entomoplasmatales      | 8             | 1             | 4                  | 3               | 2                      | 1               | 0                |
| Bifidobacteriales      | 8             | 3             | 0                  | 0               | 0                      | 2               | 3                |
| Spirochaetales         | 7             | 1             | 2                  | 4               | 3                      | 1               | 0                |
| Verrucomicrobiales     | 3             | 3             | 2                  | 1               | 1                      | 1               | 2                |
| Bacteroidales          | 3             | 0             | 0                  | 0               | 0                      | 0               | 0                |
| Rhodospirillales       | 2             | 1             | 0                  | 2               | 0                      | 0               | 0                |
| Flavobacteriales       | 0             | 0             | 0                  | 0               | 0                      | 0               | 0                |
| Desulfovibrionales     | 3             | 2             | 0                  | 0               | 0                      | 0               | 0                |
| Fibrobacteriales       | 1             | 0             | 0                  | 0               | 0                      | 0               | 0                |
| Dehalococcoidales      | 1             | 0             | 0                  | 0               | 0                      | 0               | 0                |

| Order                  | Bacillales | Asterales | Acholeplasmatales | Lactobacillales | Mycoplasmatales | Entomoplasmatales | Bifidobacteriales |
|------------------------|------------|-----------|-------------------|-----------------|-----------------|-------------------|-------------------|
| Clostridiales          | 14         | 9         | 8                 | 11              | 10              | 8                 | 8                 |
| Synergistales          | 2          | 3         | 1                 | 1               | 2               | 1                 | 3                 |
| Erysipelotrichales     | 4          | 3         | 4                 | 4               | 3               | 4                 | 0                 |
| Fusobacteriales        | 3          | 0         | 3                 | 4               | 3               | 3                 | 0                 |
| Thermoanaerobacterales | 2          | 2         | 2                 | 4               | 2               | 2                 | 0                 |
| Selenomonadales        | 3          | 3         | 1                 | 1               | 1               | 1                 | 2                 |
| Coriobacteriales       | 2          | 2         | 0                 | 0               | 0               | 0                 | 3                 |
| Bacillales             | 0          | 2         | 2                 | 3               | 2               | 2                 | 1                 |
| Asterales              | 2          | 0         | 1                 | 1               | 1               | 1                 | 1                 |
| Acholeplasmatales      | 2          | 1         | 0                 | 2               | 1               | 1                 | 0                 |
| Lactobacillales        | 3          | 1         | 2                 | 1               | 2               | 1                 | 0                 |
| Mycoplasmatales        | 2          | 1         | 1                 | 2               | 0               | 1                 | 1                 |

## Denmark

|                    |   |   |   |   |   |   |   |
|--------------------|---|---|---|---|---|---|---|
| Entomoplasmatales  | 2 | 1 | 1 | 1 | 1 | 0 | 0 |
| Bifidobacteriales  | 1 | 1 | 0 | 0 | 1 | 0 | 0 |
| Spirochaetales     | 1 | 0 | 2 | 3 | 2 | 2 | 0 |
| Verrucomicrobiales | 0 | 1 | 0 | 0 | 1 | 0 | 1 |
| Bacteroidales      | 0 | 0 | 0 | 0 | 0 | 0 | 0 |
| Rhodospirillales   | 0 | 0 | 0 | 2 | 0 | 0 | 0 |
| Flavobacteriales   | 0 | 0 | 0 | 0 | 0 | 0 | 0 |
| Desulfovibrionales | 1 | 0 | 0 | 0 | 1 | 0 | 1 |
| Fibrobacterales    | 0 | 0 | 0 | 0 | 0 | 1 | 0 |
| Dehalococcoidales  | 0 | 0 | 0 | 0 | 0 | 0 | 0 |

| Order                  | Spirochaetales | Verrucomicrobiales | Bacteroidales | Rhodospirillales | Flavobacteriales | Desulfovibrionales | Fibrobacterales |
|------------------------|----------------|--------------------|---------------|------------------|------------------|--------------------|-----------------|
| Clostridiales          | 7              | 3                  | 3             | 2                | 0                | 3                  | 1               |
| Synergistales          | 1              | 3                  | 0             | 1                | 0                | 2                  | 0               |
| Erysipelotrichales     | 2              | 2                  | 0             | 0                | 0                | 0                  | 0               |
| Fusobacteriales        | 4              | 1                  | 0             | 2                | 0                | 0                  | 0               |
| Thermoanaerobacterales | 3              | 1                  | 0             | 0                | 0                | 0                  | 0               |
| Selenomonadales        | 1              | 1                  | 0             | 0                | 0                | 0                  | 0               |
| Coriobacteriales       | 0              | 2                  | 0             | 0                | 0                | 0                  | 0               |
| Bacillales             | 1              | 0                  | 0             | 0                | 0                | 1                  | 0               |
| Asterales              | 0              | 1                  | 0             | 0                | 0                | 0                  | 0               |
| Acholeplasmatales      | 2              | 0                  | 0             | 0                | 0                | 0                  | 0               |
| Lactobacillales        | 3              | 0                  | 0             | 2                | 0                | 0                  | 0               |
| Mycoplasmatales        | 2              | 1                  | 0             | 0                | 0                | 1                  | 0               |
| Entomoplasmatales      | 2              | 0                  | 0             | 0                | 0                | 0                  | 1               |
| Bifidobacteriales      | 0              | 1                  | 0             | 0                | 0                | 1                  | 0               |
| Spirochaetales         | 0              | 0                  | 0             | 1                | 0                | 1                  | 1               |
| Verrucomicrobiales     | 0              | 0                  | 0             | 0                | 0                | 0                  | 0               |
| Bacteroidales          | 0              | 0                  | 3             | 0                | 2                | 2                  | 0               |
| Rhodospirillales       | 1              | 0                  | 0             | 1                | 0                | 2                  | 0               |
| Flavobacteriales       | 0              | 0                  | 2             | 0                | 0                | 0                  | 0               |
| Desulfovibrionales     | 1              | 0                  | 2             | 2                | 0                | 0                  | 0               |
| Fibrobacterales        | 1              | 0                  | 0             | 0                | 0                | 0                  | 0               |
| Dehalococcoidales      | 0              | 0                  | 0             | 0                | 0                | 0                  | 0               |

| Order              | Dehalococcoidales |
|--------------------|-------------------|
| Clostridiales      | 1                 |
| Synergistales      | 0                 |
| Erysipelotrichales | 0                 |

## Denmark

|                               |   |
|-------------------------------|---|
| <b>Fusobacteriales</b>        | 0 |
| <b>Thermoanaerobacterales</b> | 0 |
| <b>Selenomonadales</b>        | 0 |
| <b>Coriobacteriales</b>       | 0 |
| <b>Bacillales</b>             | 0 |
| <b>Asterales</b>              | 0 |
| <b>Acholeplasmatales</b>      | 0 |
| <b>Lactobacillales</b>        | 0 |
| <b>Mycoplasmatales</b>        | 0 |
| <b>Entomoplasmatales</b>      | 0 |
| <b>Bifidobacteriales</b>      | 0 |
| <b>Spirochaetales</b>         | 0 |
| <b>Verrucomicrobiales</b>     | 0 |
| <b>Bacteroidales</b>          | 0 |
| <b>Rhodospirillales</b>       | 0 |
| <b>Flavobacteriales</b>       | 0 |
| <b>Desulfovibrionales</b>     | 0 |
| <b>Fibrobacteriales</b>       | 0 |
| <b>Dehalococcoidales</b>      | 0 |

## Mutual exclusion network

| Order                         | Selenomonadales | Clostridiales | Mycoplasmatales | Entomoplasmatales | Coriobacteriales | Burkholderiales | Synergistales |
|-------------------------------|-----------------|---------------|-----------------|-------------------|------------------|-----------------|---------------|
| <b>Selenomonadales</b>        | 1               | 2             | 0               | 0                 | 0                | 0               | 0             |
| <b>Clostridiales</b>          | 2               | 8             | 1               | 2                 | 2                | 0               | 3             |
| <b>Mycoplasmatales</b>        | 0               | 1             | 0               | 0                 | 0                | 0               | 0             |
| <b>Entomoplasmatales</b>      | 0               | 2             | 0               | 0                 | 0                | 0               | 0             |
| <b>Coriobacteriales</b>       | 0               | 2             | 0               | 0                 | 0                | 1               | 0             |
| <b>Burkholderiales</b>        | 0               | 0             | 0               | 0                 | 1                | 0               | 0             |
| <b>Synergistales</b>          | 0               | 3             | 0               | 0                 | 0                | 0               | 0             |
| <b>Bacillales</b>             | 0               | 2             | 0               | 0                 | 0                | 0               | 0             |
| <b>Bifidobacteriales</b>      | 0               | 1             | 0               | 0                 | 0                | 0               | 0             |
| <b>Bacteroidales</b>          | 2               | 11            | 0               | 1                 | 0                | 0               | 0             |
| <b>Thermoanaerobacterales</b> | 0               | 0             | 0               | 0                 | 0                | 0               | 0             |
| <b>Fusobacteriales</b>        | 0               | 2             | 0               | 0                 | 0                | 0               | 0             |
| <b>Asterales</b>              | 0               | 1             | 0               | 0                 | 0                | 0               | 0             |
| <b>Acholeplasmatales</b>      | 0               | 2             | 0               | 0                 | 0                | 0               | 0             |
| <b>Verrucomicrobiales</b>     | 0               | 2             | 0               | 0                 | 0                | 0               | 0             |

## Denmark

|                    |   |   |   |   |   |   |   |
|--------------------|---|---|---|---|---|---|---|
| Erysipelotrichales | 0 | 6 | 0 | 0 | 0 | 0 | 0 |
|--------------------|---|---|---|---|---|---|---|

| Order                  | Bacillales | Bifidobacteriales | Bacteroidales | Thermoanaerobacterales | Fusobacteriales | Asterales | Acholeplasmatales |
|------------------------|------------|-------------------|---------------|------------------------|-----------------|-----------|-------------------|
| Selenomonadales        | 0          | 0                 | 2             | 0                      | 0               | 0         | 0                 |
| Clostridiales          | 2          | 1                 | 11            | 0                      | 2               | 1         | 2                 |
| Mycoplasmatales        | 0          | 0                 | 0             | 0                      | 0               | 0         | 0                 |
| Entomoplasmatales      | 0          | 0                 | 1             | 0                      | 0               | 0         | 0                 |
| Coriobacteriales       | 0          | 0                 | 0             | 0                      | 0               | 0         | 0                 |
| Burkholderiales        | 0          | 0                 | 0             | 0                      | 0               | 0         | 0                 |
| Synergistales          | 0          | 0                 | 0             | 0                      | 0               | 0         | 0                 |
| Bacillales             | 0          | 0                 | 1             | 0                      | 0               | 0         | 0                 |
| Bifidobacteriales      | 0          | 0                 | 1             | 0                      | 0               | 0         | 0                 |
| Bacteroidales          | 1          | 1                 | 3             | 1                      | 1               | 1         | 1                 |
| Thermoanaerobacterales | 0          | 0                 | 1             | 0                      | 0               | 0         | 0                 |
| Fusobacteriales        | 0          | 0                 | 1             | 0                      | 0               | 0         | 0                 |
| Asterales              | 0          | 0                 | 1             | 0                      | 0               | 0         | 0                 |
| Acholeplasmatales      | 0          | 0                 | 1             | 0                      | 0               | 0         | 0                 |
| Verrucomicrobiales     | 0          | 0                 | 0             | 0                      | 0               | 0         | 0                 |
| Erysipelotrichales     | 0          | 0                 | 0             | 0                      | 0               | 0         | 0                 |

| Order                  | Verrucomicrobiales | Erysipelotrichales |
|------------------------|--------------------|--------------------|
| Selenomonadales        | 0                  | 0                  |
| Clostridiales          | 2                  | 6                  |
| Mycoplasmatales        | 0                  | 0                  |
| Entomoplasmatales      | 0                  | 0                  |
| Coriobacteriales       | 0                  | 0                  |
| Burkholderiales        | 0                  | 0                  |
| Synergistales          | 0                  | 0                  |
| Bacillales             | 0                  | 0                  |
| Bifidobacteriales      | 0                  | 0                  |
| Bacteroidales          | 0                  | 0                  |
| Thermoanaerobacterales | 0                  | 0                  |
| Fusobacteriales        | 0                  | 0                  |
| Asterales              | 0                  | 0                  |
| Acholeplasmatales      | 0                  | 0                  |
| Verrucomicrobiales     | 0                  | 0                  |
| Erysipelotrichales     | 0                  | 0                  |

## Co-occurrence network

| Order                  | Clostridiales | Selenomonadales | Actinomycetales | Thermoanaerobacterales | Synergistales | Erysipelotrichales | Cytophagales |
|------------------------|---------------|-----------------|-----------------|------------------------|---------------|--------------------|--------------|
| Clostridiales          | 9             | 3               | 3               | 1                      | 1             | 2                  | 0            |
| Selenomonadales        | 3             | 0               | 1               | 0                      | 1             | 0                  | 0            |
| Actinomycetales        | 3             | 1               | 0               | 0                      | 2             | 0                  | 0            |
| Thermoanaerobacterales | 1             | 0               | 0               | 0                      | 2             | 0                  | 0            |
| Synergistales          | 1             | 1               | 2               | 2                      | 1             | 0                  | 0            |
| Erysipelotrichales     | 2             | 0               | 0               | 0                      | 0             | 1                  | 0            |
| Cytophagales           | 0             | 0               | 0               | 0                      | 0             | 0                  | 0            |
| Rhodospirillales       | 0             | 0               | 0               | 0                      | 0             | 0                  | 2            |
| Bifidobacteriales      | 2             | 1               | 0               | 0                      | 0             | 0                  | 1            |
| Bacillales             | 3             | 0               | 1               | 1                      | 1             | 0                  | 1            |
| Burkholderiales        | 0             | 0               | 0               | 0                      | 0             | 0                  | 0            |
| Verrucomicrobiales     | 0             | 0               | 0               | 0                      | 0             | 0                  | 0            |
| Bacteroidales          | 1             | 1               | 0               | 0                      | 0             | 0                  | 0            |
| Sphaerobacterales      | 0             | 0               | 0               | 1                      | 1             | 0                  | 0            |
| Spirochaetales         | 1             | 0               | 0               | 0                      | 0             | 1                  | 0            |
| Cardiobacteriales      | 0             | 0               | 0               | 0                      | 0             | 1                  | 0            |
| Rubrobacterales        | 0             | 0               | 0               | 0                      | 0             | 0                  | 0            |
| Opitutales             | 0             | 0               | 0               | 0                      | 0             | 0                  | 1            |
| Caulobacterales        | 0             | 0               | 0               | 0                      | 0             | 0                  | 0            |
| Neisseriales           | 0             | 0               | 0               | 0                      | 0             | 0                  | 0            |
| Methanobacteriales     | 0             | 0               | 0               | 0                      | 0             | 0                  | 0            |
| Methanomicrobiales     | 1             | 0               | 1               | 0                      | 0             | 0                  | 0            |
| Flavobacteriales       | 1             | 0               | 0               | 0                      | 0             | 0                  | 0            |
| Fibrobacterales        | 0             | 0               | 0               | 0                      | 0             | 0                  | 1            |
| Entomoplasmatales      | 0             | 0               | 0               | 0                      | 0             | 0                  | 0            |
| Enterobacteriales      | 0             | 0               | 0               | 0                      | 0             | 0                  | 0            |
| Desulfovibrionales     | 0             | 1               | 0               | 0                      | 0             | 0                  | 0            |
| Desulfobacterales      | 0             | 0               | 0               | 0                      | 0             | 0                  | 1            |
| Chromatiales           | 0             | 0               | 0               | 1                      | 0             | 0                  | 1            |
| Coriobacteriales       | 1             | 0               | 0               | 0                      | 0             | 0                  | 0            |
| Fusobacteriales        | 1             | 0               | 0               | 0                      | 0             | 0                  | 0            |
| Bacteroidetes          | 1             | 0               | 0               | 0                      | 0             | 0                  | 0            |
| Chlorobiales           | 1             | 0               | 0               | 0                      | 0             | 0                  | 0            |
| Asterales              | 0             | 0               | 0               | 0                      | 0             | 0                  | 0            |
| Acholeplasmatales      | 0             | 0               | 0               | 0                      | 0             | 0                  | 0            |

## France

| Order                  | Rhodospirillales | Bifidobacteriales | Bacillales | Burkholderiales | Verrucomicrobiales | Bacteroidales | Sphaerobacterales |
|------------------------|------------------|-------------------|------------|-----------------|--------------------|---------------|-------------------|
| Clostridiales          | 0                | 2                 | 3          | 0               | 0                  | 1             | 0                 |
| Selenomonadales        | 0                | 1                 | 0          | 0               | 0                  | 1             | 0                 |
| Actinomycetales        | 0                | 0                 | 1          | 0               | 0                  | 0             | 0                 |
| Thermoanaerobacterales | 0                | 0                 | 1          | 0               | 0                  | 0             | 1                 |
| Synergistales          | 0                | 0                 | 1          | 0               | 0                  | 0             | 1                 |
| Erysipelotrichales     | 0                | 0                 | 0          | 0               | 0                  | 0             | 0                 |
| Cytophagales           | 2                | 1                 | 1          | 0               | 0                  | 0             | 0                 |
| Rhodospirillales       | 0                | 1                 | 1          | 0               | 0                  | 0             | 0                 |
| Bifidobacteriales      | 1                | 0                 | 0          | 0               | 0                  | 0             | 0                 |
| Bacillales             | 1                | 0                 | 0          | 2               | 0                  | 0             | 1                 |
| Burkholderiales        | 0                | 0                 | 2          | 0               | 0                  | 0             | 0                 |
| Verrucomicrobiales     | 0                | 0                 | 0          | 0               | 0                  | 1             | 0                 |
| Bacteroidales          | 0                | 0                 | 0          | 0               | 1                  | 0             | 0                 |
| Sphaerobacterales      | 0                | 0                 | 1          | 0               | 0                  | 0             | 0                 |
| Spirochaetales         | 0                | 0                 | 0          | 0               | 0                  | 0             | 0                 |
| Cardiobacteriales      | 0                | 0                 | 0          | 0               | 0                  | 0             | 0                 |
| Rubrobacterales        | 0                | 1                 | 0          | 0               | 0                  | 0             | 0                 |
| Opitutales             | 1                | 1                 | 0          | 0               | 0                  | 0             | 0                 |
| Caulobacterales        | 1                | 1                 | 0          | 0               | 0                  | 0             | 0                 |
| Neisseriales           | 0                | 0                 | 0          | 0               | 0                  | 0             | 0                 |
| Methanobacteriales     | 0                | 0                 | 0          | 0               | 0                  | 0             | 0                 |
| Methanomicrobiales     | 0                | 0                 | 1          | 0               | 0                  | 0             | 0                 |
| Flavobacteriales       | 0                | 0                 | 0          | 0               | 0                  | 0             | 0                 |
| Fibrobacterales        | 1                | 0                 | 1          | 0               | 0                  | 0             | 0                 |
| Entomoplasmatales      | 0                | 0                 | 0          | 1               | 0                  | 0             | 0                 |
| Enterobacteriales      | 0                | 0                 | 0          | 0               | 0                  | 0             | 0                 |
| Desulfovibrionales     | 1                | 1                 | 0          | 0               | 0                  | 0             | 0                 |
| Desulfobacterales      | 1                | 1                 | 0          | 0               | 0                  | 0             | 0                 |
| Chromatiales           | 0                | 1                 | 1          | 0               | 0                  | 0             | 0                 |
| Coriobacteriales       | 0                | 0                 | 0          | 0               | 0                  | 1             | 0                 |
| Fusobacteriales        | 0                | 0                 | 0          | 0               | 0                  | 0             | 0                 |
| Bacteroidetes          | 0                | 0                 | 0          | 0               | 0                  | 0             | 0                 |
| Chlorobiales           | 0                | 0                 | 0          | 0               | 0                  | 0             | 0                 |
| Asterales              | 0                | 0                 | 0          | 0               | 0                  | 1             | 0                 |
| Acholeplasmatales      | 0                | 0                 | 0          | 0               | 0                  | 0             | 0                 |

| Order         | Spirochaetales | Cardiobacteriales | Rubrobacterales | Opitutales | Caulobacterales | Neisseriales | Methanobacteriales |
|---------------|----------------|-------------------|-----------------|------------|-----------------|--------------|--------------------|
| Clostridiales | 1              | 0                 | 0               | 0          | 0               | 0            | 0                  |



France

|                               |   |   |   |   |   |   |   |
|-------------------------------|---|---|---|---|---|---|---|
| <b>Selenomonadales</b>        | 0 | 0 | 0 | 0 | 0 | 0 | 0 |
| <b>Actinomycetales</b>        | 0 | 0 | 0 | 0 | 0 | 0 | 0 |
| <b>Thermoanaerobacterales</b> | 0 | 0 | 0 | 0 | 0 | 0 | 0 |
| <b>Synergistales</b>          | 0 | 0 | 0 | 0 | 0 | 0 | 0 |
| <b>Erysipelotrichales</b>     | 1 | 1 | 0 | 0 | 0 | 0 | 0 |
| <b>Cytophagales</b>           | 0 | 0 | 0 | 1 | 0 | 0 | 0 |
| <b>Rhodospirillales</b>       | 0 | 0 | 0 | 1 | 1 | 0 | 0 |
| <b>Bifidobacteriales</b>      | 0 | 0 | 1 | 1 | 1 | 0 | 0 |
| <b>Bacillales</b>             | 0 | 0 | 0 | 0 | 0 | 0 | 0 |
| <b>Burkholderiales</b>        | 0 | 0 | 0 | 0 | 0 | 0 | 0 |
| <b>Verrucomicrobiales</b>     | 0 | 0 | 0 | 0 | 0 | 0 | 0 |
| <b>Bacteroidales</b>          | 0 | 0 | 0 | 0 | 0 | 0 | 0 |
| <b>Sphaerobacterales</b>      | 0 | 0 | 0 | 0 | 0 | 0 | 0 |
| <b>Spirochaetales</b>         | 0 | 1 | 0 | 0 | 0 | 0 | 0 |
| <b>Cardiobacteriales</b>      | 1 | 0 | 0 | 0 | 0 | 0 | 0 |
| <b>Rubrobacterales</b>        | 0 | 0 | 0 | 0 | 0 | 0 | 0 |
| <b>Opitutales</b>             | 0 | 0 | 0 | 0 | 1 | 0 | 0 |
| <b>Caulobacterales</b>        | 0 | 0 | 0 | 1 | 0 | 0 | 0 |
| <b>Neisseriales</b>           | 0 | 0 | 0 | 0 | 0 | 0 | 1 |
| <b>Methanobacteriales</b>     | 0 | 0 | 0 | 0 | 0 | 1 | 0 |
| <b>Methanomicrobiales</b>     | 0 | 0 | 0 | 0 | 0 | 0 | 0 |
| <b>Flavobacteriales</b>       | 0 | 0 | 0 | 0 | 0 | 0 | 0 |
| <b>Fibrobacterales</b>        | 0 | 0 | 0 | 1 | 0 | 0 | 0 |
| <b>Entomoplasmatales</b>      | 0 | 0 | 0 | 0 | 0 | 0 | 0 |
| <b>Enterobacteriales</b>      | 1 | 0 | 0 | 0 | 0 | 0 | 0 |
| <b>Desulfovibrionales</b>     | 0 | 0 | 0 | 1 | 1 | 0 | 0 |
| <b>Desulfobacterales</b>      | 0 | 0 | 0 | 1 | 1 | 0 | 0 |
| <b>Chromatiales</b>           | 0 | 0 | 0 | 0 | 0 | 0 | 0 |
| <b>Coriobacteriales</b>       | 0 | 0 | 0 | 0 | 0 | 0 | 0 |
| <b>Fusobacteriales</b>        | 0 | 0 | 0 | 0 | 0 | 0 | 0 |
| <b>Bacteroidetes</b>          | 0 | 0 | 0 | 0 | 1 | 0 | 0 |
| <b>Chlorobiales</b>           | 0 | 0 | 0 | 0 | 1 | 0 | 0 |
| <b>Asterales</b>              | 0 | 0 | 0 | 0 | 0 | 0 | 0 |
| <b>Acholeplasmatales</b>      | 0 | 0 | 0 | 0 | 0 | 0 | 0 |

| <b>Order</b>           | <b>Methanomicrobiales</b> | <b>Flavobacteriales</b> | <b>Fibrobacterales</b> | <b>Entomoplasmatales</b> | <b>Enterobacteriales</b> | <b>Desulfovibrionales</b> | <b>Desulfobacterales</b> |
|------------------------|---------------------------|-------------------------|------------------------|--------------------------|--------------------------|---------------------------|--------------------------|
| <b>Clostridiales</b>   | 1                         | 1                       | 0                      | 0                        | 0                        | 0                         | 0                        |
| <b>Selenomonadales</b> | 0                         | 0                       | 0                      | 0                        | 0                        | 1                         | 0                        |
| <b>Actinomycetales</b> | 1                         | 0                       | 0                      | 0                        | 0                        | 0                         | 0                        |

France

|                               |   |   |   |   |   |   |   |
|-------------------------------|---|---|---|---|---|---|---|
| <b>Thermoanaerobacterales</b> | 0 | 0 | 0 | 0 | 0 | 0 | 0 |
| <b>Synergistales</b>          | 0 | 0 | 0 | 0 | 0 | 0 | 0 |
| <b>Erysipelotrichales</b>     | 0 | 0 | 0 | 0 | 0 | 0 | 0 |
| <b>Cytophagales</b>           | 0 | 0 | 1 | 0 | 0 | 0 | 1 |
| <b>Rhodospirillales</b>       | 0 | 0 | 1 | 0 | 0 | 1 | 1 |
| <b>Bifidobacteriales</b>      | 0 | 0 | 0 | 0 | 0 | 1 | 1 |
| <b>Bacillales</b>             | 1 | 0 | 1 | 0 | 0 | 0 | 0 |
| <b>Burkholderiales</b>        | 0 | 0 | 0 | 1 | 0 | 0 | 0 |
| <b>Verrucomicrobiales</b>     | 0 | 0 | 0 | 0 | 0 | 0 | 0 |
| <b>Bacteroidales</b>          | 0 | 0 | 0 | 0 | 0 | 0 | 0 |
| <b>Sphaerobacterales</b>      | 0 | 0 | 0 | 0 | 0 | 0 | 0 |
| <b>Spirochaetales</b>         | 0 | 0 | 0 | 0 | 1 | 0 | 0 |
| <b>Cardiobacteriales</b>      | 0 | 0 | 0 | 0 | 0 | 0 | 0 |
| <b>Rubrobacterales</b>        | 0 | 0 | 0 | 0 | 0 | 0 | 0 |
| <b>Opitutales</b>             | 0 | 0 | 1 | 0 | 0 | 1 | 1 |
| <b>Caulobacterales</b>        | 0 | 0 | 0 | 0 | 0 | 1 | 1 |
| <b>Neisseriales</b>           | 0 | 0 | 0 | 0 | 0 | 0 | 0 |
| <b>Methanobacteriales</b>     | 0 | 0 | 0 | 0 | 0 | 0 | 0 |
| <b>Methanomicrobiales</b>     | 0 | 0 | 0 | 0 | 0 | 0 | 0 |
| <b>Flavobacteriales</b>       | 0 | 0 | 0 | 0 | 0 | 0 | 0 |
| <b>Fibrobacterales</b>        | 0 | 0 | 0 | 0 | 0 | 0 | 1 |
| <b>Entomoplasmatales</b>      | 0 | 0 | 0 | 0 | 0 | 0 | 0 |
| <b>Enterobacteriales</b>      | 0 | 0 | 0 | 0 | 0 | 0 | 0 |
| <b>Desulfovibrionales</b>     | 0 | 0 | 0 | 0 | 0 | 0 | 1 |
| <b>Desulfobacterales</b>      | 0 | 0 | 1 | 0 | 0 | 1 | 0 |
| <b>Chromatiales</b>           | 0 | 0 | 0 | 0 | 0 | 0 | 0 |
| <b>Coriobacteriales</b>       | 0 | 0 | 0 | 0 | 0 | 0 | 0 |
| <b>Fusobacteriales</b>        | 0 | 0 | 0 | 0 | 0 | 0 | 0 |
| <b>Bacteroidetes</b>          | 0 | 0 | 0 | 0 | 0 | 0 | 0 |
| <b>Chlorobiales</b>           | 0 | 0 | 0 | 0 | 0 | 0 | 0 |
| <b>Asterales</b>              | 0 | 0 | 0 | 0 | 0 | 0 | 0 |
| <b>Acholeplasmatales</b>      | 0 | 0 | 0 | 1 | 0 | 0 | 1 |

| <b>Order</b>                  | <b>Chromatiales</b> | <b>Coriobacteriales</b> | <b>Fusobacteriales</b> | <b>Bacteroidetes</b> | <b>Chlorobiales</b> | <b>Asterales</b> | <b>Acholeplasmatales</b> |
|-------------------------------|---------------------|-------------------------|------------------------|----------------------|---------------------|------------------|--------------------------|
| <b>Clostridiales</b>          | 0                   | 1                       | 1                      | 1                    | 1                   | 0                | 0                        |
| <b>Selenomonadales</b>        | 0                   | 0                       | 0                      | 0                    | 0                   | 0                | 0                        |
| <b>Actinomycetales</b>        | 0                   | 0                       | 0                      | 0                    | 0                   | 0                | 0                        |
| <b>Thermoanaerobacterales</b> | 1                   | 0                       | 0                      | 0                    | 0                   | 0                | 0                        |
| <b>Synergistales</b>          | 0                   | 0                       | 0                      | 0                    | 0                   | 0                | 0                        |

France

|                    |   |   |   |   |   |   |   |
|--------------------|---|---|---|---|---|---|---|
| Erysipelotrichales | 0 | 0 | 0 | 0 | 0 | 0 | 0 |
| Cytophagales       | 1 | 0 | 0 | 0 | 0 | 0 | 0 |
| Rhodospirillales   | 0 | 0 | 0 | 0 | 0 | 0 | 0 |
| Bifidobacteriales  | 1 | 0 | 0 | 0 | 0 | 0 | 0 |
| Bacillales         | 1 | 0 | 0 | 0 | 0 | 0 | 0 |
| Burkholderiales    | 0 | 0 | 0 | 0 | 0 | 0 | 0 |
| Verrucomicrobiales | 0 | 0 | 0 | 0 | 0 | 0 | 0 |
| Bacteroidales      | 0 | 1 | 0 | 0 | 0 | 1 | 0 |
| Sphaerobacterales  | 0 | 0 | 0 | 0 | 0 | 0 | 0 |
| Spirochaetales     | 0 | 0 | 0 | 0 | 0 | 0 | 0 |
| Cardiobacteriales  | 0 | 0 | 0 | 0 | 0 | 0 | 0 |
| Rubrobacterales    | 0 | 0 | 0 | 0 | 0 | 0 | 0 |
| Opitutales         | 0 | 0 | 0 | 0 | 0 | 0 | 0 |
| Caulobacterales    | 0 | 0 | 0 | 1 | 1 | 0 | 0 |
| Neisseriales       | 0 | 0 | 0 | 0 | 0 | 0 | 0 |
| Methanobacteriales | 0 | 0 | 0 | 0 | 0 | 0 | 0 |
| Methanomicrobiales | 0 | 0 | 0 | 0 | 0 | 0 | 0 |
| Flavobacteriales   | 0 | 0 | 0 | 0 | 0 | 0 | 0 |
| Fibrobacterales    | 0 | 0 | 0 | 0 | 0 | 0 | 0 |
| Entomoplasmatales  | 0 | 0 | 0 | 0 | 0 | 0 | 1 |
| Enterobacteriales  | 0 | 0 | 0 | 0 | 0 | 0 | 0 |
| Desulfovibrionales | 0 | 0 | 0 | 0 | 0 | 0 | 0 |
| Desulfobacterales  | 0 | 0 | 0 | 0 | 0 | 0 | 1 |
| Chromatiales       | 0 | 0 | 0 | 0 | 0 | 0 | 0 |
| Coriobacteriales   | 0 | 1 | 0 | 0 | 0 | 0 | 0 |
| Fusobacteriales    | 0 | 0 | 0 | 0 | 0 | 0 | 0 |
| Bacteroidetes      | 0 | 0 | 0 | 0 | 1 | 0 | 0 |
| Chlorobiales       | 0 | 0 | 0 | 1 | 0 | 0 | 0 |
| Asterales          | 0 | 0 | 0 | 0 | 0 | 0 | 0 |
| Acholeplasmatales  | 0 | 0 | 0 | 0 | 0 | 0 | 0 |

Mutual exclusion network

| Order                  | Thermoanaerobacterales | Actinomycetales | Synergistales | Bacteroidales | Spirochaetales | Fibrobacterales | Selenomonadales |
|------------------------|------------------------|-----------------|---------------|---------------|----------------|-----------------|-----------------|
| Thermoanaerobacterales | 0                      | 1               | 0             | 0             | 0              | 0               | 0               |
| Actinomycetales        | 1                      | 0               | 0             | 1             | 0              | 0               | 0               |
| Synergistales          | 0                      | 0               | 0             | 1             | 0              | 0               | 0               |
| Bacteroidales          | 0                      | 1               | 1             | 0             | 0              | 0               | 1               |

France

|                           |   |   |   |   |   |   |   |
|---------------------------|---|---|---|---|---|---|---|
| <b>Spirochaetales</b>     | 0 | 0 | 0 | 0 | 0 | 1 | 0 |
| <b>Fibrobacterales</b>    | 0 | 0 | 0 | 0 | 1 | 0 | 0 |
| <b>Selenomonadales</b>    | 0 | 0 | 0 | 1 | 0 | 0 | 0 |
| <b>Erysipelotrichales</b> | 0 | 0 | 0 | 0 | 0 | 0 | 1 |
| <b>Opitutales</b>         | 0 | 0 | 0 | 1 | 0 | 0 | 0 |
| <b>Neisseriales</b>       | 0 | 0 | 0 | 0 | 0 | 0 | 0 |
| <b>Clostridiales</b>      | 0 | 0 | 0 | 3 | 0 | 1 | 2 |
| <b>Lactobacillales</b>    | 0 | 0 | 1 | 0 | 0 | 0 | 0 |
| <b>Coriobacterales</b>    | 0 | 0 | 0 | 0 | 0 | 0 | 0 |
| <b>Flavobacteriales</b>   | 0 | 0 | 0 | 0 | 0 | 0 | 0 |
| <b>Fabales</b>            | 0 | 0 | 0 | 0 | 0 | 0 | 0 |
| <b>Aeromonadales</b>      | 0 | 0 | 0 | 0 | 0 | 0 | 0 |
| <b>Desulfovibrionales</b> | 0 | 1 | 0 | 1 | 0 | 0 | 0 |
| <b>Burkholderiales</b>    | 0 | 0 | 0 | 0 | 0 | 0 | 0 |
| <b>Cardiobacteriales</b>  | 0 | 0 | 0 | 0 | 0 | 1 | 0 |
| <b>Bifidobacteriales</b>  | 0 | 0 | 0 | 1 | 0 | 0 | 0 |
| <b>Rhodospirillales</b>   | 0 | 0 | 0 | 1 | 0 | 0 | 0 |
| <b>Caulobacterales</b>    | 0 | 0 | 0 | 1 | 0 | 0 | 0 |
| <b>Bacillales</b>         | 0 | 0 | 0 | 0 | 0 | 0 | 0 |
| <b>Desulfobacterales</b>  | 0 | 0 | 0 | 0 | 0 | 0 | 0 |

| <b>Order</b>                  | <b>Erysipelotrichales</b> | <b>Opitutales</b> | <b>Neisseriales</b> | <b>Clostridiales</b> | <b>Lactobacillales</b> | <b>Coriobacterales</b> | <b>Flavobacteriales</b> |
|-------------------------------|---------------------------|-------------------|---------------------|----------------------|------------------------|------------------------|-------------------------|
| <b>Thermoanaerobacterales</b> | 0                         | 0                 | 0                   | 0                    | 0                      | 0                      | 0                       |
| <b>Actinomycetales</b>        | 0                         | 0                 | 0                   | 0                    | 0                      | 0                      | 0                       |
| <b>Synergistales</b>          | 0                         | 0                 | 0                   | 0                    | 1                      | 0                      | 0                       |
| <b>Bacteroidales</b>          | 0                         | 1                 | 0                   | 3                    | 0                      | 0                      | 0                       |
| <b>Spirochaetales</b>         | 0                         | 0                 | 0                   | 0                    | 0                      | 0                      | 0                       |
| <b>Fibrobacterales</b>        | 0                         | 0                 | 0                   | 1                    | 0                      | 0                      | 0                       |
| <b>Selenomonadales</b>        | 1                         | 0                 | 0                   | 2                    | 0                      | 0                      | 0                       |
| <b>Erysipelotrichales</b>     | 1                         | 0                 | 0                   | 1                    | 0                      | 3                      | 1                       |
| <b>Opitutales</b>             | 0                         | 0                 | 0                   | 1                    | 0                      | 0                      | 0                       |
| <b>Neisseriales</b>           | 0                         | 0                 | 0                   | 1                    | 0                      | 0                      | 0                       |
| <b>Clostridiales</b>          | 1                         | 1                 | 1                   | 4                    | 3                      | 0                      | 0                       |
| <b>Lactobacillales</b>        | 0                         | 0                 | 0                   | 3                    | 0                      | 1                      | 0                       |
| <b>Coriobacterales</b>        | 3                         | 0                 | 0                   | 0                    | 1                      | 0                      | 0                       |
| <b>Flavobacteriales</b>       | 1                         | 0                 | 0                   | 0                    | 0                      | 0                      | 0                       |
| <b>Fabales</b>                | 0                         | 0                 | 0                   | 1                    | 0                      | 0                      | 0                       |
| <b>Aeromonadales</b>          | 0                         | 0                 | 0                   | 0                    | 0                      | 0                      | 0                       |
| <b>Desulfovibrionales</b>     | 0                         | 0                 | 0                   | 1                    | 1                      | 0                      | 0                       |

France

|                          |   |   |   |   |   |   |   |
|--------------------------|---|---|---|---|---|---|---|
| <b>Burkholderiales</b>   | 0 | 0 | 0 | 1 | 0 | 1 | 0 |
| <b>Cardiobacteriales</b> | 0 | 0 | 0 | 0 | 0 | 0 | 0 |
| <b>Bifidobacteriales</b> | 0 | 0 | 0 | 1 | 0 | 0 | 0 |
| <b>Rhodospirillales</b>  | 0 | 0 | 0 | 0 | 0 | 0 | 0 |
| <b>Caulobacterales</b>   | 0 | 0 | 0 | 0 | 2 | 0 | 0 |
| <b>Bacillales</b>        | 0 | 0 | 0 | 0 | 1 | 0 | 0 |
| <b>Desulfobacterales</b> | 0 | 0 | 0 | 2 | 0 | 0 | 0 |

| <b>Order</b>                  | <b>Fabales</b> | <b>Aeromonadales</b> | <b>Desulfovibrionales</b> | <b>Burkholderiales</b> | <b>Cardiobacteriales</b> | <b>Bifidobacteriales</b> | <b>Rhodospirillales</b> |
|-------------------------------|----------------|----------------------|---------------------------|------------------------|--------------------------|--------------------------|-------------------------|
| <b>Thermoanaerobacterales</b> | 0              | 0                    | 0                         | 0                      | 0                        | 0                        | 0                       |
| <b>Actinomycetales</b>        | 0              | 0                    | 1                         | 0                      | 0                        | 0                        | 0                       |
| <b>Synergistales</b>          | 0              | 0                    | 0                         | 0                      | 0                        | 0                        | 0                       |
| <b>Bacteroidales</b>          | 0              | 0                    | 1                         | 0                      | 0                        | 1                        | 1                       |
| <b>Spirochaetales</b>         | 0              | 0                    | 0                         | 0                      | 0                        | 0                        | 0                       |
| <b>Fibrobacterales</b>        | 0              | 0                    | 0                         | 0                      | 1                        | 0                        | 0                       |
| <b>Selenomonadales</b>        | 0              | 0                    | 0                         | 0                      | 0                        | 0                        | 0                       |
| <b>Erysipelotrichales</b>     | 0              | 0                    | 0                         | 0                      | 0                        | 0                        | 0                       |
| <b>Opitutales</b>             | 0              | 0                    | 0                         | 0                      | 0                        | 0                        | 0                       |
| <b>Neisseriales</b>           | 0              | 0                    | 0                         | 0                      | 0                        | 0                        | 0                       |
| <b>Clostridiales</b>          | 1              | 0                    | 1                         | 1                      | 0                        | 1                        | 0                       |
| <b>Lactobacillales</b>        | 0              | 0                    | 1                         | 0                      | 0                        | 0                        | 0                       |
| <b>Coriobacteriales</b>       | 0              | 0                    | 0                         | 1                      | 0                        | 0                        | 0                       |
| <b>Flavobacteriales</b>       | 0              | 0                    | 0                         | 0                      | 0                        | 0                        | 0                       |
| <b>Fabales</b>                | 0              | 1                    | 0                         | 0                      | 0                        | 0                        | 0                       |
| <b>Aeromonadales</b>          | 1              | 0                    | 0                         | 0                      | 0                        | 0                        | 0                       |
| <b>Desulfovibrionales</b>     | 0              | 0                    | 0                         | 0                      | 0                        | 0                        | 0                       |
| <b>Burkholderiales</b>        | 0              | 0                    | 0                         | 0                      | 0                        | 0                        | 0                       |
| <b>Cardiobacteriales</b>      | 0              | 0                    | 0                         | 0                      | 0                        | 0                        | 0                       |
| <b>Bifidobacteriales</b>      | 0              | 0                    | 0                         | 0                      | 0                        | 0                        | 0                       |
| <b>Rhodospirillales</b>       | 0              | 0                    | 0                         | 0                      | 0                        | 0                        | 0                       |
| <b>Caulobacterales</b>        | 0              | 0                    | 0                         | 0                      | 0                        | 0                        | 0                       |
| <b>Bacillales</b>             | 0              | 0                    | 0                         | 0                      | 0                        | 0                        | 0                       |
| <b>Desulfobacterales</b>      | 0              | 0                    | 0                         | 0                      | 0                        | 0                        | 0                       |

| <b>Order</b>                  | <b>Caulobacterales</b> | <b>Bacillales</b> | <b>Desulfobacterales</b> |
|-------------------------------|------------------------|-------------------|--------------------------|
| <b>Thermoanaerobacterales</b> | 0                      | 0                 | 0                        |
| <b>Actinomycetales</b>        | 0                      | 0                 | 0                        |
| <b>Synergistales</b>          | 0                      | 0                 | 0                        |
| <b>Bacteroidales</b>          | 1                      | 0                 | 0                        |

|                           |   |   |   |
|---------------------------|---|---|---|
| <b>Spirochaetales</b>     | 0 | 0 | 0 |
| <b>Fibrobacterales</b>    | 0 | 0 | 0 |
| <b>Selenomonadales</b>    | 0 | 0 | 0 |
| <b>Erysipelotrichales</b> | 0 | 0 | 0 |
| <b>Opitutales</b>         | 0 | 0 | 0 |
| <b>Neisseriales</b>       | 0 | 0 | 0 |
| <b>Clostridiales</b>      | 0 | 0 | 2 |
| <b>Lactobacillales</b>    | 2 | 1 | 0 |
| <b>Coriobacterales</b>    | 0 | 0 | 0 |
| <b>Flavobacteriales</b>   | 0 | 0 | 0 |
| <b>Fabales</b>            | 0 | 0 | 0 |
| <b>Aeromonadales</b>      | 0 | 0 | 0 |
| <b>Desulfovibrionales</b> | 0 | 0 | 0 |
| <b>Burkholderiales</b>    | 0 | 0 | 0 |
| <b>Cardiobacteriales</b>  | 0 | 0 | 0 |
| <b>Bifidobacteriales</b>  | 0 | 0 | 0 |
| <b>Rhodospirillales</b>   | 0 | 0 | 0 |
| <b>Caulobacterales</b>    | 0 | 0 | 0 |
| <b>Bacillales</b>         | 0 | 0 | 0 |
| <b>Desulfobacterales</b>  | 0 | 0 | 0 |

## Co-occurrence network

| Order              | Clostridiales | Erysipelotrichales | Enterobacteriales | Lactobacillales | Bacteroidales | Vibrionales | Aeromonadales |
|--------------------|---------------|--------------------|-------------------|-----------------|---------------|-------------|---------------|
| Clostridiales      | 62            | 19                 | 0                 | 5               | 6             | 3           | 1             |
| Erysipelotrichales | 19            | 1                  | 0                 | 0               | 2             | 2           | 1             |
| Enterobacteriales  | 0             | 0                  | 6                 | 2               | 0             | 0           | 0             |
| Lactobacillales    | 5             | 0                  | 2                 | 0               | 0             | 0           | 0             |
| Bacteroidales      | 6             | 2                  | 0                 | 0               | 2             | 0           | 0             |
| Vibrionales        | 3             | 2                  | 0                 | 0               | 0             | 1           | 4             |
| Aeromonadales      | 1             | 1                  | 0                 | 0               | 0             | 4           | 1             |
| Fibrobacterales    | 4             | 1                  | 0                 | 0               | 2             | 0           | 0             |
| Selenomonadales    | 7             | 1                  | 3                 | 0               | 3             | 0           | 0             |
| Fusobacteriales    | 5             | 1                  | 0                 | 0               | 0             | 2           | 1             |
| Flavobacteriales   | 5             | 0                  | 0                 | 0               | 2             | 0           | 0             |
| Coriobacteriales   | 6             | 4                  | 0                 | 0               | 3             | 0           | 0             |
| Synergistales      | 4             | 1                  | 0                 | 0               | 1             | 0           | 0             |
| Asterales          | 1             | 1                  | 0                 | 0               | 1             | 0           | 0             |
| Spirochaetales     | 4             | 0                  | 0                 | 0               | 0             | 2           | 1             |
| Desulfovibrionales | 1             | 1                  | 0                 | 0               | 1             | 0           | 0             |
| Bifidobacteriales  | 3             | 0                  | 0                 | 0               | 0             | 0           | 0             |
| Burkholderiales    | 0             | 0                  | 1                 | 0               | 2             | 0           | 0             |
| Pasteurellales     | 0             | 0                  | 0                 | 0               | 0             | 1           | 1             |
| Campylobacteriales | 0             | 0                  | 0                 | 1               | 0             | 0           | 0             |

| Order              | Fibrobacterales | Selenomonadales | Fusobacteriales | Flavobacteriales | Coriobacteriales | Synergistales | Asterales |
|--------------------|-----------------|-----------------|-----------------|------------------|------------------|---------------|-----------|
| Clostridiales      | 4               | 7               | 5               | 5                | 6                | 4             | 1         |
| Erysipelotrichales | 1               | 1               | 1               | 0                | 4                | 1             | 1         |
| Enterobacteriales  | 0               | 3               | 0               | 0                | 0                | 0             | 0         |
| Lactobacillales    | 0               | 0               | 0               | 0                | 0                | 0             | 0         |
| Bacteroidales      | 2               | 3               | 0               | 2                | 3                | 1             | 1         |
| Vibrionales        | 0               | 0               | 2               | 0                | 0                | 0             | 0         |
| Aeromonadales      | 0               | 0               | 1               | 0                | 0                | 0             | 0         |
| Fibrobacterales    | 0               | 1               | 0               | 0                | 2                | 1             | 0         |
| Selenomonadales    | 1               | 3               | 0               | 2                | 2                | 1             | 3         |
| Fusobacteriales    | 0               | 0               | 0               | 0                | 0                | 0             | 0         |
| Flavobacteriales   | 0               | 2               | 0               | 0                | 0                | 0             | 0         |
| Coriobacteriales   | 2               | 2               | 0               | 0                | 1                | 2             | 0         |
| Synergistales      | 1               | 1               | 0               | 0                | 2                | 0             | 0         |
| Asterales          | 0               | 3               | 0               | 0                | 0                | 0             | 0         |

India

|                           |   |   |   |   |   |   |   |
|---------------------------|---|---|---|---|---|---|---|
| <b>Spirochaetales</b>     | 0 | 0 | 1 | 0 | 1 | 0 | 0 |
| <b>Desulfovibrionales</b> | 1 | 0 | 0 | 0 | 2 | 0 | 0 |
| <b>Bifidobacteriales</b>  | 0 | 0 | 0 | 0 | 0 | 0 | 0 |
| <b>Burkholderiales</b>    | 1 | 0 | 0 | 0 | 0 | 0 | 0 |
| <b>Pasteurellales</b>     | 0 | 0 | 0 | 0 | 0 | 0 | 0 |
| <b>Campylobacteriales</b> | 0 | 0 | 0 | 0 | 0 | 0 | 0 |

| <b>Order</b>              | <b>Spirochaetales</b> | <b>Desulfovibrionales</b> | <b>Bifidobacteriales</b> | <b>Burkholderiales</b> | <b>Pasteurellales</b> | <b>Campylobacteriales</b> |
|---------------------------|-----------------------|---------------------------|--------------------------|------------------------|-----------------------|---------------------------|
| <b>Clostridiales</b>      | 4                     | 1                         | 3                        | 0                      | 0                     | 0                         |
| <b>Erysipelotrichales</b> | 0                     | 1                         | 0                        | 0                      | 0                     | 0                         |
| <b>Enterobacteriales</b>  | 0                     | 0                         | 0                        | 1                      | 0                     | 0                         |
| <b>Lactobacillales</b>    | 0                     | 0                         | 0                        | 0                      | 0                     | 1                         |
| <b>Bacteroidales</b>      | 0                     | 1                         | 0                        | 2                      | 0                     | 0                         |
| <b>Vibrionales</b>        | 2                     | 0                         | 0                        | 0                      | 1                     | 0                         |
| <b>Aeromonadales</b>      | 1                     | 0                         | 0                        | 0                      | 1                     | 0                         |
| <b>Fibrobacteriales</b>   | 0                     | 1                         | 0                        | 1                      | 0                     | 0                         |
| <b>Selenomonadales</b>    | 0                     | 0                         | 0                        | 0                      | 0                     | 0                         |
| <b>Fusobacteriales</b>    | 1                     | 0                         | 0                        | 0                      | 0                     | 0                         |
| <b>Flavobacteriales</b>   | 0                     | 0                         | 0                        | 0                      | 0                     | 0                         |
| <b>Coriobacteriales</b>   | 1                     | 2                         | 0                        | 0                      | 0                     | 0                         |
| <b>Synergistales</b>      | 0                     | 0                         | 0                        | 0                      | 0                     | 0                         |
| <b>Asterales</b>          | 0                     | 0                         | 0                        | 0                      | 0                     | 0                         |
| <b>Spirochaetales</b>     | 0                     | 0                         | 0                        | 0                      | 0                     | 0                         |
| <b>Desulfovibrionales</b> | 0                     | 0                         | 1                        | 0                      | 0                     | 0                         |
| <b>Bifidobacteriales</b>  | 0                     | 1                         | 0                        | 0                      | 0                     | 0                         |
| <b>Burkholderiales</b>    | 0                     | 0                         | 0                        | 0                      | 0                     | 0                         |
| <b>Pasteurellales</b>     | 0                     | 0                         | 0                        | 0                      | 0                     | 0                         |
| <b>Campylobacteriales</b> | 0                     | 0                         | 0                        | 0                      | 0                     | 1                         |

**Mutual exclusion network**

| <b>Order</b>             | <b>Coriobacteriales</b> | <b>Bacteroidales</b> | <b>Clostridiales</b> | <b>Lactobacillales</b> | <b>Bifidobacteriales</b> |
|--------------------------|-------------------------|----------------------|----------------------|------------------------|--------------------------|
| <b>Coriobacteriales</b>  | 0                       | 1                    | 0                    | 0                      | 0                        |
| <b>Bacteroidales</b>     | 1                       | 0                    | 1                    | 0                      | 1                        |
| <b>Clostridiales</b>     | 0                       | 1                    | 0                    | 1                      | 0                        |
| <b>Lactobacillales</b>   | 0                       | 0                    | 1                    | 0                      | 0                        |
| <b>Bifidobacteriales</b> | 0                       | 1                    | 0                    | 0                      | 0                        |



## Co-occurrence network

| Order                  | Enterobacteriales | Actinomycetales | Myxococcales | Clostridiales | Synergistales | Flavobacteriales | Hexacorallia |
|------------------------|-------------------|-----------------|--------------|---------------|---------------|------------------|--------------|
| Enterobacteriales      | 4                 | 0               | 0            | 0             | 0             | 2                | 0            |
| Actinomycetales        | 0                 | 3               | 7            | 2             | 3             | 3                | 3            |
| Myxococcales           | 0                 | 7               | 1            | 0             | 2             | 2                | 2            |
| Clostridiales          | 0                 | 2               | 0            | 3             | 3             | 0                | 0            |
| Synergistales          | 0                 | 3               | 2            | 3             | 0             | 1                | 1            |
| Flavobacteriales       | 2                 | 3               | 2            | 0             | 1             | 0                | 1            |
| Hexacorallia           | 0                 | 3               | 2            | 0             | 1             | 1                | 0            |
| Methanomicrobiales     | 2                 | 0               | 0            | 0             | 0             | 1                | 0            |
| Fusobacteriales        | 2                 | 0               | 0            | 0             | 0             | 1                | 0            |
| Thermoanaerobacterales | 0                 | 1               | 0            | 1             | 0             | 0                | 0            |
| Opitutales             | 0                 | 0               | 0            | 0             | 0             | 0                | 0            |
| Methylococcales        | 0                 | 0               | 0            | 0             | 0             | 0                | 0            |
| Caulobacterales        | 0                 | 1               | 0            | 1             | 0             | 0                | 0            |
| Sphaerobacterales      | 0                 | 0               | 0            | 1             | 0             | 0                | 0            |
| Rubrobacterales        | 0                 | 0               | 0            | 1             | 0             | 0                | 0            |
| Rhodocyclales          | 0                 | 0               | 0            | 1             | 0             | 0                | 0            |
| Bacillales             | 0                 | 1               | 1            | 0             | 0             | 0                | 0            |
| Fabales                | 0                 | 0               | 0            | 0             | 0             | 0                | 0            |
| Lactobacillales        | 0                 | 0               | 0            | 0             | 0             | 0                | 0            |
| Desulfuromonadales     | 0                 | 1               | 0            | 0             | 0             | 0                | 0            |
| Spirochaetales         | 0                 | 0               | 0            | 0             | 0             | 0                | 0            |
| Chromatiales           | 0                 | 2               | 0            | 0             | 0             | 0                | 0            |
| Deinococcales          | 0                 | 0               | 0            | 0             | 0             | 0                | 0            |
| Sphingomonadales       | 0                 | 0               | 0            | 0             | 0             | 0                | 0            |
| Erysipelotrichales     | 0                 | 0               | 0            | 1             | 0             | 0                | 0            |
| Rhodospirillales       | 0                 | 1               | 0            | 0             | 0             | 0                | 0            |
| Chlorobiales           | 0                 | 0               | 0            | 0             | 0             | 0                | 0            |
| Burkholderiales        | 0                 | 1               | 0            | 0             | 0             | 0                | 0            |
| Asterales              | 0                 | 1               | 0            | 0             | 0             | 0                | 0            |
| Bacteroidales          | 0                 | 0               | 0            | 1             | 0             | 0                | 0            |

| Order             | Methanomicrobiales | Fusobacteriales | Thermoanaerobacterales | Opitutales | Methylococcales | Caulobacterales | Sphaerobacterales |
|-------------------|--------------------|-----------------|------------------------|------------|-----------------|-----------------|-------------------|
| Enterobacteriales | 2                  | 2               | 0                      | 0          | 0               | 0               | 0                 |
| Actinomycetales   | 0                  | 0               | 1                      | 0          | 0               | 1               | 0                 |
| Myxococcales      | 0                  | 0               | 0                      | 0          | 0               | 0               | 0                 |
| Clostridiales     | 0                  | 0               | 1                      | 0          | 0               | 1               | 1                 |

## Italy

|                               |   |   |   |   |   |   |   |
|-------------------------------|---|---|---|---|---|---|---|
| <b>Synergistales</b>          | 0 | 0 | 0 | 0 | 0 | 0 | 0 |
| <b>Flavobacteriales</b>       | 1 | 1 | 0 | 0 | 0 | 0 | 0 |
| <b>Hexacorallia</b>           | 0 | 0 | 0 | 0 | 0 | 0 | 0 |
| <b>Methanomicrobiales</b>     | 0 | 1 | 0 | 0 | 0 | 0 | 0 |
| <b>Fusobacteriales</b>        | 1 | 0 | 0 | 0 | 0 | 0 | 0 |
| <b>Thermoanaerobacterales</b> | 0 | 0 | 0 | 1 | 1 | 1 | 0 |
| <b>Opitutales</b>             | 0 | 0 | 1 | 0 | 1 | 0 | 0 |
| <b>Methylococcales</b>        | 0 | 0 | 1 | 1 | 0 | 0 | 0 |
| <b>Caulobacterales</b>        | 0 | 0 | 1 | 0 | 0 | 0 | 0 |
| <b>Sphaerobacterales</b>      | 0 | 0 | 0 | 0 | 0 | 0 | 0 |
| <b>Rubrobacterales</b>        | 0 | 0 | 0 | 0 | 0 | 0 | 1 |
| <b>Rhodocyclales</b>          | 0 | 0 | 0 | 0 | 0 | 0 | 0 |
| <b>Bacillales</b>             | 0 | 0 | 0 | 0 | 0 | 0 | 0 |
| <b>Fabales</b>                | 0 | 0 | 0 | 0 | 0 | 0 | 0 |
| <b>Lactobacillales</b>        | 0 | 0 | 0 | 0 | 0 | 0 | 0 |
| <b>Desulfuromonadales</b>     | 0 | 0 | 0 | 0 | 0 | 0 | 0 |
| <b>Spirochaetales</b>         | 0 | 0 | 0 | 0 | 0 | 0 | 0 |
| <b>Chromatiales</b>           | 0 | 0 | 0 | 0 | 0 | 0 | 0 |
| <b>Deinococcales</b>          | 0 | 0 | 0 | 0 | 0 | 0 | 0 |
| <b>Sphingomonadales</b>       | 0 | 0 | 0 | 0 | 0 | 0 | 0 |
| <b>Erysipelotrichales</b>     | 0 | 0 | 0 | 0 | 0 | 0 | 0 |
| <b>Rhodospirillales</b>       | 0 | 0 | 0 | 0 | 0 | 0 | 0 |
| <b>Chlorobiales</b>           | 0 | 0 | 0 | 0 | 0 | 0 | 0 |
| <b>Burkholderiales</b>        | 0 | 0 | 0 | 0 | 0 | 0 | 0 |
| <b>Asterales</b>              | 0 | 0 | 0 | 0 | 0 | 0 | 0 |
| <b>Bacteroidales</b>          | 0 | 0 | 0 | 0 | 0 | 0 | 1 |

| <b>Order</b>                  | <b>Rubrobacterales</b> | <b>Rhodocyclales</b> | <b>Bacillales</b> | <b>Fabales</b> | <b>Lactobacillales</b> | <b>Desulfuromonadales</b> | <b>Spirochaetales</b> |
|-------------------------------|------------------------|----------------------|-------------------|----------------|------------------------|---------------------------|-----------------------|
| <b>Enterobacteriales</b>      | 0                      | 0                    | 0                 | 0              | 0                      | 0                         | 0                     |
| <b>Actinomycetales</b>        | 0                      | 0                    | 1                 | 0              | 0                      | 1                         | 0                     |
| <b>Myxococcales</b>           | 0                      | 0                    | 1                 | 0              | 0                      | 0                         | 0                     |
| <b>Clostridiales</b>          | 1                      | 1                    | 0                 | 0              | 0                      | 0                         | 0                     |
| <b>Synergistales</b>          | 0                      | 0                    | 0                 | 0              | 0                      | 0                         | 0                     |
| <b>Flavobacteriales</b>       | 0                      | 0                    | 0                 | 0              | 0                      | 0                         | 0                     |
| <b>Hexacorallia</b>           | 0                      | 0                    | 0                 | 0              | 0                      | 0                         | 0                     |
| <b>Methanomicrobiales</b>     | 0                      | 0                    | 0                 | 0              | 0                      | 0                         | 0                     |
| <b>Fusobacteriales</b>        | 0                      | 0                    | 0                 | 0              | 0                      | 0                         | 0                     |
| <b>Thermoanaerobacterales</b> | 0                      | 0                    | 0                 | 0              | 0                      | 0                         | 0                     |
| <b>Opitutales</b>             | 0                      | 0                    | 0                 | 0              | 0                      | 0                         | 0                     |

## Italy

|                           |   |   |   |   |   |   |   |
|---------------------------|---|---|---|---|---|---|---|
| <b>Methylococcales</b>    | 0 | 0 | 0 | 0 | 0 | 0 | 0 |
| <b>Caulobacterales</b>    | 0 | 0 | 0 | 0 | 0 | 0 | 0 |
| <b>Sphaerobacterales</b>  | 1 | 0 | 0 | 0 | 0 | 0 | 0 |
| <b>Rubrobacterales</b>    | 0 | 0 | 0 | 0 | 0 | 0 | 0 |
| <b>Rhodocyclales</b>      | 0 | 0 | 0 | 0 | 0 | 0 | 0 |
| <b>Bacillales</b>         | 0 | 0 | 0 | 0 | 0 | 0 | 0 |
| <b>Fabales</b>            | 0 | 0 | 0 | 0 | 1 | 0 | 0 |
| <b>Lactobacillales</b>    | 0 | 0 | 0 | 1 | 0 | 0 | 0 |
| <b>Desulfuromonadales</b> | 0 | 0 | 0 | 0 | 0 | 0 | 1 |
| <b>Spirochaetales</b>     | 0 | 0 | 0 | 0 | 0 | 1 | 0 |
| <b>Chromatiales</b>       | 0 | 0 | 0 | 0 | 0 | 1 | 0 |
| <b>Deinococcales</b>      | 0 | 0 | 0 | 0 | 0 | 0 | 0 |
| <b>Sphingomonadales</b>   | 0 | 0 | 0 | 0 | 0 | 0 | 0 |
| <b>Erysipelotrichales</b> | 0 | 0 | 0 | 0 | 0 | 0 | 0 |
| <b>Rhodospirillales</b>   | 0 | 0 | 0 | 0 | 0 | 0 | 0 |
| <b>Chlorobiales</b>       | 0 | 0 | 0 | 0 | 0 | 0 | 0 |
| <b>Burkholderiales</b>    | 0 | 0 | 0 | 0 | 0 | 1 | 0 |
| <b>Asterales</b>          | 0 | 0 | 0 | 0 | 0 | 1 | 0 |
| <b>Bacteroidales</b>      | 1 | 0 | 0 | 0 | 0 | 0 | 0 |

| <b>Order</b>                  | <b>Chromatiales</b> | <b>Deinococcales</b> | <b>Sphingomonadales</b> | <b>Erysipelotrichales</b> | <b>Rhodospirillales</b> | <b>Chlorobiales</b> | <b>Burkholderiales</b> |
|-------------------------------|---------------------|----------------------|-------------------------|---------------------------|-------------------------|---------------------|------------------------|
| <b>Enterobacteriales</b>      | 0                   | 0                    | 0                       | 0                         | 0                       | 0                   | 0                      |
| <b>Actinomycetales</b>        | 2                   | 0                    | 0                       | 0                         | 1                       | 0                   | 1                      |
| <b>Myxococcales</b>           | 0                   | 0                    | 0                       | 0                         | 0                       | 0                   | 0                      |
| <b>Clostridiales</b>          | 0                   | 0                    | 0                       | 1                         | 0                       | 0                   | 0                      |
| <b>Synergistales</b>          | 0                   | 0                    | 0                       | 0                         | 0                       | 0                   | 0                      |
| <b>Flavobacteriales</b>       | 0                   | 0                    | 0                       | 0                         | 0                       | 0                   | 0                      |
| <b>Hexacorallia</b>           | 0                   | 0                    | 0                       | 0                         | 0                       | 0                   | 0                      |
| <b>Methanomicrobiales</b>     | 0                   | 0                    | 0                       | 0                         | 0                       | 0                   | 0                      |
| <b>Fusobacteriales</b>        | 0                   | 0                    | 0                       | 0                         | 0                       | 0                   | 0                      |
| <b>Thermoanaerobacterales</b> | 0                   | 0                    | 0                       | 0                         | 0                       | 0                   | 0                      |
| <b>Opitutales</b>             | 0                   | 0                    | 0                       | 0                         | 0                       | 0                   | 0                      |
| <b>Methylococcales</b>        | 0                   | 0                    | 0                       | 0                         | 0                       | 0                   | 0                      |
| <b>Caulobacterales</b>        | 0                   | 0                    | 0                       | 0                         | 0                       | 0                   | 0                      |
| <b>Sphaerobacterales</b>      | 0                   | 0                    | 0                       | 0                         | 0                       | 0                   | 0                      |
| <b>Rubrobacterales</b>        | 0                   | 0                    | 0                       | 0                         | 0                       | 0                   | 0                      |
| <b>Rhodocyclales</b>          | 0                   | 0                    | 0                       | 0                         | 0                       | 0                   | 0                      |
| <b>Bacillales</b>             | 0                   | 0                    | 0                       | 0                         | 0                       | 0                   | 0                      |
| <b>Fabales</b>                | 0                   | 0                    | 0                       | 0                         | 0                       | 0                   | 0                      |

## Italy

|                    |   |   |   |   |   |   |   |
|--------------------|---|---|---|---|---|---|---|
| Lactobacillales    | 0 | 0 | 0 | 0 | 0 | 0 | 0 |
| Desulfuromonadales | 1 | 0 | 0 | 0 | 0 | 0 | 1 |
| Spirochaetales     | 0 | 0 | 0 | 0 | 0 | 0 | 0 |
| Chromatiales       | 0 | 0 | 0 | 0 | 1 | 0 | 1 |
| Deinococcales      | 0 | 0 | 1 | 0 | 0 | 0 | 0 |
| Sphingomonadales   | 0 | 1 | 0 | 0 | 0 | 0 | 0 |
| Erysipelotrichales | 0 | 0 | 0 | 0 | 0 | 1 | 0 |
| Rhodospirillales   | 1 | 0 | 0 | 0 | 0 | 0 | 0 |
| Chlorobiales       | 0 | 0 | 0 | 1 | 0 | 0 | 0 |
| Burkholderiales    | 1 | 0 | 0 | 0 | 0 | 0 | 0 |
| Asterales          | 1 | 0 | 0 | 0 | 0 | 0 | 1 |
| Bacteroidales      | 0 | 0 | 0 | 0 | 0 | 0 | 0 |

| Order                  | Asterales | Bacteroidales |
|------------------------|-----------|---------------|
| Enterobacteriales      | 0         | 0             |
| Actinomycetales        | 1         | 0             |
| Myxococcales           | 0         | 0             |
| Clostridiales          | 0         | 1             |
| Synergistales          | 0         | 0             |
| Flavobacteriales       | 0         | 0             |
| Hexacorallia           | 0         | 0             |
| Methanomicrobiales     | 0         | 0             |
| Fusobacteriales        | 0         | 0             |
| Thermoanaerobacterales | 0         | 0             |
| Opitutales             | 0         | 0             |
| Methylococcales        | 0         | 0             |
| Caulobacterales        | 0         | 0             |
| Sphaerobacterales      | 0         | 1             |
| Rubrobacterales        | 0         | 1             |
| Rhodocyclales          | 0         | 0             |
| Bacillales             | 0         | 0             |
| Fabales                | 0         | 0             |
| Lactobacillales        | 0         | 0             |
| Desulfuromonadales     | 1         | 0             |
| Spirochaetales         | 0         | 0             |
| Chromatiales           | 1         | 0             |
| Deinococcales          | 0         | 0             |
| Sphingomonadales       | 0         | 0             |
| Erysipelotrichales     | 0         | 0             |

Italy

|                  |   |   |
|------------------|---|---|
| Rhodospirillales | 0 | 0 |
| Chlorobiales     | 0 | 0 |
| Burkholderiales  | 1 | 0 |
| Asterales        | 0 | 0 |
| Bacteroidales    | 0 | 0 |

Mutual exclusion network

| Order                  | Verrucomicrobiales | Pasteurellales | Thermoanaerobacterales | Clostridiales | Synergistales | Fusobacteriales | Erysipelotrichales |
|------------------------|--------------------|----------------|------------------------|---------------|---------------|-----------------|--------------------|
| Verrucomicrobiales     | 0                  | 1              | 0                      | 0             | 0             | 0               | 0                  |
| Pasteurellales         | 1                  | 0              | 0                      | 0             | 0             | 0               | 0                  |
| Thermoanaerobacterales | 0                  | 0              | 0                      | 1             | 0             | 0               | 0                  |
| Clostridiales          | 0                  | 0              | 1                      | 1             | 1             | 0               | 0                  |
| Synergistales          | 0                  | 0              | 0                      | 1             | 0             | 0               | 0                  |
| Fusobacteriales        | 0                  | 0              | 0                      | 0             | 0             | 0               | 1                  |
| Erysipelotrichales     | 0                  | 0              | 0                      | 0             | 0             | 1               | 0                  |
| Desulfovibrionales     | 0                  | 0              | 0                      | 0             | 0             | 0               | 0                  |
| Hydrogenophilales      | 0                  | 0              | 0                      | 0             | 0             | 0               | 0                  |
| Coriobacteriales       | 0                  | 0              | 0                      | 0             | 0             | 0               | 0                  |
| Enterobacteriales      | 0                  | 0              | 0                      | 1             | 0             | 0               | 0                  |
| Caulobacterales        | 0                  | 0              | 0                      | 1             | 0             | 0               | 0                  |
| Actinomycetales        | 0                  | 0              | 0                      | 1             | 0             | 0               | 0                  |
| Burkholderiales        | 0                  | 0              | 0                      | 0             | 0             | 0               | 0                  |
| Selenomonadales        | 0                  | 0              | 0                      | 0             | 0             | 0               | 0                  |
| Bacteroidales          | 0                  | 0              | 0                      | 0             | 0             | 0               | 0                  |
| Lactobacillales        | 0                  | 0              | 0                      | 0             | 0             | 0               | 0                  |
| Fabales                | 0                  | 0              | 0                      | 0             | 0             | 0               | 0                  |

| Order                  | Desulfovibrionales | Hydrogenophilales | Coriobacteriales | Enterobacteriales | Caulobacterales | Actinomycetales | Burkholderiales |
|------------------------|--------------------|-------------------|------------------|-------------------|-----------------|-----------------|-----------------|
| Verrucomicrobiales     | 0                  | 0                 | 0                | 0                 | 0               | 0               | 0               |
| Pasteurellales         | 0                  | 0                 | 0                | 0                 | 0               | 0               | 0               |
| Thermoanaerobacterales | 0                  | 0                 | 0                | 0                 | 0               | 0               | 0               |
| Clostridiales          | 0                  | 0                 | 0                | 1                 | 1               | 1               | 0               |
| Synergistales          | 0                  | 0                 | 0                | 0                 | 0               | 0               | 0               |
| Fusobacteriales        | 0                  | 0                 | 0                | 0                 | 0               | 0               | 0               |
| Erysipelotrichales     | 0                  | 0                 | 0                | 0                 | 0               | 0               | 0               |
| Desulfovibrionales     | 0                  | 1                 | 0                | 0                 | 0               | 0               | 0               |
| Hydrogenophilales      | 1                  | 0                 | 0                | 0                 | 0               | 0               | 0               |

## Italy

|                          |   |   |   |   |   |   |   |
|--------------------------|---|---|---|---|---|---|---|
| <b>Coriobacteriales</b>  | 0 | 0 | 1 | 0 | 0 | 0 | 0 |
| <b>Enterobacteriales</b> | 0 | 0 | 0 | 0 | 0 | 0 | 0 |
| <b>Caulobacterales</b>   | 0 | 0 | 0 | 0 | 0 | 0 | 0 |
| <b>Actinomycetales</b>   | 0 | 0 | 0 | 0 | 0 | 0 | 0 |
| <b>Burkholderiales</b>   | 0 | 0 | 0 | 0 | 0 | 0 | 0 |
| <b>Selenomonadales</b>   | 0 | 0 | 0 | 0 | 0 | 0 | 1 |
| <b>Bacteroidales</b>     | 0 | 0 | 0 | 0 | 0 | 0 | 0 |
| <b>Lactobacillales</b>   | 0 | 0 | 0 | 0 | 0 | 0 | 0 |
| <b>Fabales</b>           | 0 | 0 | 0 | 0 | 0 | 0 | 0 |

| <b>Order</b>                  | <b>Selenomonadales</b> | <b>Bacteroidales</b> | <b>Lactobacillales</b> | <b>Fabales</b> |
|-------------------------------|------------------------|----------------------|------------------------|----------------|
| <b>Verrucomicrobiales</b>     | 0                      | 0                    | 0                      | 0              |
| <b>Pasteurellales</b>         | 0                      | 0                    | 0                      | 0              |
| <b>Thermoanaerobacterales</b> | 0                      | 0                    | 0                      | 0              |
| <b>Clostridiales</b>          | 0                      | 0                    | 0                      | 0              |
| <b>Synergistales</b>          | 0                      | 0                    | 0                      | 0              |
| <b>Fusobacteriales</b>        | 0                      | 0                    | 0                      | 0              |
| <b>Erysipelotrichales</b>     | 0                      | 0                    | 0                      | 0              |
| <b>Desulfovibrionales</b>     | 0                      | 0                    | 0                      | 0              |
| <b>Hydrogenophilales</b>      | 0                      | 0                    | 0                      | 0              |
| <b>Coriobacteriales</b>       | 0                      | 0                    | 0                      | 0              |
| <b>Enterobacteriales</b>      | 0                      | 0                    | 0                      | 0              |
| <b>Caulobacterales</b>        | 0                      | 0                    | 0                      | 0              |
| <b>Actinomycetales</b>        | 0                      | 0                    | 0                      | 0              |
| <b>Burkholderiales</b>        | 1                      | 0                    | 0                      | 0              |
| <b>Selenomonadales</b>        | 0                      | 0                    | 0                      | 0              |
| <b>Bacteroidales</b>          | 0                      | 0                    | 1                      | 1              |
| <b>Lactobacillales</b>        | 0                      | 1                    | 0                      | 0              |
| <b>Fabales</b>                | 0                      | 1                    | 0                      | 0              |

## Japan

## Co-occurrence network

| Order                   | Clostridiales | Bacteroidales | Coriobacteriales | Selenomonadales | Erysipelotrichales | Synergistales | Bacillales |
|-------------------------|---------------|---------------|------------------|-----------------|--------------------|---------------|------------|
| Clostridiales           | 69            | 30            | 21               | 18              | 24                 | 16            | 13         |
| Bacteroidales           | 30            | 8             | 2                | 1               | 3                  | 4             | 4          |
| Coriobacteriales        | 21            | 2             | 2                | 2               | 4                  | 5             | 3          |
| Selenomonadales         | 18            | 1             | 2                | 4               | 4                  | 3             | 2          |
| Erysipelotrichales      | 24            | 3             | 4                | 4               | 2                  | 3             | 4          |
| Synergistales           | 16            | 4             | 5                | 3               | 3                  | 1             | 2          |
| Bacillales              | 13            | 4             | 3                | 2               | 4                  | 2             | 0          |
| Spirochaetales          | 9             | 0             | 1                | 2               | 1                  | 1             | 1          |
| Asterales               | 12            | 2             | 2                | 1               | 2                  | 1             | 1          |
| Fibrobacteriales        | 9             | 2             | 3                | 2               | 2                  | 2             | 2          |
| Desulfovibrionales      | 8             | 7             | 2                | 4               | 2                  | 2             | 3          |
| Chromatiales            | 5             | 1             | 3                | 2               | 1                  | 2             | 1          |
| Burkholderiales         | 6             | 6             | 2                | 0               | 0                  | 2             | 1          |
| Aeromonadales           | 5             | 0             | 1                | 0               | 0                  | 0             | 0          |
| Thermoanaerobacteriales | 7             | 1             | 2                | 2               | 3                  | 2             | 1          |
| Pasteurellales          | 5             | 3             | 2                | 1               | 1                  | 2             | 1          |
| Hydrogenophilales       | 2             | 4             | 0                | 0               | 1                  | 0             | 1          |
| Lactobacillales         | 3             | 0             | 0                | 0               | 1                  | 0             | 0          |
| Flavobacteriales        | 3             | 2             | 1                | 1               | 1                  | 0             | 1          |
| Enterobacteriales       | 0             | 0             | 0                | 4               | 0                  | 0             | 0          |
| Verrucomicrobiales      | 0             | 1             | 0                | 0               | 0                  | 0             | 0          |
| Neisseriales            | 0             | 0             | 0                | 0               | 0                  | 0             | 0          |
| Bifidobacteriales       | 2             | 0             | 0                | 0               | 0                  | 0             | 1          |
| Actinomycetales         | 0             | 0             | 0                | 0               | 0                  | 0             | 0          |
| Fabales                 | 0             | 0             | 0                | 0               | 0                  | 0             | 0          |

| Order              | Spirochaetales | Asterales | Fibrobacteriales | Desulfovibrionales | Chromatiales | Burkholderiales | Aeromonadales |
|--------------------|----------------|-----------|------------------|--------------------|--------------|-----------------|---------------|
| Clostridiales      | 9              | 12        | 9                | 8                  | 5            | 6               | 5             |
| Bacteroidales      | 0              | 2         | 2                | 7                  | 1            | 6               | 0             |
| Coriobacteriales   | 1              | 2         | 3                | 2                  | 3            | 2               | 1             |
| Selenomonadales    | 2              | 1         | 2                | 4                  | 2            | 0               | 0             |
| Erysipelotrichales | 1              | 2         | 2                | 2                  | 1            | 0               | 0             |
| Synergistales      | 1              | 1         | 2                | 2                  | 2            | 2               | 0             |
| Bacillales         | 1              | 1         | 2                | 3                  | 1            | 1               | 0             |
| Spirochaetales     | 0              | 1         | 0                | 1                  | 0            | 0               | 1             |
| Asterales          | 1              | 0         | 1                | 0                  | 0            | 0               | 0             |

Japan

|                               |   |   |   |   |   |   |   |
|-------------------------------|---|---|---|---|---|---|---|
| <b>Fibrobacterales</b>        | 0 | 1 | 0 | 1 | 1 | 1 | 0 |
| <b>Desulfovibrionales</b>     | 1 | 0 | 1 | 1 | 2 | 3 | 0 |
| <b>Chromatiales</b>           | 0 | 0 | 1 | 2 | 0 | 1 | 0 |
| <b>Burkholderiales</b>        | 0 | 0 | 1 | 3 | 1 | 0 | 1 |
| <b>Aeromonadales</b>          | 1 | 0 | 0 | 0 | 0 | 1 | 0 |
| <b>Thermoanaerobacterales</b> | 0 | 0 | 1 | 1 | 1 | 1 | 1 |
| <b>Pasteurellales</b>         | 0 | 0 | 1 | 2 | 1 | 1 | 0 |
| <b>Hydrogenophilales</b>      | 0 | 0 | 0 | 0 | 0 | 0 | 0 |
| <b>Lactobacillales</b>        | 0 | 0 | 0 | 0 | 0 | 0 | 0 |
| <b>Flavobacteriales</b>       | 0 | 0 | 1 | 2 | 0 | 0 | 0 |
| <b>Enterobacteriales</b>      | 0 | 0 | 0 | 0 | 0 | 2 | 0 |
| <b>Verrucomicrobiales</b>     | 0 | 0 | 0 | 1 | 0 | 0 | 0 |
| <b>Neisseriales</b>           | 0 | 0 | 0 | 0 | 0 | 1 | 0 |
| <b>Bifidobacteriales</b>      | 0 | 0 | 0 | 0 | 0 | 0 | 0 |
| <b>Actinomycetales</b>        | 0 | 0 | 0 | 0 | 0 | 0 | 0 |
| <b>Fabales</b>                | 0 | 0 | 0 | 0 | 0 | 0 | 0 |

| <b>Order</b>                  | <b>Thermoanaerobacterales</b> | <b>Pasteurellales</b> | <b>Hydrogenophilales</b> | <b>Lactobacillales</b> | <b>Flavobacteriales</b> | <b>Enterobacteriales</b> | <b>Verrucomicrobiales</b> |
|-------------------------------|-------------------------------|-----------------------|--------------------------|------------------------|-------------------------|--------------------------|---------------------------|
| <b>Clostridiales</b>          | 7                             | 5                     | 2                        | 3                      | 3                       | 0                        | 0                         |
| <b>Bacteroidales</b>          | 1                             | 3                     | 4                        | 0                      | 2                       | 0                        | 1                         |
| <b>Coriobacteriales</b>       | 2                             | 2                     | 0                        | 0                      | 1                       | 0                        | 0                         |
| <b>Selenomonadales</b>        | 2                             | 1                     | 0                        | 0                      | 1                       | 4                        | 0                         |
| <b>Erysipelotrichales</b>     | 3                             | 1                     | 1                        | 1                      | 1                       | 0                        | 0                         |
| <b>Synergistales</b>          | 2                             | 2                     | 0                        | 0                      | 0                       | 0                        | 0                         |
| <b>Bacillales</b>             | 1                             | 1                     | 1                        | 0                      | 1                       | 0                        | 0                         |
| <b>Spirochaetales</b>         | 0                             | 0                     | 0                        | 0                      | 0                       | 0                        | 0                         |
| <b>Asterales</b>              | 0                             | 0                     | 0                        | 0                      | 0                       | 0                        | 0                         |
| <b>Fibrobacterales</b>        | 1                             | 1                     | 0                        | 0                      | 1                       | 0                        | 0                         |
| <b>Desulfovibrionales</b>     | 1                             | 2                     | 0                        | 0                      | 2                       | 0                        | 1                         |
| <b>Chromatiales</b>           | 1                             | 1                     | 0                        | 0                      | 0                       | 0                        | 0                         |
| <b>Burkholderiales</b>        | 1                             | 1                     | 0                        | 0                      | 0                       | 2                        | 0                         |
| <b>Aeromonadales</b>          | 1                             | 0                     | 0                        | 0                      | 0                       | 0                        | 0                         |
| <b>Thermoanaerobacterales</b> | 0                             | 1                     | 0                        | 0                      | 0                       | 0                        | 0                         |
| <b>Pasteurellales</b>         | 1                             | 0                     | 0                        | 0                      | 0                       | 0                        | 1                         |
| <b>Hydrogenophilales</b>      | 0                             | 0                     | 0                        | 0                      | 1                       | 0                        | 0                         |
| <b>Lactobacillales</b>        | 0                             | 0                     | 0                        | 0                      | 0                       | 0                        | 0                         |
| <b>Flavobacteriales</b>       | 0                             | 0                     | 1                        | 0                      | 0                       | 0                        | 0                         |
| <b>Enterobacteriales</b>      | 0                             | 0                     | 0                        | 0                      | 0                       | 2                        | 0                         |
| <b>Verrucomicrobiales</b>     | 0                             | 1                     | 0                        | 0                      | 0                       | 0                        | 0                         |



Japan

|                          |   |   |   |   |   |   |   |
|--------------------------|---|---|---|---|---|---|---|
| <b>Neisseriales</b>      | 0 | 0 | 0 | 0 | 0 | 0 | 0 |
| <b>Bifidobacteriales</b> | 0 | 0 | 0 | 0 | 0 | 0 | 0 |
| <b>Actinomycetales</b>   | 0 | 0 | 0 | 0 | 0 | 0 | 0 |
| <b>Fabales</b>           | 0 | 0 | 0 | 0 | 0 | 0 | 0 |

| <b>Order</b>                  | <b>Neisseriales</b> | <b>Bifidobacteriales</b> | <b>Actinomycetales</b> | <b>Fabales</b> |
|-------------------------------|---------------------|--------------------------|------------------------|----------------|
| <b>Clostridiales</b>          | 0                   | 2                        | 0                      | 0              |
| <b>Bacteroidales</b>          | 0                   | 0                        | 0                      | 0              |
| <b>Coriobacteriales</b>       | 0                   | 0                        | 0                      | 0              |
| <b>Selenomonadales</b>        | 0                   | 0                        | 0                      | 0              |
| <b>Erysipelotrichales</b>     | 0                   | 0                        | 0                      | 0              |
| <b>Synergistales</b>          | 0                   | 0                        | 0                      | 0              |
| <b>Bacillales</b>             | 0                   | 1                        | 0                      | 0              |
| <b>Spirochaetales</b>         | 0                   | 0                        | 0                      | 0              |
| <b>Asterales</b>              | 0                   | 0                        | 0                      | 0              |
| <b>Fibrobacteriales</b>       | 0                   | 0                        | 0                      | 0              |
| <b>Desulfovibrionales</b>     | 0                   | 0                        | 0                      | 0              |
| <b>Chromatiales</b>           | 0                   | 0                        | 0                      | 0              |
| <b>Burkholderiales</b>        | 1                   | 0                        | 0                      | 0              |
| <b>Aeromonadales</b>          | 0                   | 0                        | 0                      | 0              |
| <b>Thermoanaerobacterales</b> | 0                   | 0                        | 0                      | 0              |
| <b>Pasteurellales</b>         | 0                   | 0                        | 0                      | 0              |
| <b>Hydrogenophilales</b>      | 0                   | 0                        | 0                      | 0              |
| <b>Lactobacillales</b>        | 0                   | 0                        | 0                      | 0              |
| <b>Flavobacteriales</b>       | 0                   | 0                        | 0                      | 0              |
| <b>Enterobacteriales</b>      | 0                   | 0                        | 0                      | 0              |
| <b>Verrucomicrobiales</b>     | 0                   | 0                        | 0                      | 0              |
| <b>Neisseriales</b>           | 0                   | 0                        | 0                      | 0              |
| <b>Bifidobacteriales</b>      | 0                   | 0                        | 0                      | 0              |
| <b>Actinomycetales</b>        | 0                   | 0                        | 0                      | 1              |
| <b>Fabales</b>                | 0                   | 0                        | 1                      | 0              |

**Mutual exclusion network**

| <b>Order</b>           | <b>Xanthomonadales</b> | <b>Burkholderiales</b> | <b>Selenomonadales</b> | <b>Pasteurellales</b> | <b>Actinomycetales</b> | <b>Lactobacillales</b> | <b>Hydrogenophilales</b> |
|------------------------|------------------------|------------------------|------------------------|-----------------------|------------------------|------------------------|--------------------------|
| <b>Xanthomonadales</b> | 0                      | 1                      | 1                      | 0                     | 0                      | 0                      | 0                        |
| <b>Burkholderiales</b> | 1                      | 0                      | 0                      | 0                     | 1                      | 0                      | 0                        |
| <b>Selenomonadales</b> | 1                      | 0                      | 0                      | 0                     | 0                      | 0                      | 0                        |

Japan

|                          |   |   |   |   |   |   |   |
|--------------------------|---|---|---|---|---|---|---|
| <b>Pasteurellales</b>    | 0 | 0 | 0 | 0 | 1 | 0 | 0 |
| <b>Actinomycetales</b>   | 0 | 1 | 0 | 1 | 0 | 0 | 0 |
| <b>Lactobacillales</b>   | 0 | 0 | 0 | 0 | 0 | 0 | 1 |
| <b>Hydrogenophilales</b> | 0 | 0 | 0 | 0 | 0 | 1 | 0 |
| <b>Clostridiales</b>     | 2 | 0 | 0 | 0 | 2 | 1 | 0 |
| <b>Bacillales</b>        | 0 | 0 | 0 | 0 | 0 | 1 | 0 |
| <b>Flavobacteriales</b>  | 0 | 0 | 0 | 0 | 0 | 1 | 0 |
| <b>Enterobacteriales</b> | 0 | 1 | 0 | 0 | 0 | 0 | 0 |
| <b>Bifidobacteriales</b> | 0 | 0 | 0 | 0 | 0 | 0 | 0 |
| <b>Bacteroidales</b>     | 2 | 0 | 0 | 0 | 3 | 4 | 0 |

| <b>Order</b>             | <b>Clostridiales</b> | <b>Bacillales</b> | <b>Flavobacteriales</b> | <b>Enterobacteriales</b> | <b>Bifidobacteriales</b> | <b>Bacteroidales</b> |
|--------------------------|----------------------|-------------------|-------------------------|--------------------------|--------------------------|----------------------|
| <b>Xanthomonadales</b>   | 2                    | 0                 | 0                       | 0                        | 0                        | 2                    |
| <b>Burkholderiales</b>   | 0                    | 0                 | 0                       | 1                        | 0                        | 0                    |
| <b>Selenomonadales</b>   | 0                    | 0                 | 0                       | 0                        | 0                        | 0                    |
| <b>Pasteurellales</b>    | 0                    | 0                 | 0                       | 0                        | 0                        | 0                    |
| <b>Actinomycetales</b>   | 2                    | 0                 | 0                       | 0                        | 0                        | 3                    |
| <b>Lactobacillales</b>   | 1                    | 1                 | 1                       | 0                        | 0                        | 4                    |
| <b>Hydrogenophilales</b> | 0                    | 0                 | 0                       | 0                        | 0                        | 0                    |
| <b>Clostridiales</b>     | 1                    | 0                 | 0                       | 0                        | 1                        | 0                    |
| <b>Bacillales</b>        | 0                    | 0                 | 0                       | 0                        | 0                        | 0                    |
| <b>Flavobacteriales</b>  | 0                    | 0                 | 0                       | 0                        | 0                        | 0                    |
| <b>Enterobacteriales</b> | 0                    | 0                 | 0                       | 0                        | 0                        | 0                    |
| <b>Bifidobacteriales</b> | 1                    | 0                 | 0                       | 0                        | 0                        | 0                    |
| <b>Bacteroidales</b>     | 0                    | 0                 | 0                       | 0                        | 0                        | 0                    |

## Spain

## Co-occurrence network

| Order                  | Clostridiales | Fusobacteriales | Coriobacteriales | Thermoanaerobacterales | Bacillales | Synergistales | Bacteroidales |
|------------------------|---------------|-----------------|------------------|------------------------|------------|---------------|---------------|
| Clostridiales          | 23            | 11              | 13               | 11                     | 8          | 7             | 0             |
| Fusobacteriales        | 11            | 1               | 0                | 6                      | 2          | 0             | 0             |
| Coriobacteriales       | 13            | 0               | 5                | 0                      | 0          | 2             | 0             |
| Thermoanaerobacterales | 11            | 6               | 0                | 1                      | 1          | 1             | 0             |
| Bacillales             | 8             | 2               | 0                | 1                      | 0          | 1             | 0             |
| Synergistales          | 7             | 0               | 2                | 1                      | 1          | 1             | 0             |
| Bacteroidales          | 0             | 0               | 0                | 0                      | 0          | 0             | 5             |
| Rhodospirillales       | 2             | 0               | 0                | 1                      | 1          | 4             | 1             |
| Selenomonadales        | 6             | 0               | 3                | 0                      | 0          | 1             | 0             |
| Erysipelotrichales     | 5             | 3               | 0                | 2                      | 2          | 0             | 0             |
| Asterales              | 3             | 0               | 2                | 0                      | 0          | 1             | 0             |
| Verrucomicrobiales     | 0             | 0               | 0                | 0                      | 0          | 0             | 0             |
| Lactobacillales        | 2             | 1               | 0                | 1                      | 0          | 0             | 0             |
| Flavobacteriales       | 0             | 0               | 0                | 0                      | 0          | 0             | 2             |
| Burkholderiales        | 1             | 0               | 0                | 1                      | 0          | 2             | 0             |
| Spirochaetales         | 0             | 0               | 0                | 0                      | 0          | 1             | 0             |
| Entomoplasmatales      | 1             | 0               | 0                | 1                      | 0          | 0             | 0             |
| Desulfovibrionales     | 0             | 0               | 0                | 0                      | 0          | 0             | 0             |
| Actinomycetales        | 0             | 0               | 1                | 0                      | 0          | 0             | 0             |
| Bifidobacteriales      | 0             | 0               | 1                | 0                      | 0          | 0             | 0             |
| Acholeplasmatales      | 1             | 0               | 0                | 1                      | 0          | 0             | 0             |

| Order                  | Rhodospirillales | Selenomonadales | Erysipelotrichales | Asterales | Verrucomicrobiales | Lactobacillales | Flavobacteriales |
|------------------------|------------------|-----------------|--------------------|-----------|--------------------|-----------------|------------------|
| Clostridiales          | 2                | 6               | 5                  | 3         | 0                  | 2               | 0                |
| Fusobacteriales        | 0                | 0               | 3                  | 0         | 0                  | 1               | 0                |
| Coriobacteriales       | 0                | 3               | 0                  | 2         | 0                  | 0               | 0                |
| Thermoanaerobacterales | 1                | 0               | 2                  | 0         | 0                  | 1               | 0                |
| Bacillales             | 1                | 0               | 2                  | 0         | 0                  | 0               | 0                |
| Synergistales          | 4                | 1               | 0                  | 1         | 0                  | 0               | 0                |
| Bacteroidales          | 1                | 0               | 0                  | 0         | 0                  | 0               | 2                |
| Rhodospirillales       | 3                | 0               | 0                  | 0         | 2                  | 0               | 0                |
| Selenomonadales        | 0                | 1               | 1                  | 1         | 0                  | 0               | 0                |
| Erysipelotrichales     | 0                | 1               | 0                  | 0         | 0                  | 1               | 0                |
| Asterales              | 0                | 1               | 0                  | 0         | 0                  | 0               | 0                |
| Verrucomicrobiales     | 2                | 0               | 0                  | 0         | 0                  | 0               | 0                |
| Lactobacillales        | 0                | 0               | 1                  | 0         | 0                  | 0               | 0                |

Spain

|                           |   |   |   |   |   |   |   |
|---------------------------|---|---|---|---|---|---|---|
| <b>Flavobacteriales</b>   | 0 | 0 | 0 | 0 | 0 | 0 | 0 |
| <b>Burkholderiales</b>    | 1 | 0 | 0 | 0 | 0 | 0 | 0 |
| <b>Spirochaetales</b>     | 0 | 0 | 0 | 0 | 0 | 0 | 0 |
| <b>Entomoplasmatales</b>  | 0 | 0 | 1 | 0 | 0 | 0 | 0 |
| <b>Desulfovibrionales</b> | 1 | 0 | 0 | 0 | 0 | 0 | 0 |
| <b>Actinomycetales</b>    | 0 | 0 | 0 | 0 | 0 | 0 | 0 |
| <b>Bifidobacteriales</b>  | 0 | 0 | 0 | 0 | 0 | 0 | 0 |
| <b>Acholeplasmatales</b>  | 0 | 0 | 0 | 0 | 0 | 0 | 0 |

| <b>Order</b>                  | <b>Burkholderiales</b> | <b>Spirochaetales</b> | <b>Entomoplasmatales</b> | <b>Desulfovibrionales</b> | <b>Actinomycetales</b> | <b>Bifidobacteriales</b> | <b>Acholeplasmatales</b> |
|-------------------------------|------------------------|-----------------------|--------------------------|---------------------------|------------------------|--------------------------|--------------------------|
| <b>Clostridiales</b>          | 1                      | 0                     | 1                        | 0                         | 0                      | 0                        | 1                        |
| <b>Fusobacteriales</b>        | 0                      | 0                     | 0                        | 0                         | 0                      | 0                        | 0                        |
| <b>Coriobacteriales</b>       | 0                      | 0                     | 0                        | 0                         | 1                      | 1                        | 0                        |
| <b>Thermoanaerobacterales</b> | 1                      | 0                     | 1                        | 0                         | 0                      | 0                        | 1                        |
| <b>Bacillales</b>             | 0                      | 0                     | 0                        | 0                         | 0                      | 0                        | 0                        |
| <b>Synergistales</b>          | 2                      | 1                     | 0                        | 0                         | 0                      | 0                        | 0                        |
| <b>Bacteroidales</b>          | 0                      | 0                     | 0                        | 0                         | 0                      | 0                        | 0                        |
| <b>Rhodospirillales</b>       | 1                      | 0                     | 0                        | 1                         | 0                      | 0                        | 0                        |
| <b>Selenomonadales</b>        | 0                      | 0                     | 0                        | 0                         | 0                      | 0                        | 0                        |
| <b>Erysipelotrichales</b>     | 0                      | 0                     | 1                        | 0                         | 0                      | 0                        | 0                        |
| <b>Asterales</b>              | 0                      | 0                     | 0                        | 0                         | 0                      | 0                        | 0                        |
| <b>Verrucomicrobiales</b>     | 0                      | 0                     | 0                        | 0                         | 0                      | 0                        | 0                        |
| <b>Lactobacillales</b>        | 0                      | 0                     | 0                        | 0                         | 0                      | 0                        | 0                        |
| <b>Flavobacteriales</b>       | 0                      | 0                     | 0                        | 0                         | 0                      | 0                        | 0                        |
| <b>Burkholderiales</b>        | 0                      | 1                     | 0                        | 0                         | 0                      | 0                        | 0                        |
| <b>Spirochaetales</b>         | 1                      | 0                     | 0                        | 0                         | 0                      | 0                        | 0                        |
| <b>Entomoplasmatales</b>      | 0                      | 0                     | 0                        | 0                         | 0                      | 0                        | 1                        |
| <b>Desulfovibrionales</b>     | 0                      | 0                     | 0                        | 0                         | 0                      | 0                        | 0                        |
| <b>Actinomycetales</b>        | 0                      | 0                     | 0                        | 0                         | 0                      | 0                        | 0                        |
| <b>Bifidobacteriales</b>      | 0                      | 0                     | 0                        | 0                         | 0                      | 0                        | 0                        |
| <b>Acholeplasmatales</b>      | 0                      | 0                     | 1                        | 0                         | 0                      | 0                        | 0                        |

Mutual exclusion network

| <b>Order</b>            | <b>Selenomonadales</b> | <b>Anthribidae</b> | <b>Flavobacteriales</b> | <b>Clostridiales</b> | <b>Erysipelotrichales</b> | <b>Bacteroidales</b> | <b>Synergistales</b> |
|-------------------------|------------------------|--------------------|-------------------------|----------------------|---------------------------|----------------------|----------------------|
| <b>Selenomonadales</b>  | 1                      | 1                  | 0                       | 1                    | 0                         | 2                    | 0                    |
| <b>Anthribidae</b>      | 1                      | 0                  | 0                       | 0                    | 0                         | 0                    | 0                    |
| <b>Flavobacteriales</b> | 0                      | 0                  | 0                       | 2                    | 0                         | 0                    | 0                    |

Spain

|                               |   |   |   |    |   |    |   |
|-------------------------------|---|---|---|----|---|----|---|
| <b>Clostridiales</b>          | 1 | 0 | 2 | 2  | 0 | 10 | 1 |
| <b>Erysipelotrichales</b>     | 0 | 0 | 0 | 0  | 0 | 2  | 0 |
| <b>Bacteroidales</b>          | 2 | 0 | 0 | 10 | 2 | 0  | 0 |
| <b>Synergistales</b>          | 0 | 0 | 0 | 1  | 0 | 0  | 0 |
| <b>Asterales</b>              | 0 | 0 | 0 | 2  | 0 | 0  | 0 |
| <b>Lactobacillales</b>        | 0 | 0 | 0 | 0  | 0 | 1  | 0 |
| <b>Fusobacteriales</b>        | 0 | 0 | 0 | 0  | 0 | 1  | 0 |
| <b>Coriobacteriales</b>       | 0 | 0 | 0 | 2  | 0 | 0  | 0 |
| <b>Thermoanaerobacterales</b> | 0 | 0 | 0 | 0  | 0 | 2  | 0 |

| <b>Order</b>                  | <b>Asterales</b> | <b>Lactobacillales</b> | <b>Fusobacteriales</b> | <b>Coriobacteriales</b> | <b>Thermoanaerobacterales</b> |
|-------------------------------|------------------|------------------------|------------------------|-------------------------|-------------------------------|
| <b>Selenomonadales</b>        | 0                | 0                      | 0                      | 0                       | 0                             |
| <b>Anthribidae</b>            | 0                | 0                      | 0                      | 0                       | 0                             |
| <b>Flavobacteriales</b>       | 0                | 0                      | 0                      | 0                       | 0                             |
| <b>Clostridiales</b>          | 2                | 0                      | 0                      | 2                       | 0                             |
| <b>Erysipelotrichales</b>     | 0                | 0                      | 0                      | 0                       | 0                             |
| <b>Bacteroidales</b>          | 0                | 1                      | 1                      | 0                       | 2                             |
| <b>Synergistales</b>          | 0                | 0                      | 0                      | 0                       | 0                             |
| <b>Asterales</b>              | 0                | 0                      | 0                      | 0                       | 0                             |
| <b>Lactobacillales</b>        | 0                | 0                      | 0                      | 0                       | 0                             |
| <b>Fusobacteriales</b>        | 0                | 0                      | 0                      | 0                       | 0                             |
| <b>Coriobacteriales</b>       | 0                | 0                      | 0                      | 0                       | 0                             |
| <b>Thermoanaerobacterales</b> | 0                | 0                      | 0                      | 0                       | 0                             |
