# Supplementary material for: Global investigation of composition and interaction networks in gut microbiomes of individuals belonging to diverse geographies and age-groups
Source: Springer Nature journal article supplement (doi:10.1186/s13099-016-0099-z), 2016-04-23
Supplement: MOESM13 [file 10111910]

## List of genus occurring only in older age groups in gut microbial compositions

|    |                   |
|----|-------------------|
| 1  | Saccharopolyspora |
| 2  | Methylocella      |
| 3  | Acidiphilum       |
| 4  | Oligotropha       |
| 5  | Alkalilimnicola   |
| 6  | Nitrobacter       |
| 7  | Acidobacterium    |
| 8  | Gluconacetobacter |
| 9  | Chloroflexus      |
| 10 | Clavibacter       |
| 11 | Nocardioides      |
| 12 | Thermomonospora   |
| 13 | Rhodothermus      |
| 14 | Methylibium       |
| 15 | Fikenella         |
| 16 | Marinobacter      |
| 17 | Scardovia         |
| 18 | Thermotoga        |
| 19 | Methylococcus     |
| 20 | Chromohalobacter  |
| 21 | Eremococcus       |
| 22 | Gemmatimonas      |
| 23 | Borrelia          |
| 24 | Lawsonia          |
| 25 | Erysipelothrix    |
| 26 | Dechloromonas     |
| 27 | Bartonella        |
| 28 | Sphingopyxis      |
| 29 | Mesorhizobium     |
| 30 | Paracoccus        |
| 31 | Cytophaga         |
| 32 | Ruegeria          |
| 33 | Actinosynnema     |
| 34 | Aromatoleum       |
