# Supplementary material for: Global investigation of composition and interaction networks in gut microbiomes of individuals belonging to diverse geographies and age-groups
Source: Springer Nature journal article supplement (doi:10.1186/s13099-016-0099-z), 2016-04-23
Supplement: MOESM18 [file 10111910]

Diet

| Food Components          | America | China  | Denmark | France | India  | Italy  | Japan  | Spain  |
|--------------------------|---------|--------|---------|--------|--------|--------|--------|--------|
| Cereals - Excluding Beer | 1.0331  | 0.3290 | 1.5010  | 0.5684 | 0.1765 | 0.4171 | 0.2506 | 0.6429 |
| Starchy Roots            | 0.0719  | 0.1363 | 0.2802  | 0.0924 | 0.0419 | 0.0476 | 0.0406 | 0.0807 |
| Sugar Crops              | 0.1686  | 0.0899 | 0.5230  | 0.5993 | 0.2804 | 0.0584 | 0.0357 | 0.0901 |
| Sugar & Sweeteners       | 0.0636  | 0.0114 | 0.1159  | 0.0613 | 0.0242 | 0.0314 | 0.0292 | 0.0260 |
| Pulses                   | 0.0037  | 0.0032 | 0.0054  | 0.0087 | 0.0169 | 0.0068 | 0.0019 | 0.0157 |
| Treenuts                 | 0.0026  | 0.0027 | 0.0052  | 0.0041 | 0.0014 | 0.0084 | 0.0017 | 0.0067 |
| Oilcrops                 | 0.1893  | 0.0824 | 0.1117  | 0.1161 | 0.0410 | 0.0963 | 0.0468 | 0.2640 |
| Vegetable Oils           | 0.0429  | 0.0216 | 0.0750  | 0.0494 | 0.0136 | 0.0518 | 0.0215 | 0.0594 |
| Vegetables               | 0.1208  | 0.3947 | 0.1283  | 0.1220 | 0.0858 | 0.1732 | 0.1107 | 0.1550 |
| Fruits - Excluding Wine  | 0.1155  | 0.0985 | 0.1058  | 0.2353 | 0.0604 | 0.2591 | 0.0577 | 0.2087 |
| Coffee/Tea               | 0.0074  | 0.0011 | 0.0138  | 0.0105 | 0.0007 | 0.0078 | 0.0061 | 0.0075 |
| Meat                     | 0.1180  | 0.0579 | 0.0753  | 0.0900 | 0.0041 | 0.0870 | 0.0497 | 0.0930 |
| Offals                   | 0.0030  | 0.0037 | 0.0056  | 0.0063 | 0.0004 | 0.0026 | 0.0025 | 0.0027 |
| Animal fats              | 0.0186  | 0.0033 | 0.0766  | 0.0146 | 0.0030 | 0.0140 | 0.0045 | 0.0192 |
| Eggs                     | 0.0167  | 0.0204 | 0.0178  | 0.0140 | 0.0028 | 0.0124 | 0.0199 | 0.0153 |
| Milk - Excluding Butter  | 0.2759  | 0.0336 | 0.4065  | 0.2857 | 0.1049 | 0.2753 | 0.0733 | 0.2263 |
| Fish, Seafood            | 0.0255  | 0.0408 | 0.0626  | 0.0347 | 0.0057 | 0.0294 | 0.0698 | 0.0470 |
| Aquatic Products, Other  | 0.0002  | 0.0092 | 0.0016  | 0.0008 | 0.0000 | 0.0005 | 0.0056 | 0.0008 |
| <b>HFD Index</b>         | 0.1066  | 0.1438 | 0.1019  | 0.0987 | 0.0944 | 0.1277 | 0.1244 | 0.1165 |
| <b>Berry Index</b>       | 0.7566  | 0.8248 | 0.7692  | 0.8370 | 0.8173 | 0.8498 | 0.8569 | 0.8355 |
